# Supplementary material for: Case control study: hyperbaric oxygen treatment of mild traumatic brain injury persistent post-concussion syndrome and post-traumatic stress disorder
Source: PubMed Central journal article supplement — Med Gas Res. 2017 Oct 17;7(3):156–74. doi: 10.4103/2045-9912.215745 (PMC5674654; doi:10.4103/2045-9912.215745), 2017-10-17

**Additional File 5: Approach of SPECT MCP and CV at baseline, post-1 HBOT, and post-40 HBOTs to Control Subjects' MCP and CV**

This document summarizes the SPECT values in each brain region, by time point for the Affected subjects (at pre-, 1 day post-, and 40 days post-HBOT), and compares them to the values in Control subjects.

Data is summarized in tables as mean, standard deviation, and standard error of the mean, along with a p-value comparing the Affected subjects' values with the Control subjects' values.

Data is also shown as bar charts (with vertical error-bars representing  $\pm 1$  SEM).

## *Approach of Left Gray 30 MCP to Values in Control Subjects*

|     | Pre-HBOT | Post 1   | Post 40  | Control  |
|-----|----------|----------|----------|----------|
| Mns | 1543.167 | 1589.824 | 1506.506 | 1610.534 |
| SDs | 322.278  | 55.995   | 60.376   | 45.570   |
| SEs | 59.846   | 55.995   | 60.376   | 45.570   |
| Ps  | 0.375    | 0.775    | 0.175    | NA       |

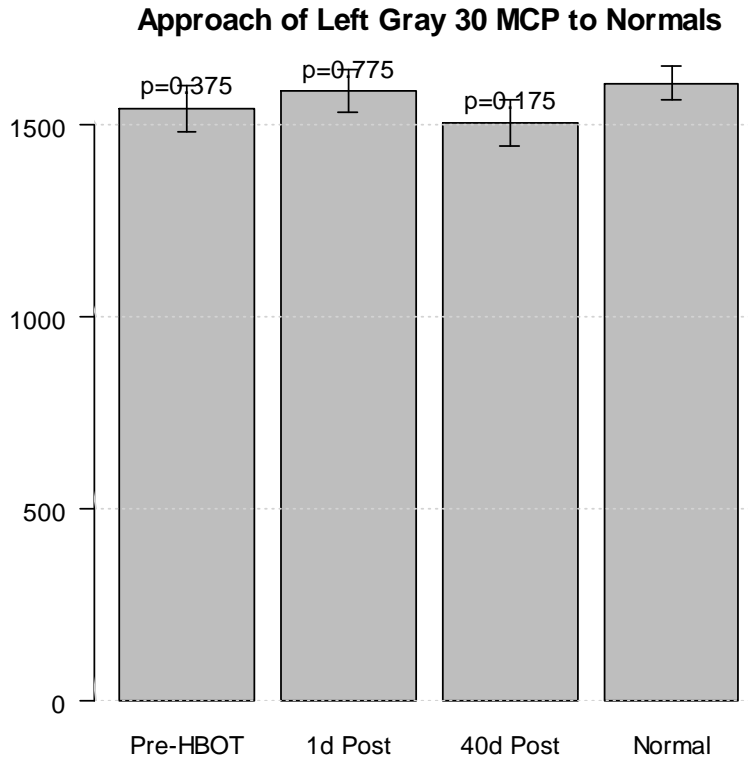

## *Approach of Left Gray 60 MCP to Values in Control Subjects*

|     | Pre-HBOT | Post 1   | Post 40  | Control  |
|-----|----------|----------|----------|----------|
| Mns | 1575.351 | 1616.872 | 1546.638 | 1666.225 |
| SDs | 333.209  | 52.451   | 62.154   | 48.178   |
| SEs | 61.875   | 52.451   | 62.154   | 48.178   |
| Ps  | 0.252    | 0.491    | 0.134    | NA       |

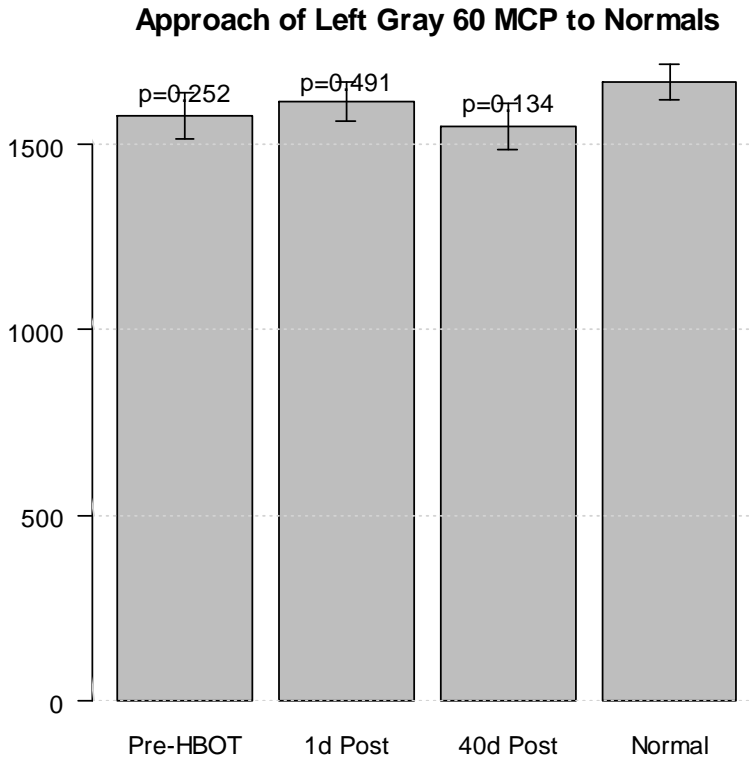

## *Approach of Left Gray 90 MCP to Values in Control Subjects*

|     | Pre-HBOT | Post1    | Post 40  | Control  |
|-----|----------|----------|----------|----------|
| Mns | 1555.488 | 1625.365 | 1555.453 | 1591.109 |
| SDs | 321.329  | 52.813   | 65.103   | 46.788   |
| SEs | 59.669   | 52.813   | 65.103   | 46.788   |
| Ps  | 0.640    | 0.629    | 0.658    | NA       |

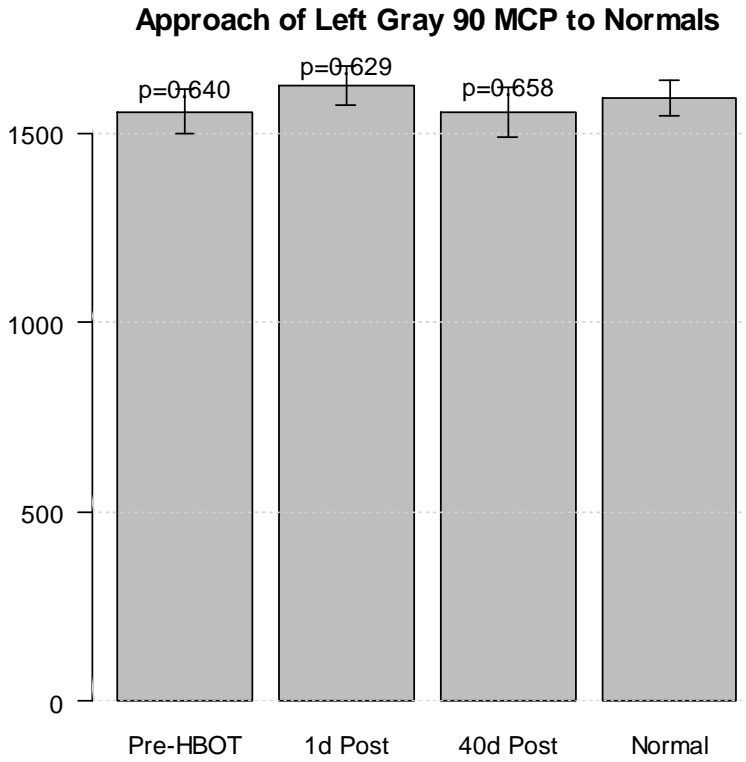

## *Approach of Left Gray 120 MCP to Values in Control Subjects*

|     | Pre-HBOT | Post 1   | Post 40  | Control  |
|-----|----------|----------|----------|----------|
| Mns | 1572.100 | 1652.107 | 1544.818 | 1631.993 |
| SDs | 313.021  | 52.903   | 60.154   | 50.770   |
| SEs | 58.127   | 52.903   | 60.154   | 50.770   |
| Ps  | 0.441    | 0.785    | 0.273    | NA       |

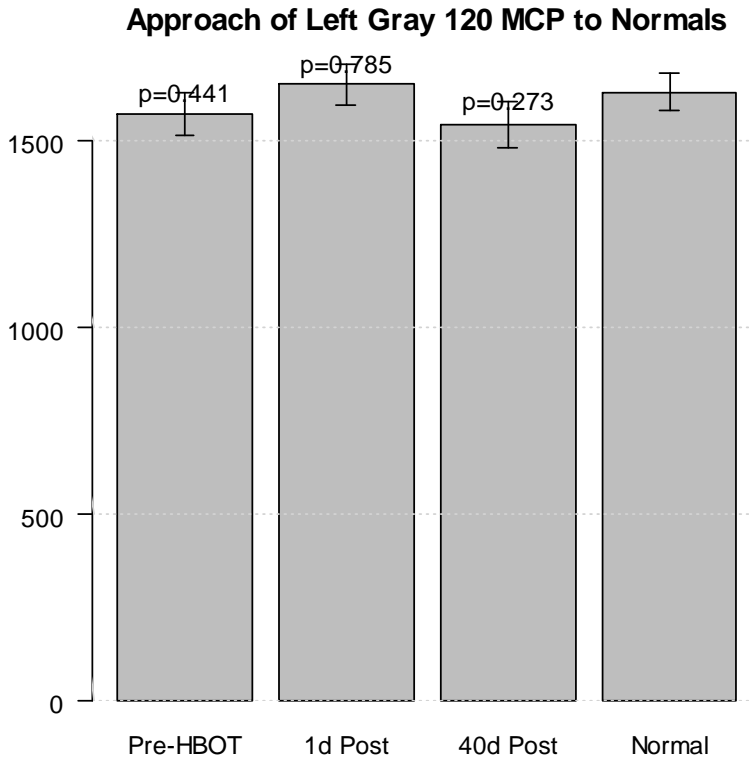

## *Approach of Left Gray 150 MCP to Values in Control Subjects*

|     | Pre-HBOT | Post 1   | Post 40  | Control  |
|-----|----------|----------|----------|----------|
| Mns | 1682.103 | 1744.147 | 1678.112 | 1733.739 |
| SDs | 376.305  | 52.165   | 63.960   | 54.157   |
| SEs | 69.878   | 52.165   | 63.960   | 54.157   |
| Ps  | 0.562    | 0.890    | 0.510    | NA       |

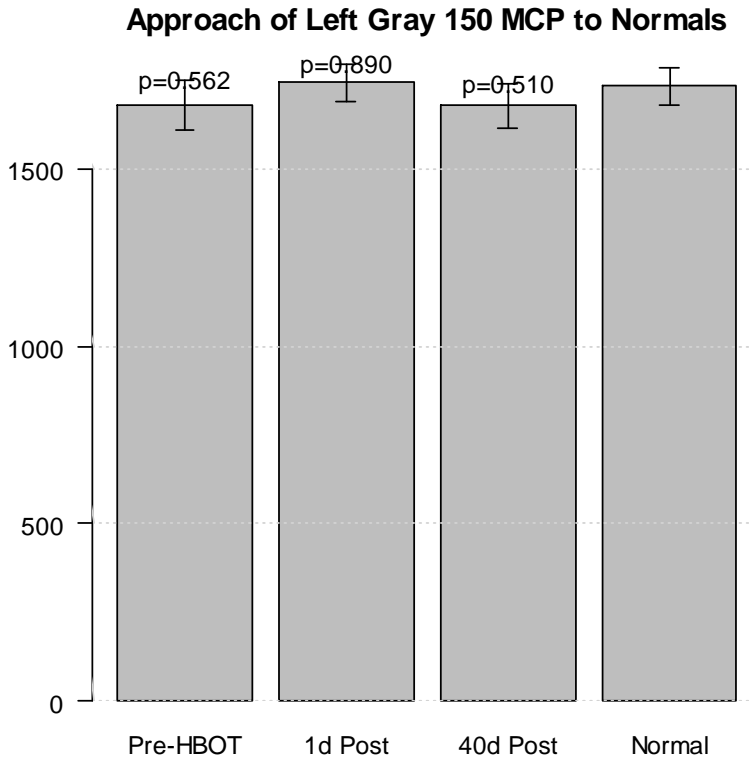

## *Approach of Left Gray All MCP to Values in Control Subjects*

|     | Pre-HBOT | Post 1   | Post 40  | Control |
|-----|----------|----------|----------|---------|
| Mns | 1585.642 | 1645.663 | 1566.305 | 1646.72 |
| SDs | 322.110  | 51.240   | 61.101   | 47.78   |
| SEs | 59.814   | 51.240   | 61.101   | 47.78   |
| Ps  | 0.428    | 0.988    | 0.305    | NA      |

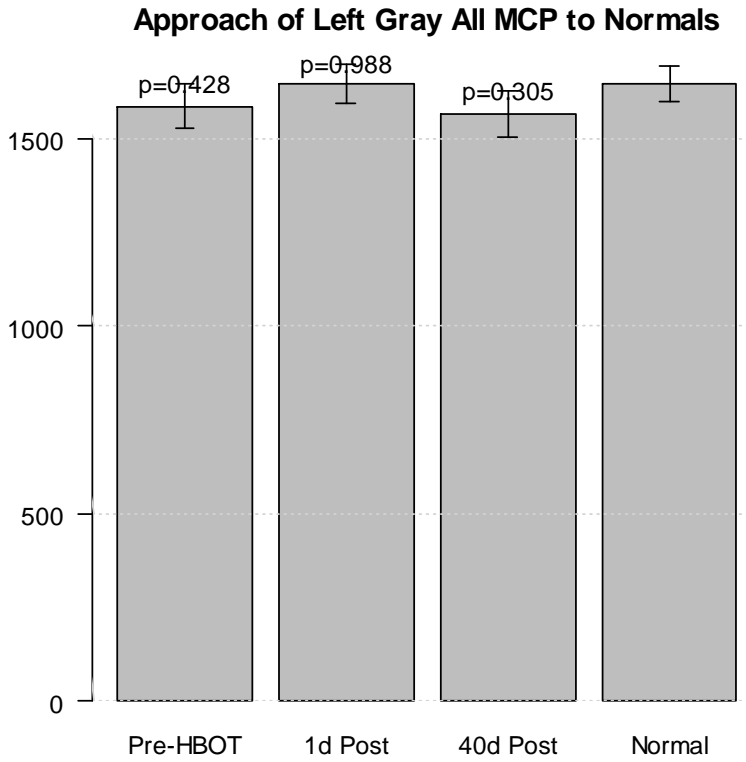

## *Approach of Left White 60 MCP to Values in Control Subjects*

|     | Pre-HBOT | Post 1   | Post 40  | Control  |
|-----|----------|----------|----------|----------|
| Mns | 968.348  | 1120.487 | 1006.614 | 1071.135 |
| SDs | 238.044  | 40.266   | 50.116   | 43.683   |
| SEs | 44.204   | 40.266   | 50.116   | 43.683   |
| Ps  | 0.104    | 0.410    | 0.336    | NA       |

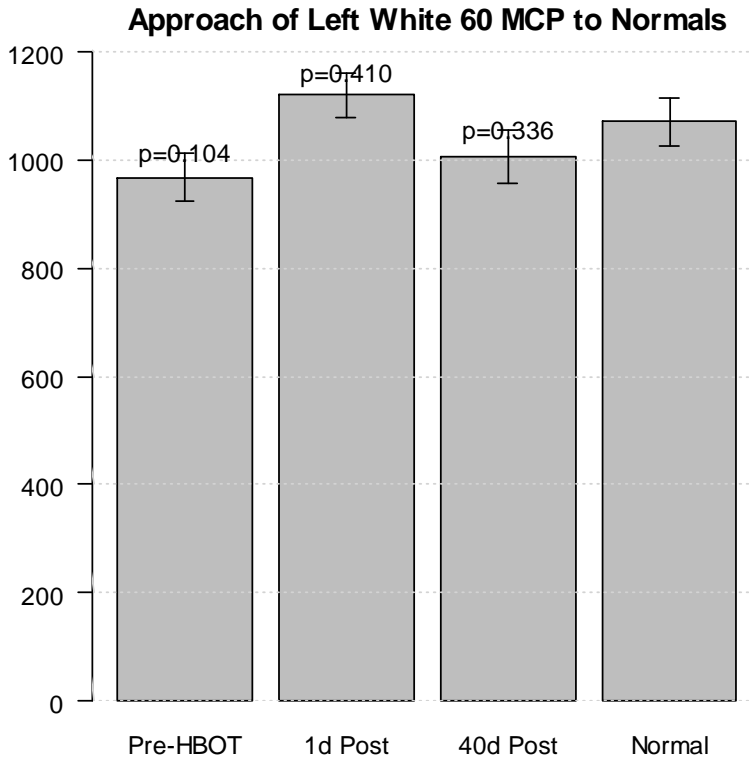



## *Approach of Left White 120 MCP to Values in Control Subjects*

|     | Pre-HBOT | Post 1   | Post 40 | Control  |
|-----|----------|----------|---------|----------|
| Mns | 932.891  | 1063.583 | 949.222 | 1043.482 |
| SDs | 238.181  | 35.736   | 48.765  | 41.611   |
| SEs | 44.229   | 35.736   | 48.765  | 41.611   |
| Ps  | 0.074    | 0.715    | 0.147   | NA       |

### **Approach of Left White 120 MCP to Normals**

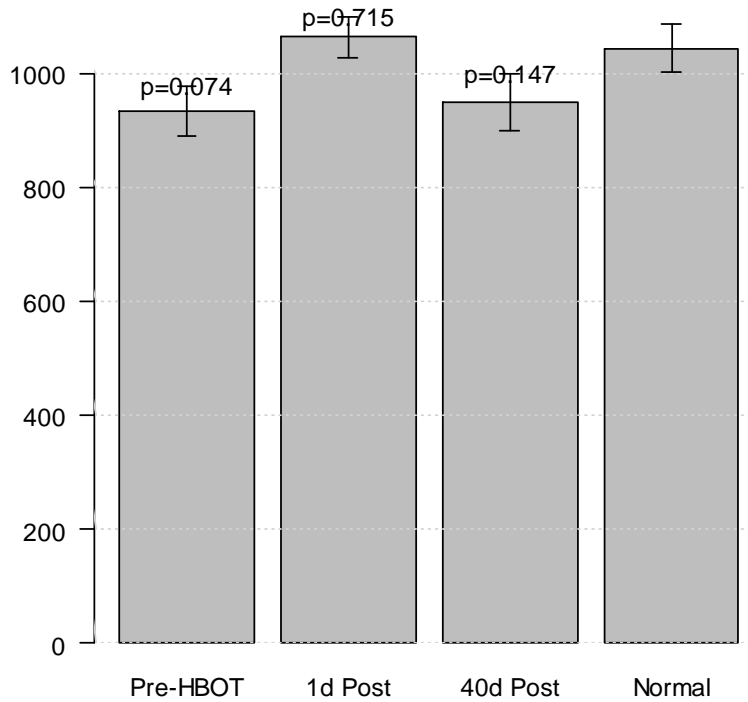

## *Approach of Left White All MCP to Values in Control Subjects*

|     | Pre-HBOT | Post 1   | Post 40 | Control  |
|-----|----------|----------|---------|----------|
| Mns | 950.620  | 1092.035 | 977.918 | 1057.309 |
| SDs | 235.200  | 36.632   | 48.278  | 41.717   |
| SEs | 43.675   | 36.632   | 48.278  | 41.717   |
| Ps  | 0.083    | 0.534    | 0.219   | NA       |

### **Approach of Left White All MCP to Normals**

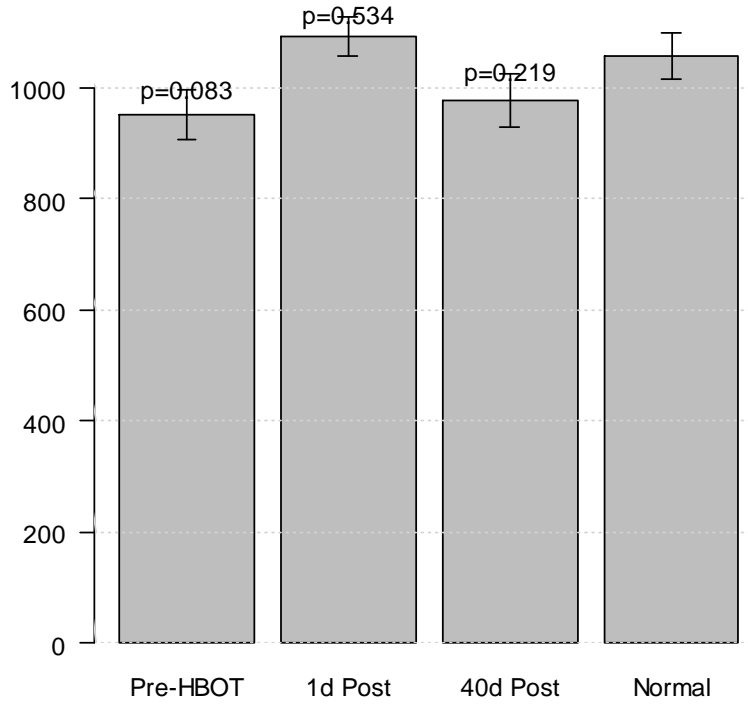

## *Approach of Right Gray 30 MCP to Values in Control Subjects*

|     | Pre-HBOT | Post 1   | Post 40  | Control  |
|-----|----------|----------|----------|----------|
| Mns | 1531.831 | 1564.062 | 1488.843 | 1590.379 |
| SDs | 319.316  | 54.050   | 63.849   | 50.819   |
| SEs | 59.295   | 54.050   | 63.849   | 50.819   |
| Ps  | 0.457    | 0.724    | 0.219    | NA       |

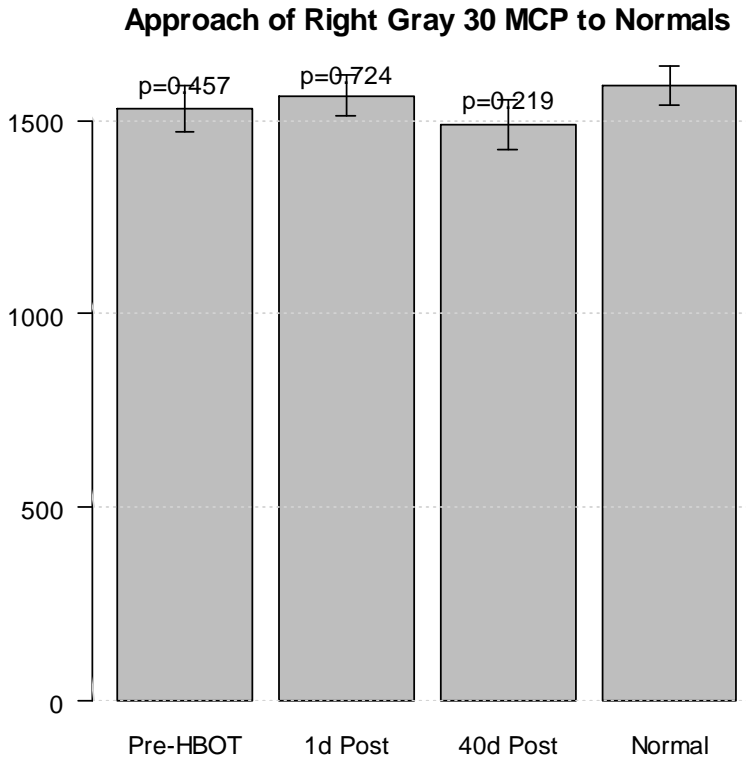

## *Approach of Right Gray 60 MCP to Values in Control Subjects*

|     | Pre-HBOT | Post 1   | Post 40  | Control  |
|-----|----------|----------|----------|----------|
| Mns | 1565.632 | 1622.785 | 1535.245 | 1689.351 |
| SDs | 323.454  | 49.023   | 62.062   | 52.804   |
| SEs | 60.064   | 49.023   | 62.062   | 52.804   |
| Ps  | 0.128    | 0.360    | 0.064    | NA       |

### **Approach of Right Gray 60 MCP to Normals**

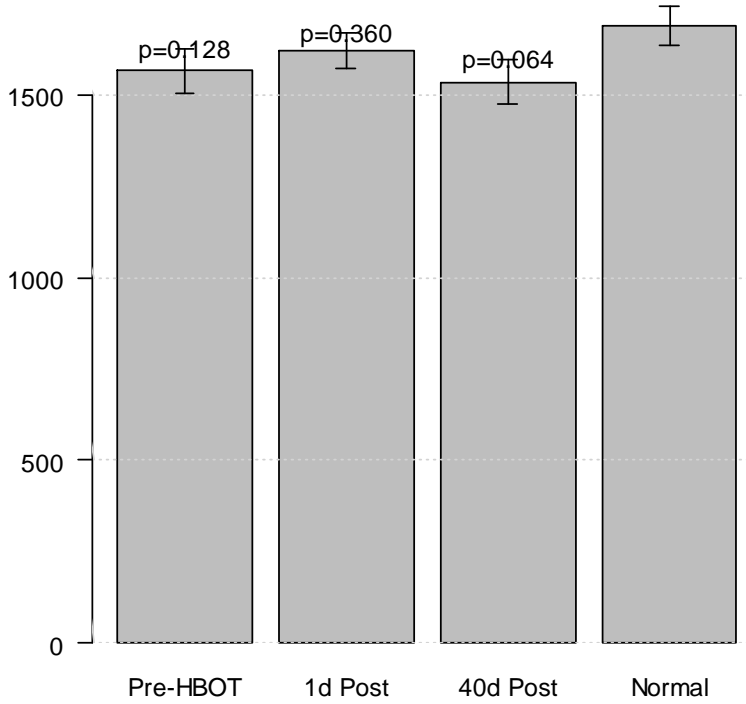

## *Approach of Right Gray 90 MCP to Values in Control Subjects*

|     | Pre-HBOT | Post 1   | Post 40  | Control  |
|-----|----------|----------|----------|----------|
| Mns | 1532.383 | 1590.989 | 1528.879 | 1609.977 |
| SDs | 306.877  | 46.348   | 65.354   | 50.807   |
| SEs | 56.986   | 46.348   | 65.354   | 50.807   |
| Ps  | 0.314    | 0.783    | 0.332    | NA       |

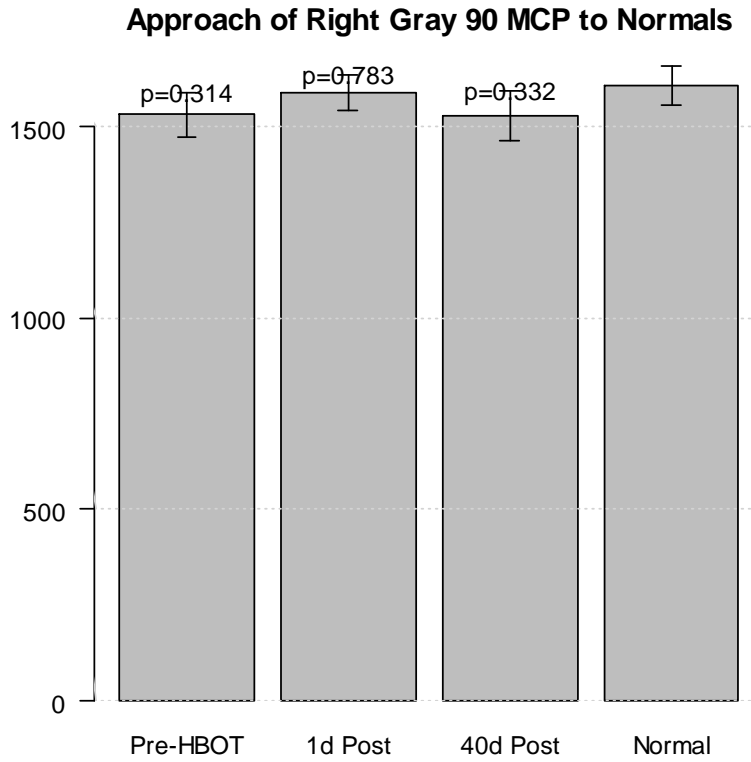

## *Approach of Right Gray 120 MCP to Values in Control Subjects*

|     | Pre-HBOT | Post 1   | Post 40  | Control  |
|-----|----------|----------|----------|----------|
| Mns | 1542.956 | 1621.686 | 1553.024 | 1647.138 |
| SDs | 281.786  | 49.038   | 65.854   | 52.456   |
| SEs | 52.326   | 49.038   | 65.854   | 52.456   |
| Ps  | 0.165    | 0.724    | 0.269    | NA       |

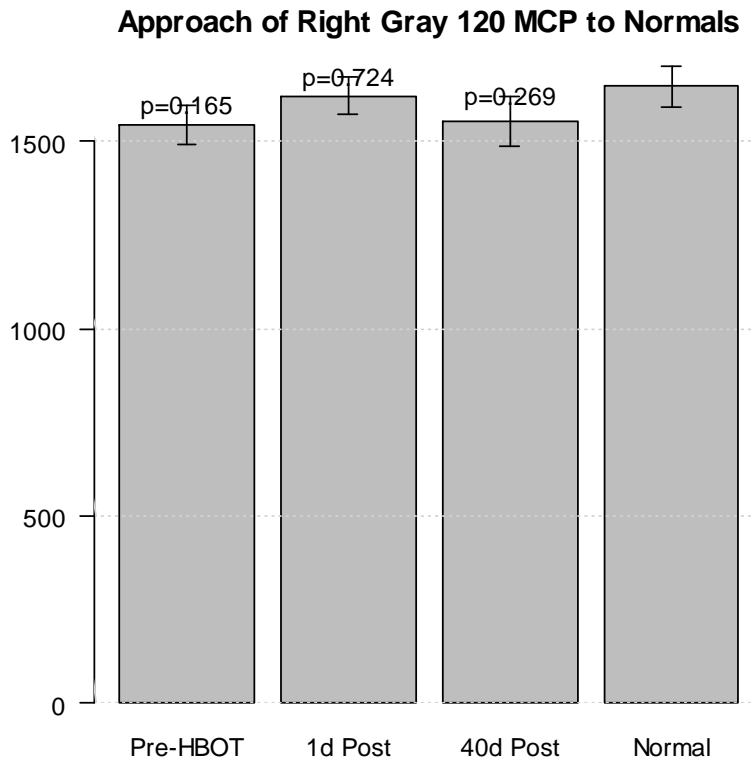

## *Approach of Right Gray 150 MCP to Values in Control Subjects*

|     | Pre-HBOT | Post 1   | Post 40  | Control  |
|-----|----------|----------|----------|----------|
| Mns | 1667.968 | 1704.606 | 1680.358 | 1737.094 |
| SDs | 322.761  | 56.552   | 69.608   | 48.968   |
| SEs | 59.935   | 56.552   | 69.608   | 48.968   |
| Ps  | 0.376    | 0.666    | 0.508    | NA       |

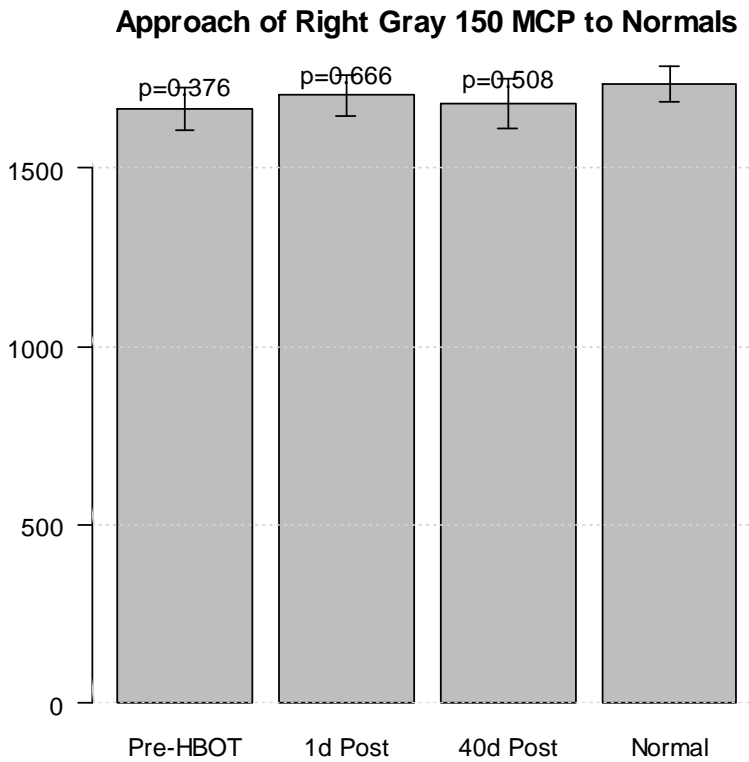

## *Approach of Right Gray All MCP to Values in Control Subjects*

|     | Pre-HBOT | Post 1   | Post 40  | Control  |
|-----|----------|----------|----------|----------|
| Mns | 1568.154 | 1620.825 | 1557.270 | 1654.788 |
| SDs | 302.218  | 48.988   | 63.985   | 49.652   |
| SEs | 56.120   | 48.988   | 63.985   | 49.652   |
| Ps  | 0.253    | 0.628    | 0.234    | NA       |

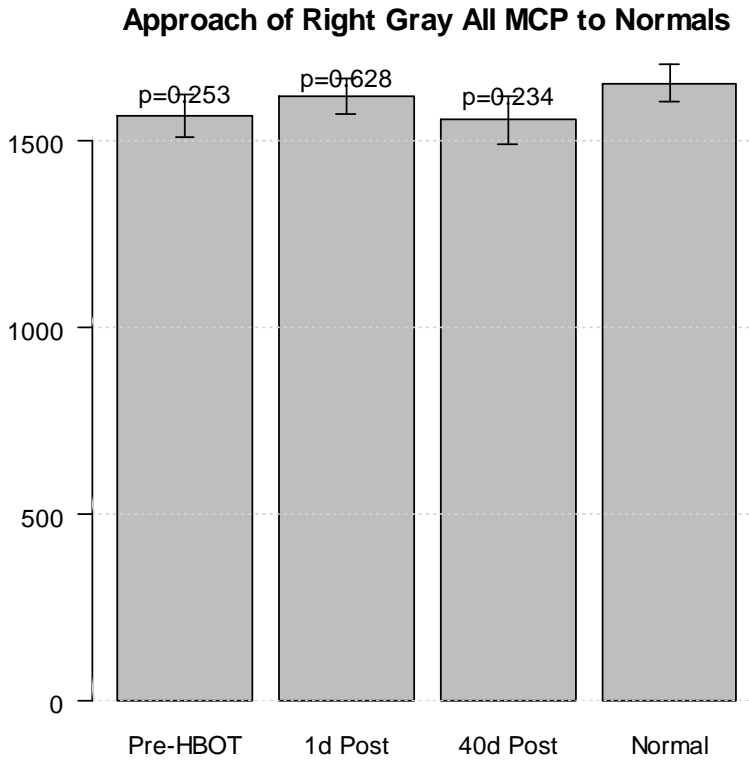



## *Approach of Right White 60 MCP to Values in Control Subjects*

|     | Pre-HBOT | Post 1   | Post 40 | Control  |
|-----|----------|----------|---------|----------|
| Mns | 973.645  | 1077.892 | 976.265 | 1084.157 |
| SDs | 220.437  | 39.030   | 45.931  | 45.253   |
| SEs | 40.934   | 39.030   | 45.931  | 45.253   |
| Ps  | 0.076    | 0.917    | 0.100   | NA       |

### **Approach of Right White 60 MCP to Normals**

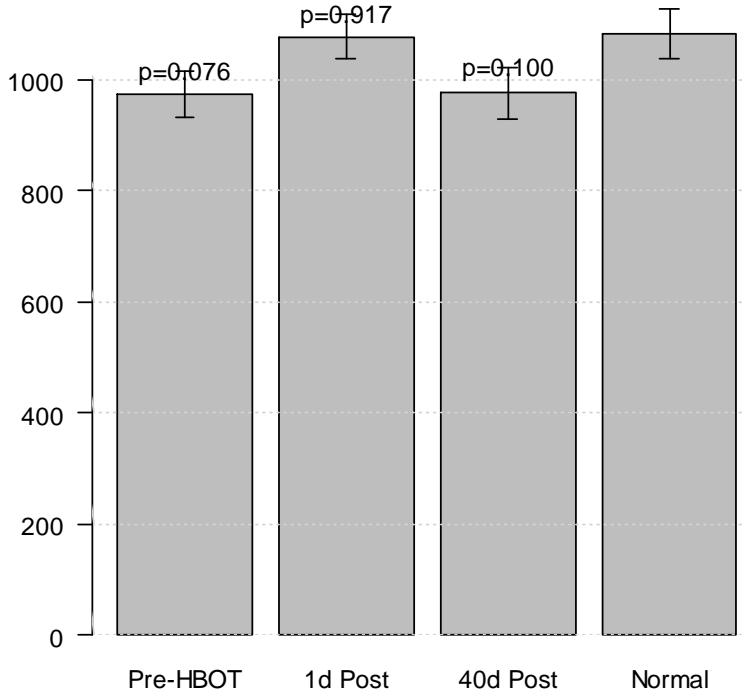

## *Approach of Right White 120 MCP to Values in Control Subjects*

|     | Pre-HBOT | Post 1   | Post 40 | Control  |
|-----|----------|----------|---------|----------|
| Mns | 901.384  | 1028.615 | 922.090 | 1042.945 |
| SDs | 251.012  | 37.458   | 49.612  | 41.470   |
| SEs | 46.612   | 37.458   | 49.612  | 41.470   |
| Ps  | 0.027    | 0.799    | 0.067   | NA       |

### **Approach of Right White 120 MCP to Normals**

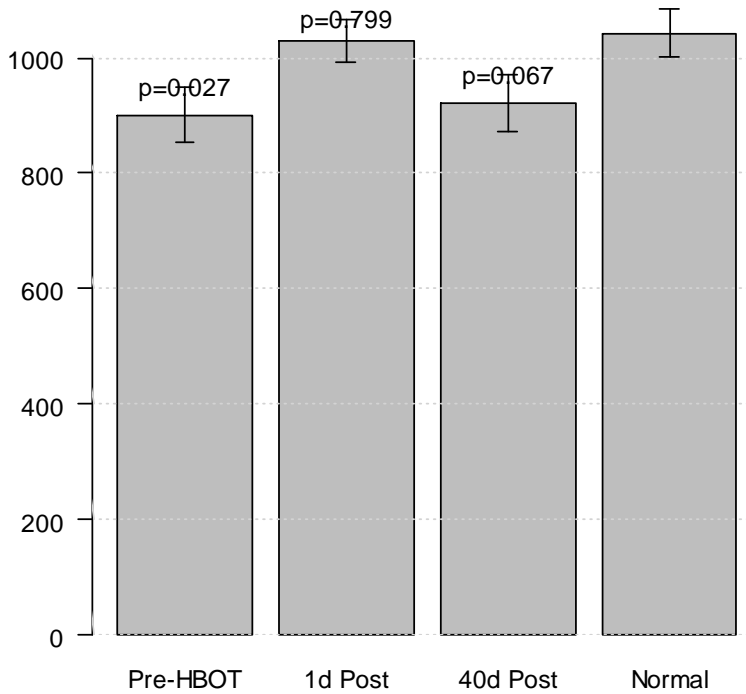

## *Approach of Right White All MCP to Values in Control Subjects*

|     | Pre-HBOT | Post 1   | Post 40 | Control  |
|-----|----------|----------|---------|----------|
| Mns | 937.515  | 1053.254 | 949.178 | 1063.551 |
| SDs | 225.121  | 36.749   | 46.977  | 41.737   |
| SEs | 41.804   | 36.749   | 46.977  | 41.737   |
| Ps  | 0.037    | 0.854    | 0.074   | NA       |

### **Approach of Right White All MCP to Normals**

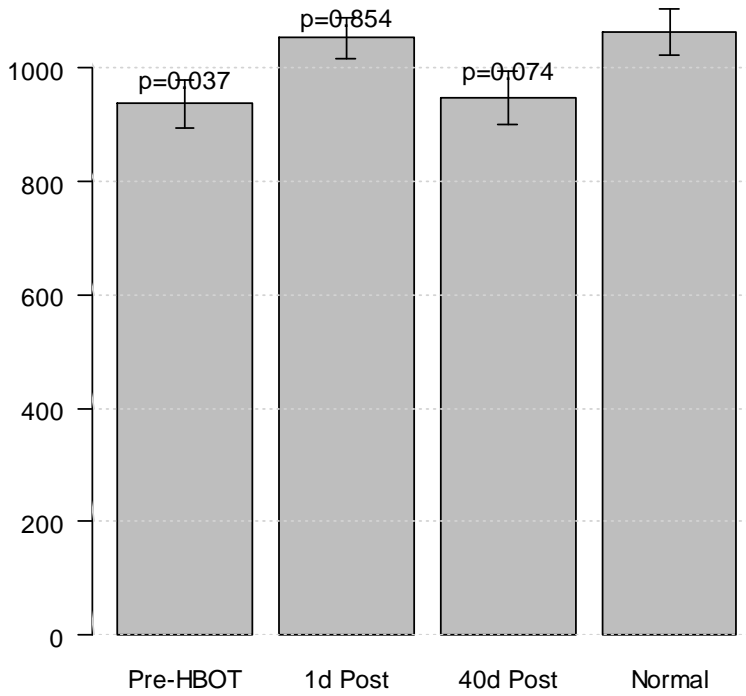

## *Approach of Left Gray 30 CV to Values in Control Subjects*

|         | Pre-HBOT | Post 1 | Post 40 | Control |
|---------|----------|--------|---------|---------|
| Mean    | 3.545    | 2.897  | 3.156   | 3.391   |
| S.D.    | 1.492    | 0.210  | 0.241   | 0.188   |
| S.E.M.  | 0.277    | 0.210  | 0.241   | 0.188   |
| P Value | 0.647    | 0.086  | 0.445   | NA      |

### **Approach of Left Gray 30 to Normals**

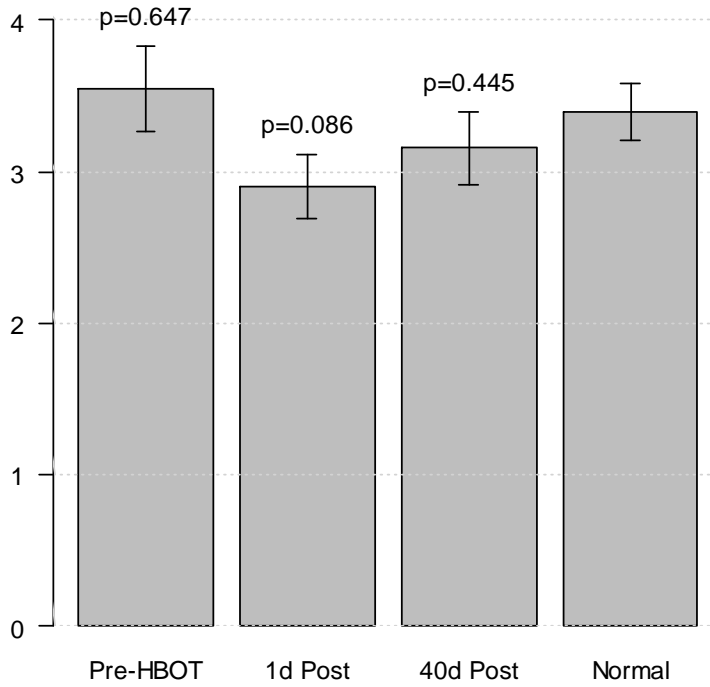

## *Approach of Left Gray 60 CV to Values in Control Subjects*

|         | Pre-HBOT | Post 1 | Post 40 | Control |
|---------|----------|--------|---------|---------|
| Mean    | 4.038    | 3.496  | 3.347   | 3.913   |
| S.D.    | 1.160    | 0.225  | 0.172   | 0.254   |
| S.E.M.  | 0.215    | 0.225  | 0.172   | 0.254   |
| P Value | 0.708    | 0.224  | 0.071   | NA      |

### **Approach of Left Gray 60 to Normals**

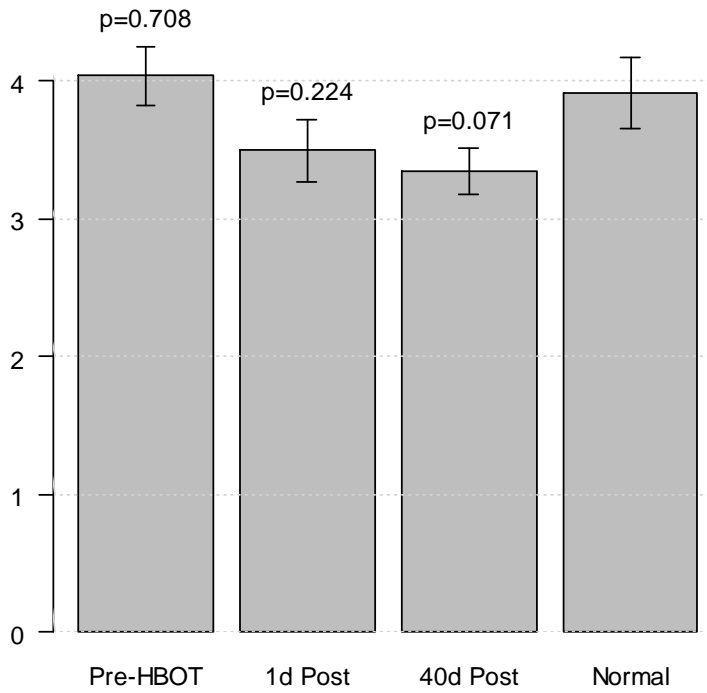

## *Approach of Left Gray 90 CV to Values in Control Subjects*

|         | Pre-HBOT | Post 1 | Post 40 | Control |
|---------|----------|--------|---------|---------|
| Mean    | 3.639    | 3.189  | 3.546   | 4.087   |
| S.D.    | 1.598    | 0.222  | 0.229   | 0.321   |
| S.E.M.  | 0.297    | 0.222  | 0.229   | 0.321   |
| P Value | 0.310    | 0.026  | 0.176   | NA      |

### **Approach of Left Gray 90 to Normals**

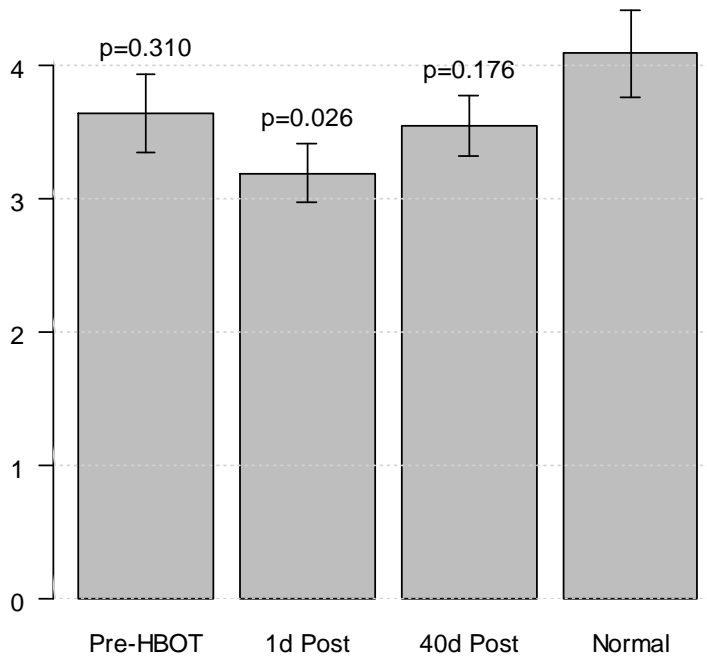

## *Approach of Left Gray 120 CV to Values in Control Subjects*

|         | Pre-HBOT | Post 1 | Post 40 | Control |
|---------|----------|--------|---------|---------|
| Mean    | 3.328    | 2.891  | 3.053   | 3.420   |
| S.D.    | 1.035    | 0.223  | 0.273   | 0.274   |
| S.E.M.  | 0.192    | 0.223  | 0.273   | 0.274   |
| P Value | 0.783    | 0.140  | 0.347   | NA      |

### **Approach of Left Gray 120 to Normals**

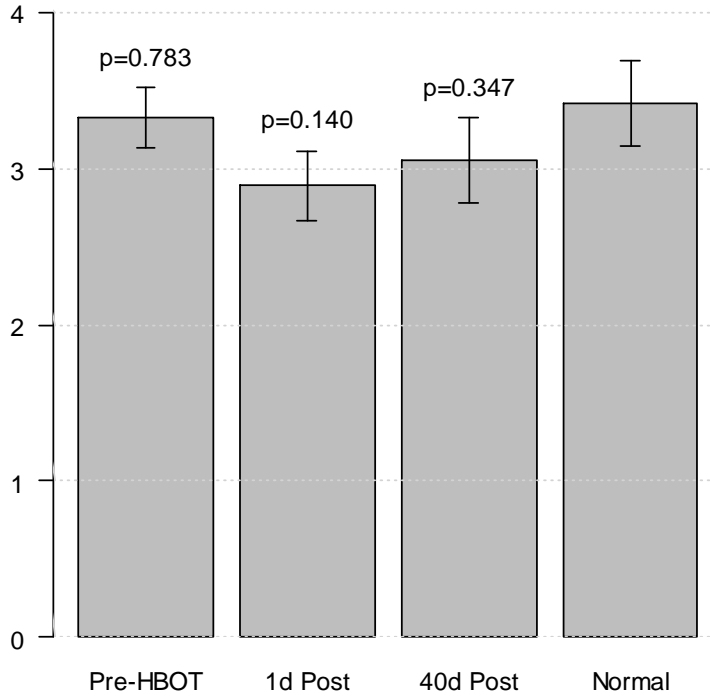

## *Approach of Left Gray 150 CV to Values in Control Subjects*

|         | Pre-HBOT | Post 1 | Post 40 | Control |
|---------|----------|--------|---------|---------|
| Mean    | 4.002    | 3.215  | 3.536   | 3.201   |
| S.D.    | 1.609    | 0.222  | 0.344   | 0.238   |
| S.E.M.  | 0.299    | 0.222  | 0.344   | 0.238   |
| P Value | 0.041    | 0.966  | 0.428   | NA      |

### **Approach of Left Gray 150 to Normals**

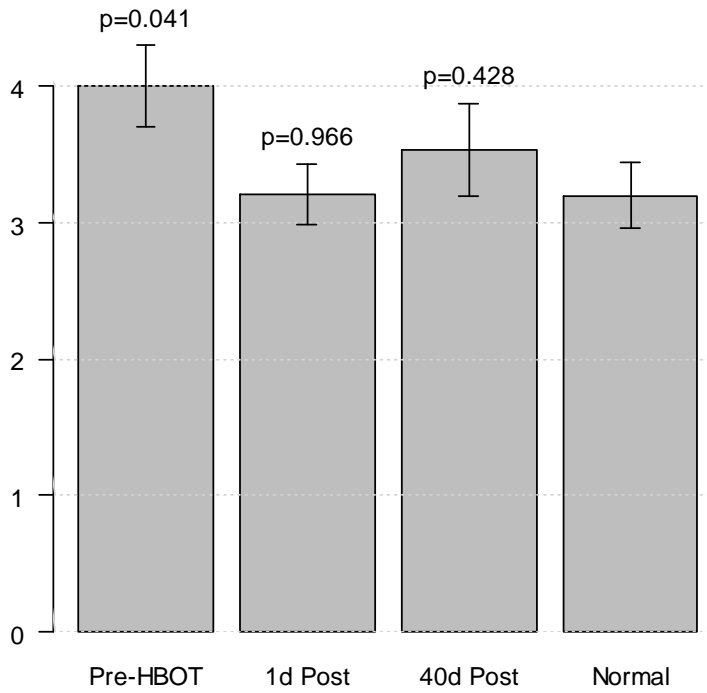



## *Approach of Left Gray All CV to Values in Control Subjects*

|         | Pre-HBOT | Post 1 | Post 40 | Control |
|---------|----------|--------|---------|---------|
| Mean    | 3.710    | 3.138  | 3.328   | 3.603   |
| S.D.    | 0.647    | 0.141  | 0.125   | 0.161   |
| S.E.M.  | 0.120    | 0.141  | 0.125   | 0.161   |
| P Value | 0.594    | 0.034  | 0.183   | NA      |

### **Approach of Left Gray All to Normals**

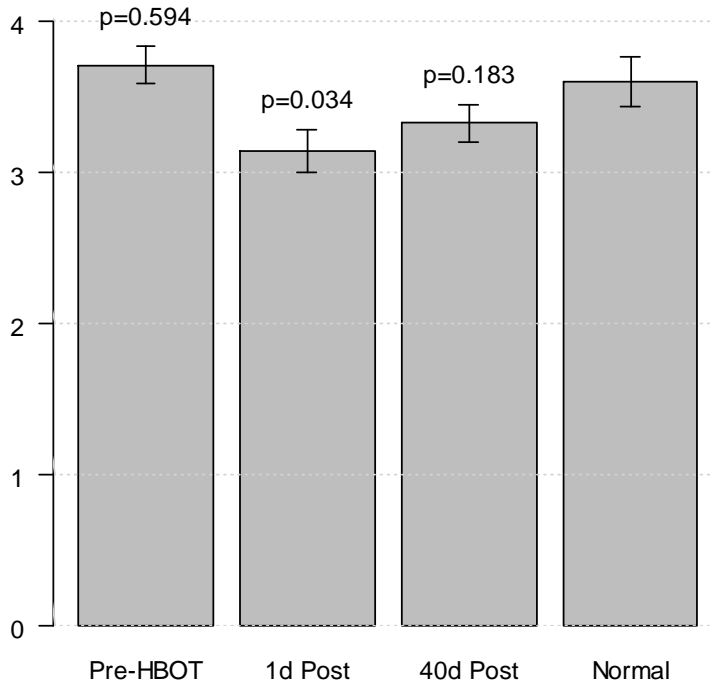

## *Approach of Left White 60 CV to Values in Control Subjects*

|         | Pre-HBOT | Post 1 | Post 40 | Control |
|---------|----------|--------|---------|---------|
| Mean    | 5.853    | 5.427  | 5.318   | 5.320   |
| S.D.    | 2.694    | 0.439  | 0.464   | 0.439   |
| S.E.M.  | 0.500    | 0.439  | 0.464   | 0.439   |
| P Value | 0.427    | 0.864  | 0.997   | NA      |

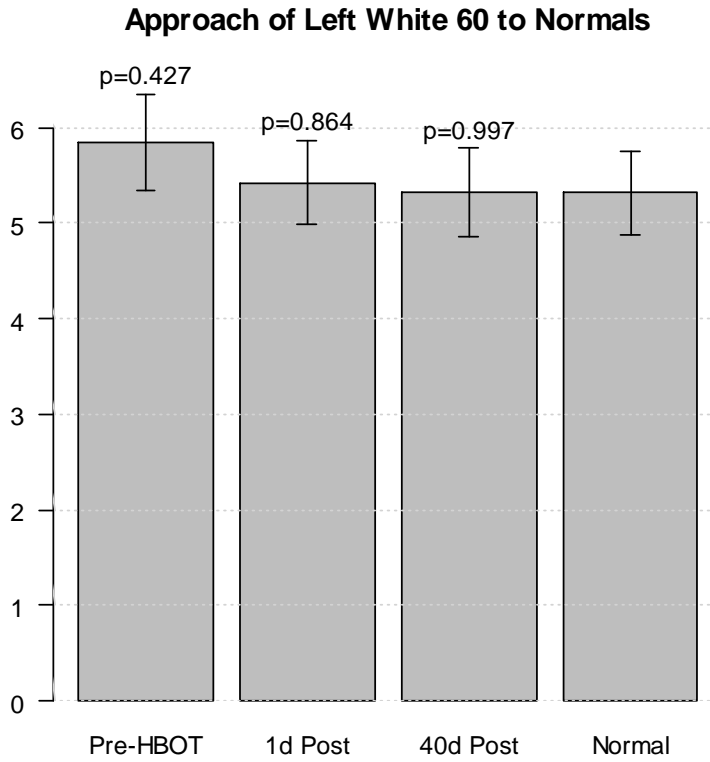

## *Approach of Left White 120 CV to Values in Control Subjects*

|         | Pre-HBOT | Post 1 | Post 40 | Control |
|---------|----------|--------|---------|---------|
| Mean    | 5.872    | 4.984  | 4.808   | 4.550   |
| S.D.    | 2.118    | 0.312  | 0.428   | 0.335   |
| S.E.M.  | 0.393    | 0.312  | 0.428   | 0.335   |
| P Value | 0.013    | 0.348  | 0.638   | NA      |

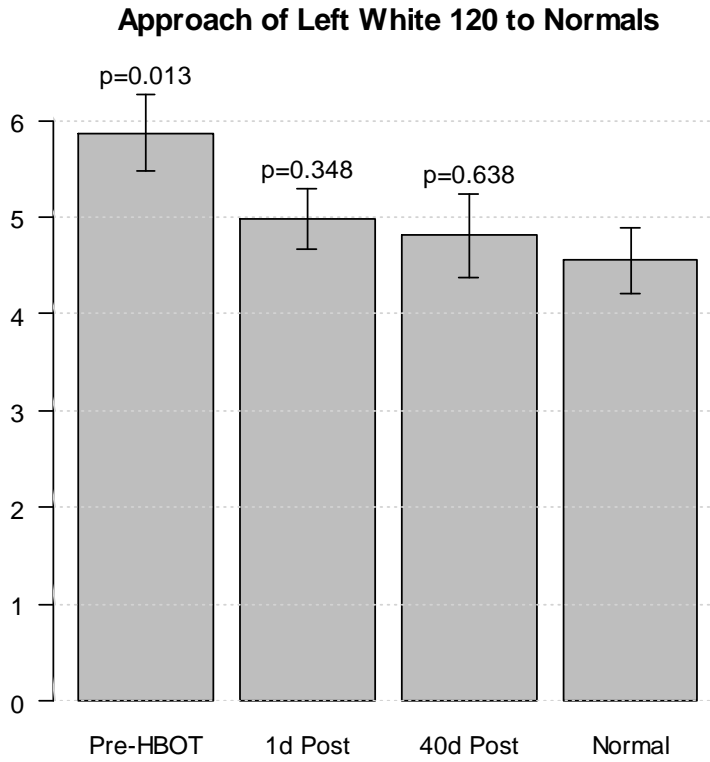

## *Approach of Left White All CV to Values in Control Subjects*

|         | Pre-HBOT | Post 1 | Post 40 | Control |
|---------|----------|--------|---------|---------|
| Mean    | 5.863    | 5.205  | 5.063   | 4.935   |
| S.D.    | 1.855    | 0.247  | 0.336   | 0.285   |
| S.E.M.  | 0.344    | 0.247  | 0.336   | 0.285   |
| P Value | 0.043    | 0.477  | 0.774   | NA      |

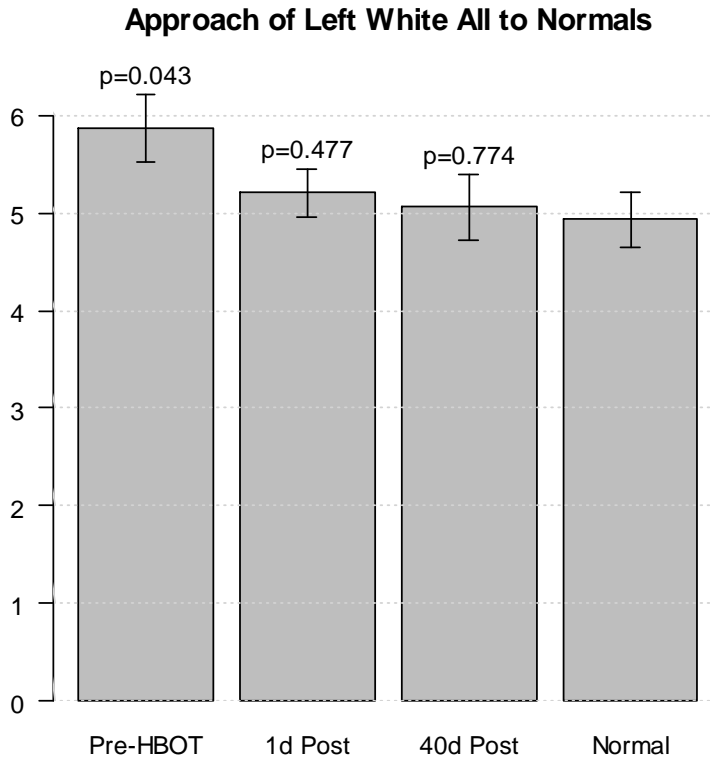

## *Approach of Right Gray 30 CV to Values in Control Subjects*

|         | Pre-HBOT | Post 1 | Post 40 | Control |
|---------|----------|--------|---------|---------|
| Mean    | 3.150    | 2.831  | 2.872   | 3.113   |
| S.D.    | 0.986    | 0.178  | 0.180   | 0.196   |
| S.E.M.  | 0.183    | 0.178  | 0.180   | 0.196   |
| P Value | 0.891    | 0.291  | 0.370   | NA      |

### **Approach of Right Gray 30 to Normals**

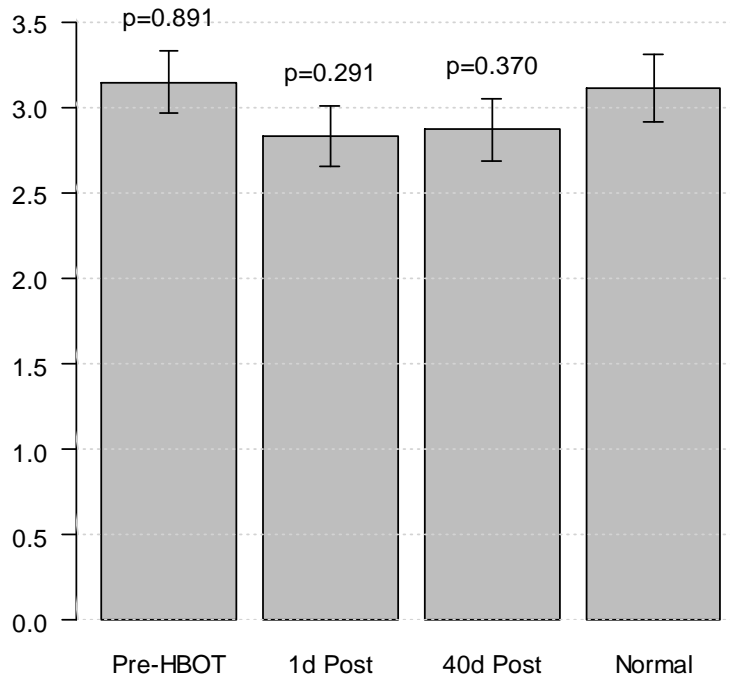

## *Approach of Right Gray 60 CV to Values in Control Subjects*

|         | Pre-HBOT | Post 1 | Post 40 | Control |
|---------|----------|--------|---------|---------|
| Mean    | 3.514    | 3.076  | 3.111   | 3.530   |
| S.D.    | 1.024    | 0.179  | 0.168   | 0.254   |
| S.E.M.  | 0.190    | 0.179  | 0.168   | 0.254   |
| P Value | 0.959    | 0.150  | 0.175   | NA      |

### **Approach of Right Gray 60 to Normals**

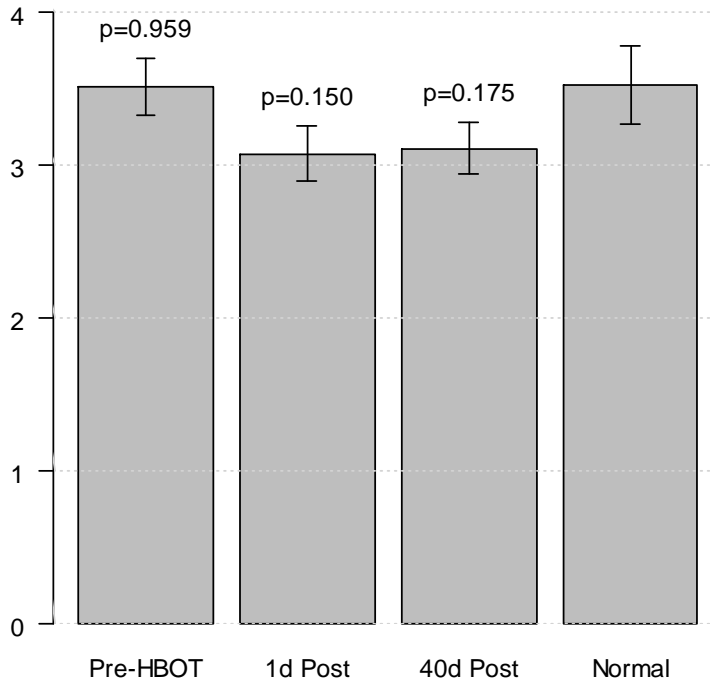

## *Approach of Right Gray 90 CV to Values in Control Subjects*

|         | Pre-HBOT | Post 1 | Post 40 | Control |
|---------|----------|--------|---------|---------|
| Mean    | 3.923    | 3.618  | 4.006   | 3.496   |
| S.D.    | 1.192    | 0.242  | 0.225   | 0.232   |
| S.E.M.  | 0.221    | 0.242  | 0.225   | 0.232   |
| P Value | 0.190    | 0.718  | 0.121   | NA      |

### **Approach of Right Gray 90 to Normals**

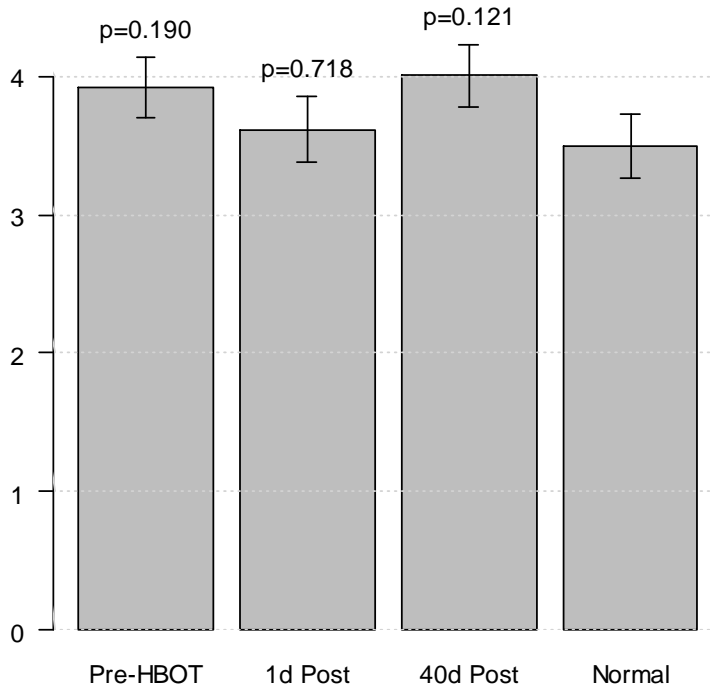

## *Approach of Right Gray 120 CV to Values in Control Subjects*

|         | Pre-HBOT | Post 1 | Post 40 | Control |
|---------|----------|--------|---------|---------|
| Mean    | 3.482    | 3.024  | 3.419   | 3.042   |
| S.D.    | 1.376    | 0.275  | 0.205   | 0.194   |
| S.E.M.  | 0.255    | 0.275  | 0.205   | 0.194   |
| P Value | 0.175    | 0.958  | 0.186   | NA      |

### **Approach of Right Gray 120 to Normals**

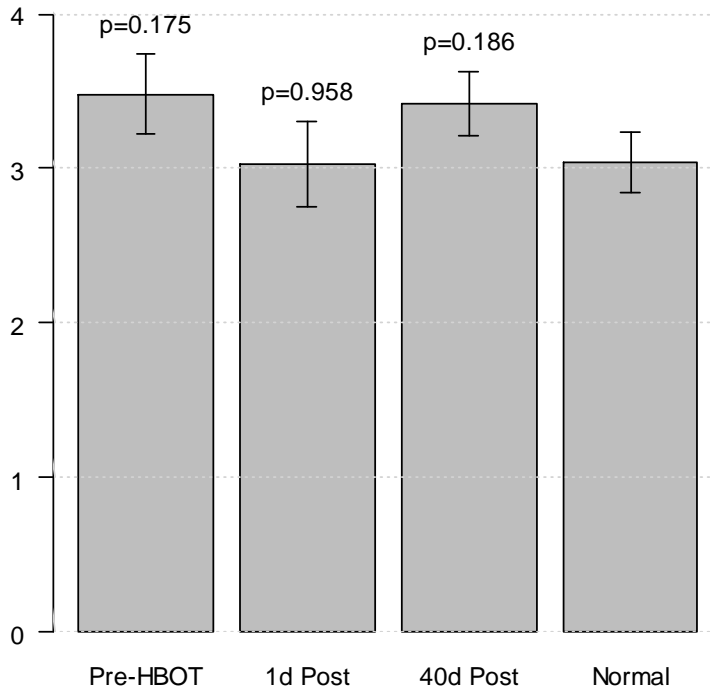



## *Approach of Right Gray 150 CV to Values in Control Subjects*

|         | Pre-HBOT | Post 1 | Post 40 | Control |
|---------|----------|--------|---------|---------|
| Mean    | 3.648    | 3.444  | 3.331   | 2.739   |
| S.D.    | 1.435    | 0.248  | 0.246   | 0.157   |
| S.E.M.  | 0.266    | 0.248  | 0.246   | 0.157   |
| P Value | 0.005    | 0.020  | 0.048   | NA      |

### **Approach of Right Gray 150 to Normals**

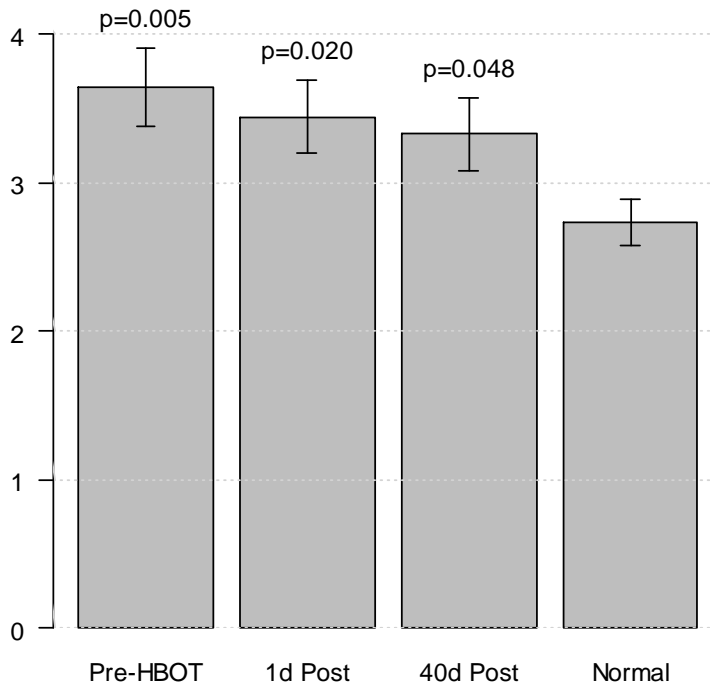

## *Approach of Right Gray All CV to Values in Control Subjects*

|         | Pre-HBOT | Post 1 | Post 40 | Control |
|---------|----------|--------|---------|---------|
| Mean    | 3.543    | 3.199  | 3.348   | 3.184   |
| S.D.    | 0.592    | 0.136  | 0.111   | 0.084   |
| S.E.M.  | 0.110    | 0.136  | 0.111   | 0.084   |
| P Value | 0.012    | 0.928  | 0.245   | NA      |

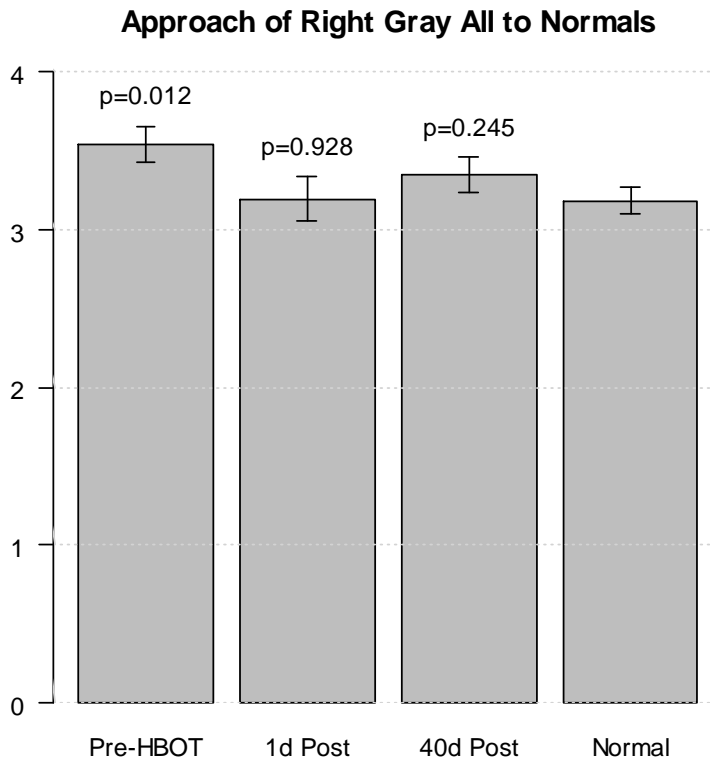

## *Approach of Right White 60 CV to Values in Control Subjects*

|         | Pre-HBOT | Post 1 | Post 40 | Control |
|---------|----------|--------|---------|---------|
| Mean    | 6.523    | 5.533  | 5.336   | 4.991   |
| S.D.    | 2.243    | 0.518  | 0.434   | 0.391   |
| S.E.M.  | 0.417    | 0.518  | 0.434   | 0.391   |
| P Value | 0.010    | 0.408  | 0.557   | NA      |

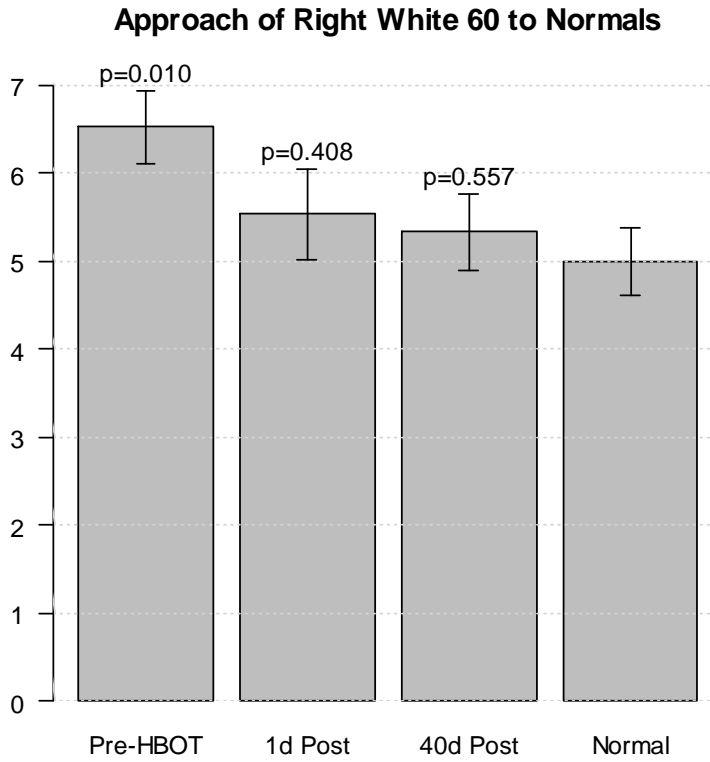

## *Approach of Right White 120 CV to Values in Control Subjects*

|         | Pre-HBOT | Post 1 | Post 40 | Control |
|---------|----------|--------|---------|---------|
| Mean    | 5.758    | 4.910  | 5.337   | 4.182   |
| S.D.    | 1.892    | 0.309  | 0.399   | 0.332   |
| S.E.M.  | 0.351    | 0.309  | 0.399   | 0.332   |
| P Value | 0.002    | 0.114  | 0.030   | NA      |

### **Approach of Right White 120 to Normals**

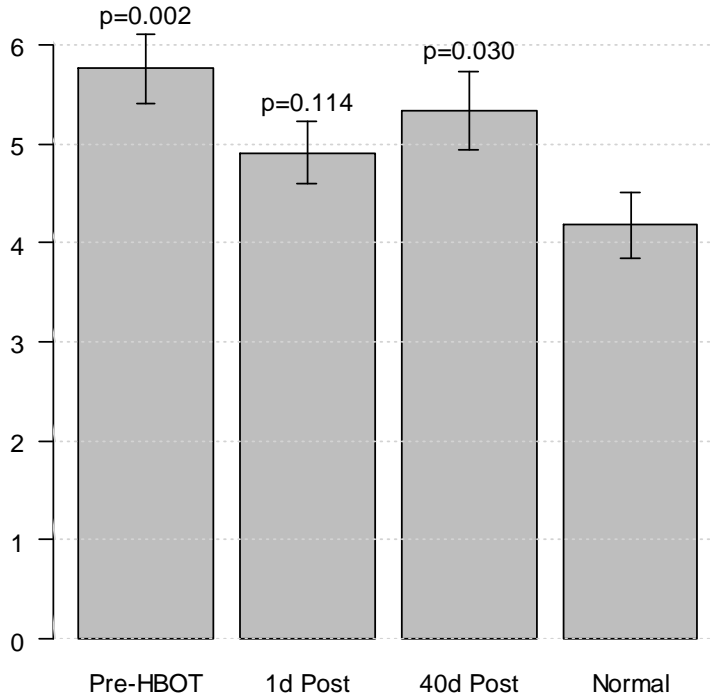

## *Approach of Right White All CV to Values in Control Subjects*

|         | Pre-HBOT | Post 1 | Post 40 | Control |
|---------|----------|--------|---------|---------|
| Mean    | 6.141    | 5.222  | 5.337   | 4.587   |
| S.D.    | 1.521    | 0.321  | 0.368   | 0.221   |
| S.E.M.  | 0.283    | 0.321  | 0.368   | 0.221   |
| P Value | 0.000    | 0.109  | 0.087   | NA      |

### **Approach of Right White All to Normals**

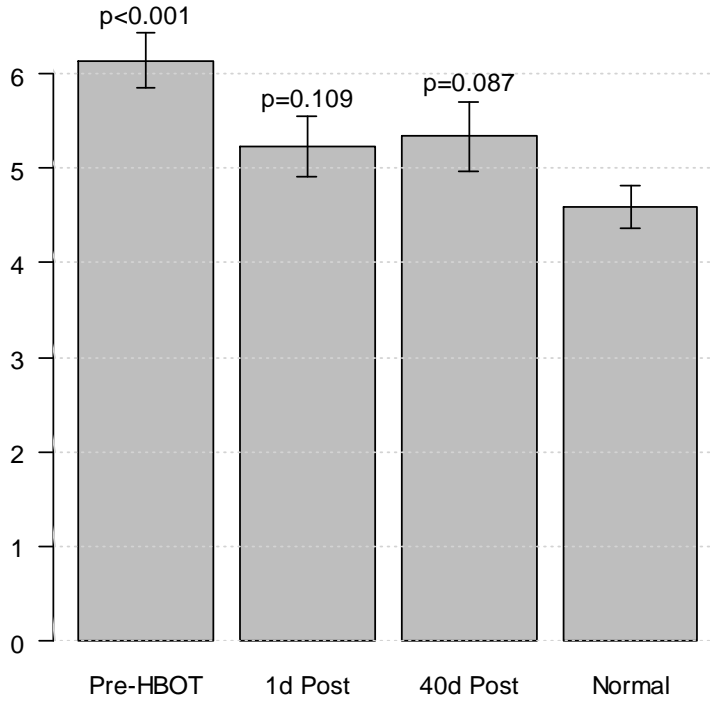

Supplement: MGR-7-156_Suppl6.pdf [file MGR-7-156_Suppl6.pdf]
