# Supplementary material for: Case control study: hyperbaric oxygen treatment of mild traumatic brain injury persistent post-concussion syndrome and post-traumatic stress disorder
Source: PubMed Central journal article supplement — Med Gas Res. 2017 Oct 17;7(3):156–74. doi: 10.4103/2045-9912.215745 (PMC5674654; doi:10.4103/2045-9912.215745), 2017-10-17
Supplement: MGR-7-156_Suppl1.pdf [file MGR-7-156_Suppl1.pdf]

**Additional Table 1: List and Schedule of Psychometric Measures, When Administered, and Domain Measured**

| Instrument                                                                                   | Pre | Post | Domain Measured                        |
|----------------------------------------------------------------------------------------------|-----|------|----------------------------------------|
| Combat Experience Scale (CES)                                                                | X   | -    | Combat experience                      |
| Green Word Memory Test (WMT)                                                                 | X   | -    | Effort                                 |
| Wechsler Test of Adult Reading (WTAR)                                                        | X   | -    | Estimate premorbid IQ                  |
| Michigan Alcohol Screening Test (MAST)                                                       | X   | X    | Alcohol use                            |
| Drug Abuse Screening Test (DAST)                                                             | X   | X    | Drug use                               |
| Rivermead Post Concussion Symptom Questionnaire (RPCSQ)                                      | X   | X    | PCS                                    |
| PTSD Checklist-Military (PCL-M)                                                              | X   | X    | Rating PTSD                            |
| Wechsler Adult Intelligence Scale IV (WAIS-IV)*                                              | X   |      | IQ                                     |
| Wechsler Abbreviated Scale of Intelligence (WASI)                                            |     | X    | IQ                                     |
| Test of Variables of Attention (TOVA)                                                        | X   | X    | Attention                              |
| Stroop Test                                                                                  | X   | X    | Attention, Executive function          |
| Finger Tapping Test                                                                          | X   | X    | Motor speed                            |
| Grooved Pegboard                                                                             | X   | X    | Motor coordination                     |
| Wechsler Memory Scale IV (WMS-IV)*                                                           | X   | X    | Memory, Executive function             |
| Rivermead Paragraph Memory (Paragraph)                                                       | X   | X    | Memory                                 |
| Perceived Quality of Life (PQOL)                                                             | X   | X    | Satisfaction                           |
| Patient Health Questionnaire-9 (PHQ-9)                                                       | X   | X    | Depression                             |
| Generalized Anxiety Disorder-7 (GAD-7)                                                       | X   | X    | Anxiety                                |
| Percent Back To Normal Rating (PBTN) “Current percent of normal premorbid level of function” | X   | X    | Cognitive, Emotional, Physical quality |

\*WAIS-III and WMS III were used on the first 5 subjects, WAIS-IV and WMS-IV on the remaining subjects.
