# Supplementary material for: Case control study: hyperbaric oxygen treatment of mild traumatic brain injury persistent post-concussion syndrome and post-traumatic stress disorder
Source: PubMed Central journal article supplement — Med Gas Res. 2017 Oct 17;7(3):156–74. doi: 10.4103/2045-9912.215745 (PMC5674654; doi:10.4103/2045-9912.215745), 2017-10-17
Supplement: MGR-7-156_Suppl2.pdf [file MGR-7-156_Suppl2.pdf]

## Additional File 1

### Re-Analysis of All Variables by Green Pass/Fail

The following table summarizes the pre-to-post-HBOT changes in all numerical variables, for all affected subjects, for those who passed the WMT, and for those who failed the WMT. Changes are summarized in the format:

Mean  $\pm$  Standard Deviation (# of Subjects)

Median (Minimum – Maximum)

p value for significance of change, by the parametric 1-sample Student t test

For variables measured at only one time point (like Age), the p-value line is not present. The p values in the rightmost column indicate whether the mean values or changes were significantly different between subjects who passed and those who failed the WMT, by the unequal-variance Welch t test.

Significant p values ( $p \leq 0.05$ ) are highlighted in red; near-significant values ( $p < 0.10$ ) are highlighted in orange.

| Variable | All Subjects                                          | Subjects Who Passed WMT                             | Subjects Who Failed WMT                     | p-value Pass vs. Fail |
|----------|-------------------------------------------------------|-----------------------------------------------------|---------------------------------------------|-----------------------|
| Age      | 30.4 ± 7.5 (29)<br>29 (21 – 51)                       | 29.9 ± 7.6 (25)<br>29 (21 – 51)                     | 33.5 ± 7.2 (4)<br>36 (23 – 39)              | 0.381                 |
| MoSvc    | 72 ± 73 (29)<br>42 (9 – 300)                          | 75 ± 77 (25)<br>42 (9 – 300)                        | 54 ± 37 (4)<br>48 (18 – 103)                | 0.603                 |
| PriorTBI | 1.28 ± 2.14 (29)<br>1 (0 – 10)                        | 1.48 ± 2.24 (25)<br>1 (0 – 10)                      | 0.00 ± 0.00 (4)<br>0 (0 – 0)                | 0.204                 |
| Blasts   | 4.5 ± 6.3 (29)<br>2 (1 – 25)                          | 4.8 ± 6.8 (25)<br>1 (1 – 25)                        | 2.8 ± 1.7 (4)<br>2.5 (1 – 5)                | 0.566                 |
| Delay    | 3.35 ± 1.21 (29)<br>3.25 (1.25 – 5.83)                | 3.16 ± 1.17 (25)<br>3.08 (1.25 – 5.83)              | 4.56 ± 0.77 (4)<br>4.71 (3.5 – 5.33)        | <b>0.029</b>          |
| Tobacco  | 0.27 ± 0.50 (29)<br>0 (0 – 2)                         | 0.31 ± 0.53 (25)<br>0 (0 – 2)                       | 0.03 ± 0.05 (4)<br>0 (0 – 0.1)              | 0.297                 |
| Educ     | 13.02 ± 2.01 (29)<br>12 (9 – 19)                      | 12.98 ± 2.10 (25)<br>12 (9 – 19)                    | 13.25 ± 1.50 (4)<br>13 (12 – 15)            | 0.808                 |
| HBOTn    | 39.72 ± 0.65 (29)<br>40 (38 – 40)                     | 39.76 ± 0.60 (25)<br>40 (38 – 40)                   | 39.50 ± 1.00 (4)<br>40 (38 – 40)            | 0.467                 |
| HBOTd    | 30.9 ± 4.5 (29)<br>30 (23 – 44)                       | 31.3 ± 4.7 (25)<br>30 (23 – 44)                     | 28.3 ± 1.3 (4)<br>28 (27 – 30)              | 0.218                 |
| GreenIR  | 89.2 ± 12.1 (29)<br>90 (58 – 100)                     | 93.2 ± 6.6 (25)<br>95 (80 – 100)                    | 64.0 ± 6.7 (4)<br>62.5 (58 – 73)            | <b>&lt; 0.001</b>     |
| GreenDR  | 88.6 ± 11.6 (29)<br>93 (60 – 100)                     | 92.3 ± 7.0 (25)<br>93 (75 – 100)                    | 65.3 ± 4.6 (4)<br>65.5 (60 – 70)            | <b>&lt; 0.001</b>     |
| GreenCNS | 85.6 ± 13.8 (29)<br>88 (55 – 100)                     | 89.9 ± 8.9 (25)<br>90 (73 – 100)                    | 58.8 ± 4.8 (4)<br>57.5 (55 – 65)            | <b>&lt; 0.001</b>     |
| GreenMC  | 77.5 ± 18.1 (29)<br>85 (40 – 100)                     | 81.9 ± 15.2 (25)<br>85 (50 – 100)                   | 50.0 ± 8.2 (4)<br>50 (40 – 60)              | <b>&lt; 0.001</b>     |
| GreenFR  | 51.9 ± 21.9 (29)<br>48 (13 – 100)                     | 55.5 ± 21.0 (25)<br>53 (20 – 100)                   | 29.5 ± 13.7 (4)<br>30 (13 – 45)             | <b>0.025</b>          |
| AMI      | 2.8 ± 11.9 (24)<br>5.5 (-26 – 22)<br>p = 0.264        | 2.4 ± 11.9 (21)<br>6 (-26 – 19)<br>p = 0.361        | 5.3 ± 14.6 (3)<br>-1 (-5 – 22)<br>p = 0.591 | 0.703                 |
| VMI      | 3.9 ± 13.8 (24)<br>3 (-30 – 30)<br>p = 0.177          | 3.7 ± 14.7 (21)<br>3 (-30 – 30)<br>p = 0.260        | 5.3 ± 4.9 (3)<br>3 (2 – 11)<br>p = 0.202    | 0.854                 |
| VWMI     | 6.8 ± 10.0 (24)<br>7.5 (-18 – 25)<br><b>p = 0.003</b> | 7.3 ± 10.1 (21)<br>8 (-18 – 25)<br><b>p = 0.004</b> | 3.7 ± 10.0 (3)<br>0 (-4 – 15)<br>p = 0.591  | 0.569                 |
| DMI      | 5.7 ± 12.0 (24)<br>5.5 (-21 – 26)<br><b>p = 0.029</b> | 5.9 ± 12.1 (21)<br>6 (-21 – 26)<br><b>p = 0.039</b> | 4.3 ± 12.9 (3)<br>-1 (-5 – 19)<br>p = 0.618 | 0.842                 |

| Variable | All Subjects                                             | Subjects Who Passed WMT                                  | Subjects Who Failed WMT                               | p-value Pass vs. Fail |
|----------|----------------------------------------------------------|----------------------------------------------------------|-------------------------------------------------------|-----------------------|
| IQ       | 14.2 ± 10.3 (29)<br>15 (-9 – 47)<br><b>p &lt; 0.001</b>  | 12.4 ± 8.5 (25)<br>12 (-9 – 30)<br><b>p &lt; 0.001</b>   | 25.3 ± 14.7 (4)<br>19 (16 – 47)<br><b>p = 0.041</b>   | <b>0.018</b>          |
| DelWMS   | 15.2 ± 13.9 (29)<br>17 (-19 – 38)<br><b>p &lt; 0.001</b> | 15.4 ± 13.7 (25)<br>17 (-19 – 38)<br><b>p &lt; 0.001</b> | 13.5 ± 17.1 (4)<br>10.5 (-3 – 36)<br>p = 0.213        | 0.800                 |
| WrkWMS   | 11.3 ± 10.5 (29)<br>10 (-15 – 32)<br><b>p &lt; 0.001</b> | 11.3 ± 10.7 (25)<br>10 (-15 – 32)<br><b>p &lt; 0.001</b> | 11.5 ± 10.3 (4)<br>6.5 (6 – 27)<br>p = 0.113          | 0.975                 |
| Stroop   | 10.9 ± 12.2 (29)<br>10 (-10 – 39)<br><b>p &lt; 0.001</b> | 9.6 ± 11.4 (25)<br>10 (-10 – 29)<br><b>p &lt; 0.001</b>  | 19.0 ± 15.3 (4)<br>17.5 (2 – 39)<br><b>p = 0.090</b>  | 0.154                 |
| TOVAVar  | 8.6 ± 25.3 (29)<br>8 (-70 – 48)<br><b>p = 0.078</b>      | 6.1 ± 25.5 (25)<br>3 (-70 – 45)<br>p = 0.243             | 24.3 ± 19.9 (4)<br>24.5 (0 – 48)<br><b>p = 0.093</b>  | 0.189                 |
| QOL      | 28 ± 32 (29)<br>24 (-37 – 96)<br><b>p &lt; 0.001</b>     | 28 ± 33 (25)<br>24 (-37 – 96)<br><b>p &lt; 0.001</b>     | 28 ± 35 (4)<br>18 (-3 – 77)<br>p = 0.212              | 0.978                 |
| PHQ9Dep  | -7.9 ± 6.8 (29)<br>-7 (-21 – 5)<br><b>p &lt; 0.001</b>   | -7.5 ± 6.9 (25)<br>-6 (-21 – 5)<br><b>p &lt; 0.001</b>   | -10.3 ± 6.2 (4)<br>-13 (-14 – -1)<br><b>p = 0.046</b> | 0.465                 |
| GAD7Anx  | -5.4 ± 5.9 (29)<br>-5 (-14 – 4)<br><b>p &lt; 0.001</b>   | -5.2 ± 5.9 (25)<br>-5 (-14 – 4)<br><b>p &lt; 0.001</b>   | -6.8 ± 7.3 (4)<br>-6.5 (-14 – 0)<br>p = 0.160         | 0.646                 |
| CogPBN   | 20.4 ± 17.4 (29)<br>15 (-10 – 50)<br><b>p &lt; 0.001</b> | 20.6 ± 18.3 (25)<br>15 (-10 – 50)<br><b>p &lt; 0.001</b> | 19.5 ± 11.4 (4)<br>17.5 (8 – 35)<br><b>p = 0.042</b>  | 0.909                 |
| PhysPBN  | 20.7 ± 16.2 (29)<br>20 (-10 – 55)<br><b>p &lt; 0.001</b> | 19.8 ± 17.1 (25)<br>20 (-10 – 55)<br><b>p &lt; 0.001</b> | 26.3 ± 7.5 (4)<br>25 (20 – 35)<br><b>p = 0.006</b>    | 0.469                 |
| EmoPBN   | 31.1 ± 18.9 (29)<br>30 (5 – 80)<br><b>p &lt; 0.001</b>   | 30.8 ± 19.2 (25)<br>30 (5 – 80)<br><b>p &lt; 0.001</b>   | 32.5 ± 18.9 (4)<br>25 (20 – 60)<br><b>p = 0.041</b>   | 0.874                 |
| Inatt    | 8.0 ± 27.8 (29)<br>0 (-62 – 61)<br>p = 0.134             | 7.7 ± 29.7 (25)<br>0 (-62 – 61)<br>p = 0.206             | 9.5 ± 11.2 (4)<br>8 (0 – 22)<br>p = 0.190             | 0.908                 |
| Impls    | 11.9 ± 20.2 (29)<br>8 (-25 – 60)<br><b>p = 0.004</b>     | 14.1 ± 20.6 (25)<br>15 (-25 – 60)<br><b>p = 0.002</b>    | -2.3 ± 10.7 (4)<br>2 (-18 – 5)<br>p = 0.703           | 0.135                 |
| RxTm     | 3.5 ± 18.2 (29)<br>5 (-32 – 43)<br>p = 0.312             | 1.5 ± 18.6 (25)<br>3 (-32 – 43)<br>p = 0.695             | 16.0 ± 9.1 (4)<br>13.5 (8 – 29)<br><b>p = 0.039</b>   | 0.142                 |

| Variable | All Subjects                                                  | Subjects Who Passed WMT                                       | Subjects Who Failed WMT                                  | p-value Pass vs. Fail |
|----------|---------------------------------------------------------------|---------------------------------------------------------------|----------------------------------------------------------|-----------------------|
| TapD     | 6.4 ± 16.0 (29)<br>5 (-20 – 68)<br><b>p = 0.040</b>           | 6.2 ± 16.8 (25)<br>5 (-20 – 68)<br><b>p = 0.077</b>           | 7.8 ± 11.3 (4)<br>3.5 (0 – 24)<br>p = 0.265              | 0.861                 |
| TapND    | 4.5 ± 14.7 (29)<br>1 (-18 – 57)<br>p = 0.111                  | 3.2 ± 14.8 (25)<br>0 (-18 – 57)<br>p = 0.297                  | 12.8 ± 12.1 (4)<br>9 (3 – 30)<br>p = 0.126               | 0.231                 |
| PegD     | 11.2 ± 13.9 (29)<br>9 (-14 – 33)<br><b>p &lt; 0.001</b>       | 11.0 ± 14.2 (25)<br>9 (-14 – 33)<br><b>p &lt; 0.001</b>       | 12.5 ± 13.4 (4)<br>9.5 (0 – 31)<br>p = 0.160             | 0.841                 |
| PegND    | 4.2 ± 13.6 (29)<br>3 (-30 – 36)<br>p = 0.105                  | 2.7 ± 12.1 (25)<br>3 (-30 – 25)<br>p = 0.281                  | 14.0 ± 20.2 (4)<br>13 (-6 – 36)<br>p = 0.260             | 0.125                 |
| Parag    | -0.9 ± 4.6 (29)<br>-1 (-14 – 8)<br>p = 0.324                  | -0.8 ± 4.9 (25)<br>0 (-14 – 8)<br>p = 0.449                   | -1.5 ± 2.1 (4)<br>-1.5 (-4 – 1)<br>p = 0.245             | 0.772                 |
| RPCSQ    | -13.5 ± 10.4 (29)<br>-13 (-38 – 12)<br><b>p &lt; 0.001</b>    | -13.7 ± 11.0 (25)<br>-13 (-38 – 12)<br><b>p &lt; 0.001</b>    | -12.5 ± 7.0 (4)<br>-13.5 (-20 – -3)<br><b>p = 0.038</b>  | 0.838                 |
| PCLM     | -16.6 ± 16.2 (29)<br>-16 (-54 – 10)<br><b>p &lt; 0.001</b>    | -15.8 ± 16.5 (25)<br>-15 (-54 – 10)<br><b>p &lt; 0.001</b>    | -21.5 ± 15.0 (4)<br>-24.5 (-36 – -1)<br><b>p = 0.064</b> | 0.525                 |
| LG030    | -0.39 ± 1.59 (29)<br>-0.14 (-3.96 – 2.5)<br>p = 0.198         | -0.27 ± 1.62 (25)<br>-0.04 (-3.96 – 2.5)<br>p = 0.414         | -1.13 ± 1.29 (4)<br>-0.69 (-3.03 – -0.14)<br>p = 0.177   | 0.322                 |
| LG060    | -0.69 ± 1.23 (29)<br>-0.86 (-2.7 – 2.27)<br><b>p = 0.005</b>  | -0.72 ± 1.28 (25)<br>-0.86 (-2.7 – 2.27)<br><b>p = 0.009</b>  | -0.50 ± 1.03 (4)<br>-0.47 (-1.48 – 0.44)<br>p = 0.407    | 0.740                 |
| LG090    | -0.09 ± 1.75 (29)<br>0 (-3.71 – 3.66)<br>p = 0.779            | 0.04 ± 1.79 (25)<br>0.14 (-3.71 – 3.66)<br>p = 0.904          | -0.94 ± 1.39 (4)<br>-1 (-2.48 – 0.71)<br>p = 0.267       | 0.304                 |
| LG120    | -0.27 ± 2.12 (29)<br>-0.8 (-3.33 – 4.54)<br>p = 0.491         | -0.52 ± 2.01 (25)<br>-0.91 (-3.33 – 4.54)<br>p = 0.213        | 1.23 ± 2.45 (4)<br>2.32 (-2.43 – 2.7)<br>p = 0.390       | 0.129                 |
| LG150    | -0.47 ± 2.21 (29)<br>0.19 (-4.6 – 3.55)<br>p = 0.265          | -0.43 ± 2.23 (25)<br>0.19 (-4.6 – 3.55)<br>p = 0.341          | -0.68 ± 2.40 (4)<br>0.04 (-3.96 – 1.18)<br>p = 0.613     | 0.842                 |
| LGAll    | -0.38 ± 0.95 (29)<br>-0.57 (-2.27 – 1.66)<br><b>p = 0.039</b> | -0.38 ± 0.92 (25)<br>-0.59 (-1.93 – 1.66)<br><b>p = 0.051</b> | -0.40 ± 1.29 (4)<br>0.07 (-2.27 – 0.5)<br>p = 0.575      | 0.962                 |
| LW060    | -0.54 ± 2.75 (29)<br>-0.7 (-7.97 – 4.85)<br>p = 0.303         | -0.68 ± 2.84 (25)<br>-0.7 (-7.97 – 4.85)<br>p = 0.241         | 0.38 ± 2.18 (4)<br>-0.33 (-1.36 – 3.54)<br>p = 0.749     | 0.481                 |

| Variable | All Subjects                                                  | Subjects Who Passed WMT                                       | Subjects Who Failed WMT                                       | p-value Pass vs. Fail |
|----------|---------------------------------------------------------------|---------------------------------------------------------------|---------------------------------------------------------------|-----------------------|
| LW120    | -1.06 ± 2.74 (29)<br>-0.87 (-6.12 – 4.88)<br><b>p = 0.046</b> | -1.23 ± 2.80 (25)<br>-1.73 (-6.12 – 4.88)<br><b>p = 0.038</b> | -0.02 ± 2.39 (4)<br>0.77 (-3.4 – 1.8)<br>p = 0.989            | 0.421                 |
| LWAI     | -0.80 ± 2.23 (29)<br>-0.79 (-5.26 – 3.11)<br><b>p = 0.064</b> | -0.96 ± 2.27 (25)<br>-1.06 (-5.26 – 3.11)<br><b>p = 0.046</b> | 0.18 ± 1.88 (4)<br>0.12 (-2.05 – 2.54)<br>p = 0.858           | 0.352                 |
| RG030    | -0.28 ± 1.52 (29)<br>-0.57 (-3.84 – 3.19)<br>p = 0.333        | -0.18 ± 1.23 (25)<br>-0.36 (-2.32 – 1.81)<br>p = 0.483        | -0.92 ± 2.96 (4)<br>-1.51 (-3.84 – 3.19)<br>p = 0.579         | 0.374                 |
| RG060    | -0.40 ± 1.33 (29)<br>-0.51 (-2.7 – 3.38)<br>p = 0.114         | -0.23 ± 1.33 (25)<br>-0.38 (-2.7 – 3.38)<br>p = 0.400         | -1.49 ± 0.70 (4)<br>-1.47 (-2.37 – -0.67)<br>p = 0.023        | <b>0.077</b>          |
| RG090    | 0.08 ± 1.32 (29)<br>0.04 (-3.53 – 3.35)<br>p = 0.736          | 0.10 ± 0.96 (25)<br>0.04 (-2.03 – 2.37)<br>p = 0.614          | -0.01 ± 2.97 (4)<br>0.06 (-3.53 – 3.35)<br>p = 0.994          | 0.881                 |
| RG120    | -0.06 ± 1.80 (29)<br>0.05 (-4.63 – 2.75)<br>p = 0.851         | -0.26 ± 1.79 (25)<br>-0.2 (-4.63 – 2.75)<br>p = 0.476         | 1.16 ± 1.47 (4)<br>1.32 (-0.75 – 2.75)<br>p = 0.212           | 0.144                 |
| RG150    | -0.32 ± 1.35 (29)<br>-0.46 (-2.84 – 1.97)<br>p = 0.217        | -0.45 ± 1.30 (25)<br>-0.64 (-2.84 – 1.97)<br><b>p = 0.096</b> | 0.52 ± 1.57 (4)<br>1.11 (-1.76 – 1.61)<br>p = 0.556           | 0.188                 |
| RGAI     | -0.20 ± 0.59 (29)<br>-0.3 (-1.25 – 0.91)<br><b>p = 0.087</b>  | -0.20 ± 0.61 (25)<br>-0.17 (-1.25 – 0.91)<br>p = 0.111        | -0.15 ± 0.52 (4)<br>-0.32 (-0.58 – 0.62)<br>p = 0.612         | 0.867                 |
| RW060    | -1.19 ± 2.92 (29)<br>-1.25 (-6.92 – 5.58)<br><b>p = 0.037</b> | -0.84 ± 2.87 (25)<br>-0.79 (-6.92 – 5.58)<br>p = 0.157        | -3.36 ± 2.51 (4)<br>-3.06 (-6.58 – -0.73)<br><b>p = 0.075</b> | 0.110                 |
| RW120    | -0.42 ± 2.73 (29)<br>0.1 (-4.6 – 5.55)<br>p = 0.413           | -0.41 ± 2.81 (25)<br>-0.31 (-4.6 – 5.55)<br>p = 0.473         | -0.50 ± 2.55 (4)<br>0.53 (-4.25 – 1.21)<br>p = 0.722          | 0.953                 |
| RWAI     | -0.80 ± 2.30 (29)<br>-1.03 (-4.59 – 4.28)<br><b>p = 0.070</b> | -0.62 ± 2.35 (25)<br>-1.03 (-4.59 – 4.28)<br>p = 0.196        | -1.93 ± 1.83 (4)<br>-1.67 (-4.07 – -0.31)<br>p = 0.125        | 0.301                 |

**Abbreviations: MoSvc: Months of Service; PriorTBI: Prior Traumatic Brain Injury (number); Educa: Education (years); HBOTn: Hyperbaric Oxygen Therapy (total number); HBOTd: Hyperbaric Oxygen Therapy (total calendar days); GreenIR: Green Word Memory Test Immediate Recognition; GreenDR: Green Word Memory Test Delayed Recognition; GreenCNS: Green Word Memory Test Consistency; GreenMC: Green Word Memory Test Multiple Choice; GreenFR: Green Word Memory Test Free Recall; AMI: Auditory Memory Index; VMI: Visual Memory Index; VWMI: Visual Working Memory Index; DMI: Delayed Memory Index; IQ: Intelligence Quotient; DelWMS:**

**Delayed Wechsler Memory Scale; WrkWMS: Working Wechsler Memory Scale; TOVAVar: Test of Variables of Attention Variability; QOL: Quality of Life; PHQ9Dep: Personal Health Questionnaire 9 Depression; GAD7Anx: General Anxiety Disorder 7 Anxiety; CogPBN: Cognitive Percent Back to Normal; PhysPBN: Physical Percent Back to Normal; EmoPBN: Emotional Percent Back to Normal; Inatt: TOVA Inattention; Impls: TOVA Impulsivity; RxTm: TOVA Reaction Time; TapD: Finger Tapping Dominant Hand; TapND: Finger Tapper Non-Dominant Hand; PegD: Grooved PegBoard Dominant Hand; PegND: Grooved PegBoard Non-Dominant Hand; Parag: Rivermead Paragraph Memory Test; RPCSQ: Rivermead Post-Concussion Symptom Questionnaire; PCLM: Post-Traumatic Stress Disorder Checklist Military; LG: Left Hemisphere Gray Matter Region of Interest; LW: Left Hemisphere White Matter Region of Interest; RG: Right Hemisphere Gray Matter Region of Interest; RW: Right Hemisphere White Matter Region of Interest; 30, 60, 90, 120, 150: 30, 60, 90, 120, 150 degrees from 12:00 on a transverse slice of the SPECT brain imaging.; All: All Regions of Interest in the Gray or White Matter of either Hemisphere.**

---
