# Supplementary material for: Case control study: hyperbaric oxygen treatment of mild traumatic brain injury persistent post-concussion syndrome and post-traumatic stress disorder
Source: PubMed Central journal article supplement — Med Gas Res. 2017 Oct 17;7(3):156–74. doi: 10.4103/2045-9912.215745 (PMC5674654; doi:10.4103/2045-9912.215745), 2017-10-17
Supplement: MGR-7-156_Suppl3.pdf [file MGR-7-156_Suppl3.pdf]

## **Additional File 2: Association of Improvements in Sleep and Medication with Changes in NeuroPsych and SPECT Variables**

Three categorical variables were examined:

- change in psych medications (Increased, No Change, or Reduction),
- sleep improvement at end of HBOT (Improved, or No Change),
- sleep improvement at 6 months (Improved, No Change, or Worse).

For each of these categorical variables, a table is produced, summarizing the **changes** in all neuropsych and Spect variables, for subjects at each level of that category, and for all subjects combined.

Data is summarized in the format:

Mean  $\pm$  Standard Deviation (# of Subjects)

Median (Minimum – Maximum)

p value for significance of change within the level

The **values** of variables that were measured at only one time point are also summarized, but the summary does not contain a within-level p value.

The right-most column of the table contains a p-value indicating whether there was a significant between-level difference in the mean changes (or mean values, for variables measured at only one time point).

Within-level p values in all three tables are obtained from the 1-group Student t test.

Between-level p values for **change in psych medications** table are obtained from the 1-way Analysis of Variance, and indicates whether there is any significant differences among the three levels.

Between-level p values for the **sleep improvement at end of HBOT** table are obtained from the unpaired equal-variance Student t test, and indicate whether there is a significant difference between Improved and No Change.

Between-level p values for the **sleep improvement at 6 months** table are also obtained from the unpaired equal-variance Student t test, even though there are three levels (Improved, No Change, or Worse). This is because the Worse level has only 1 subject, so an ANOVA cannot be performed. The p values indicate whether there is a significant difference between Improved and No Change.

Significant p values ( $p \leq 0.05$ ) are flagged in **red**; near-significant p values are flagged in **orange**. No Bonferroni or other adjustments for multiplicity are applied.

The SPECT variable measured was CV.

*Change in NeuroPsych and SPECT variables, by Change in Psych Medication*

| Variable | Increased Meds                            | No Change                                     | Reduction in Meds                                  | All Subjects                                          | p-val        |
|----------|-------------------------------------------|-----------------------------------------------|----------------------------------------------------|-------------------------------------------------------|--------------|
| Age      | 34.8 ± 4.5 (4)<br>33.5 (31 – 41)          | 29.5 ± 9.2 (8)<br>27.5 (22 – 51)              | 30.5 ± 7.7 (11)<br>27 (23 – 45)                    | 30.4 ± 7.5 (29)<br>29 (21 – 51)                       | 0.548        |
| MoSvc    | 99 ± 20 (4)<br>102 (72 – 120)             | 66 ± 97 (8)<br>32 (9 – 300)                   | 51 ± 51 (11)<br>42 (18 – 197)                      | 72 ± 73 (29)<br>42 (9 – 300)                          | 0.493        |
| PriorTBI | 1.25 ± 1.26 (4)<br>1 (0 – 3)              | 1.25 ± 1.04 (8)<br>1 (0 – 3)                  | 0.45 ± 0.69 (11)<br>0 (0 – 2)                      | 1.28 ± 2.14 (29)<br>1 (0 – 10)                        | 0.144        |
| Blasts   | 1.8 ± 1.0 (4)<br>1.5 (1 – 3)              | 9.5 ± 9.8 (8)<br>5.5 (1 – 25)                 | 3.1 ± 3.9 (11)<br>1 (1 – 13)                       | 4.5 ± 6.3 (29)<br>2 (1 – 25)                          | <b>0.075</b> |
| Delay    | 4.06 ± 0.63 (4)<br>4.17 (3.25 – 4.67)     | 3.48 ± 1.13 (8)<br>3.12 (2.25 – 5.83)         | 3.09 ± 1.39 (11)<br>2.92 (1.25 – 5.33)             | 3.35 ± 1.21 (29)<br>3.25 (1.25 – 5.83)                | 0.396        |
| Tobacco  | 0.38 ± 0.75 (4)<br>0 (0 – 1.5)            | 0.25 ± 0.39 (8)<br>0 (0 – 1)                  | 0.10 ± 0.20 (11)<br>0 (0 – 0.5)                    | 0.27 ± 0.50 (29)<br>0 (0 – 2)                         | 0.475        |
| Educ     | 12.50 ± 1.00 (4)<br>12 (12 – 14)          | 13.19 ± 2.95 (8)<br>12 (10 – 19)              | 13.36 ± 1.52 (11)<br>13.5 (11 – 16)                | 13.02 ± 2.01 (29)<br>12 (9 – 19)                      | 0.779        |
| HBOTn    | 39.50 ± 1.00 (4)<br>40 (38 – 40)          | 40.00 ± 0.00 (8)<br>40 (40 – 40)              | 39.64 ± 0.67 (11)<br>40 (38 – 40)                  | 39.72 ± 0.65 (29)<br>40 (38 – 40)                     | 0.328        |
| HBOTd    | 32.0 ± 8.0 (4)<br>28 (28 – 44)            | 30.5 ± 2.0 (8)<br>30 (29 – 35)                | 30.0 ± 2.3 (11)<br>30 (27 – 34)                    | 30.9 ± 4.5 (29)<br>30 (23 – 44)                       | 0.655        |
| GreenIR  | 84.0 ± 17.7 (4)<br>90 (58 – 98)           | 95.5 ± 6.8 (8)<br>98 (80 – 100)               | 84.1 ± 13.3 (11)<br>88 (60 – 100)                  | 89.2 ± 12.1 (29)<br>90 (58 – 100)                     | 0.131        |
| GreenDR  | 85.5 ± 11.9 (4)<br>90.5 (68 – 93)         | 92.6 ± 8.8 (8)<br>94 (75 – 100)               | 83.6 ± 13.8 (11)<br>90 (60 – 100)                  | 88.6 ± 11.6 (29)<br>93 (60 – 100)                     | 0.284        |
| GreenCNS | 84.0 ± 13.7 (4)<br>88 (65 – 95)           | 92.3 ± 9.1 (8)<br>95 (75 – 100)               | 78.8 ± 16.1 (11)<br>83 (55 – 100)                  | 85.6 ± 13.8 (29)<br>88 (55 – 100)                     | 0.134        |
| GreenMC  | 71.3 ± 17.0 (4)<br>75 (50 – 85)           | 87.5 ± 16.7 (8)<br>90 (50 – 100)              | 67.9 ± 17.0 (11)<br>62 (40 – 95)                   | 77.5 ± 18.1 (29)<br>85 (40 – 100)                     | <b>0.060</b> |
| GreenFR  | 36.5 ± 25.1 (4)<br>32.5 (13 – 68)         | 52.0 ± 22.6 (8)<br>42.5 (33 – 100)            | 51.5 ± 20.2 (11)<br>48 (25 – 95)                   | 51.9 ± 21.9 (29)<br>48 (13 – 100)                     | 0.461        |
| AMI      | 4.0 ± 6.2 (4)<br>6 (-5 – 9)<br>p = 0.289  | -3.1 ± 13.0 (7)<br>-2 (-26 – 10)<br>p = 0.545 | 2.9 ± 12.6 (10)<br>-1 (-16 – 22)<br>p = 0.486      | 2.8 ± 11.9 (24)<br>5.5 (-26 – 22)<br>p = 0.264        | 0.521        |
| VMI      | 3.8 ± 5.3 (4)<br>5 (-3 – 8)<br>p = 0.253  | 1.9 ± 20.3 (7)<br>1 (-30 – 30)<br>p = 0.817   | 3.4 ± 9.6 (10)<br>3 (-12 – 21)<br>p = 0.293        | 3.9 ± 13.8 (24)<br>3 (-30 – 30)<br>p = 0.177          | 0.966        |
| VWMI     | 6.3 ± 8.5 (4)<br>7 (-4 – 15)<br>p = 0.236 | 1.3 ± 9.6 (7)<br>4 (-18 – 12)<br>p = 0.736    | 7.4 ± 8.9 (10)<br>11 (-7 – 16)<br><b>p = 0.027</b> | 6.8 ± 10.0 (24)<br>7.5 (-18 – 25)<br><b>p = 0.003</b> | 0.397        |

|                |                                                         |                                                        |                                                         |                                                          |              |
|----------------|---------------------------------------------------------|--------------------------------------------------------|---------------------------------------------------------|----------------------------------------------------------|--------------|
| <b>DMI</b>     | 6.3 ± 6.1 (4)<br>6 (-1 – 14)<br>p = 0.134               | 1.7 ± 15.4 (7)<br>2 (-21 – 26)<br>p = 0.778            | 5.6 ± 12.1 (10)<br>4 (-16 – 21)<br>p = 0.177            | 5.7 ± 12.0 (24)<br>5.5 (-21 – 26)<br><b>p = 0.029</b>    | 0.783        |
| <b>IQ</b>      | 15.0 ± 5.5 (4)<br>15 (9 – 21)<br><b>p = 0.012</b>       | 7.6 ± 10.0 (8)<br>10 (-9 – 21)<br><b>p = 0.067</b>     | 16.6 ± 11.2 (11)<br>16 (3 – 47)<br><b>p &lt; 0.001</b>  | 14.2 ± 10.3 (29)<br>15 (-9 – 47)<br><b>p &lt; 0.001</b>  | 0.172        |
| <b>DelWMS</b>  | 17.8 ± 2.5 (4)<br>17.5 (15 – 21)<br><b>p &lt; 0.001</b> | 13.8 ± 13.1 (8)<br>16 (-6 – 30)<br><b>p = 0.021</b>    | 15.5 ± 15.0 (11)<br>16 (-4 – 38)<br><b>p = 0.006</b>    | 15.2 ± 13.9 (29)<br>17 (-19 – 38)<br><b>p &lt; 0.001</b> | 0.882        |
| <b>WrkWMS</b>  | 11.0 ± 6.9 (4)<br>8.5 (6 – 21)<br><b>p = 0.049</b>      | 9.4 ± 13.4 (8)<br>10 (-15 – 32)<br><b>p = 0.089</b>    | 12.2 ± 9.1 (11)<br>11 (0 – 27)<br><b>p = 0.001</b>      | 11.3 ± 10.5 (29)<br>10 (-15 – 32)<br><b>p &lt; 0.001</b> | 0.850        |
| <b>Stroop</b>  | 11.8 ± 11.6 (4)<br>12.5 (-3 – 25)<br>p = 0.137          | 6.5 ± 13.9 (8)<br>3.5 (-10 – 29)<br>p = 0.227          | 10.5 ± 13.4 (11)<br>2 (-2 – 39)<br><b>p = 0.026</b>     | 10.9 ± 12.2 (29)<br>10 (-10 – 39)<br><b>p &lt; 0.001</b> | 0.750        |
| <b>TOVAVar</b> | 7.5 ± 9.6 (4)<br>5 (0 – 20)<br>p = 0.215                | -2.6 ± 37.5 (8)<br>-1.5 (-70 – 45)<br>p = 0.849        | 13.3 ± 23.2 (11)<br>1 (-30 – 48)<br><b>p = 0.086</b>    | 8.6 ± 25.3 (29)<br>8 (-70 – 48)<br><b>p = 0.078</b>      | 0.482        |
| <b>QOL</b>     | 29 ± 39 (4)<br>18 (-3 – 82)<br>p = 0.238                | 19 ± 17 (8)<br>23 (-12 – 40)<br><b>p = 0.018</b>       | 34 ± 39 (11)<br>27 (-37 – 78)<br><b>p = 0.016</b>       | 28 ± 32 (29)<br>24 (-37 – 96)<br><b>p &lt; 0.001</b>     | 0.618        |
| <b>PHQ9Dep</b> | -7.5 ± 7.9 (4)<br>-5 (-19 – -1)<br>p = 0.155            | -5.5 ± 2.7 (8)<br>-5 (-9 – -2)<br><b>p &lt; 0.001</b>  | -10.4 ± 8.5 (11)<br>-14 (-21 – 5)<br><b>p = 0.002</b>   | -7.9 ± 6.8 (29)<br>-7 (-21 – 5)<br><b>p &lt; 0.001</b>   | 0.335        |
| <b>GAD7Anx</b> | -4.5 ± 4.4 (4)<br>-4 (-10 – 0)<br>p = 0.135             | -4.8 ± 5.0 (8)<br>-3.5 (-13 – 1)<br><b>p = 0.031</b>   | -7.6 ± 7.8 (11)<br>-12 (-14 – 4)<br><b>p = 0.009</b>    | -5.4 ± 5.9 (29)<br>-5 (-14 – 4)<br><b>p &lt; 0.001</b>   | 0.556        |
| <b>CogPBN</b>  | 12.5 ± 15.5 (4)<br>12.5 (-5 – 30)<br>p = 0.206          | 15.0 ± 20.7 (8)<br>12.5 (-10 – 50)<br><b>p = 0.080</b> | 23.0 ± 15.6 (11)<br>15 (5 – 50)<br><b>p &lt; 0.001</b>  | 20.4 ± 17.4 (29)<br>15 (-10 – 50)<br><b>p &lt; 0.001</b> | 0.483        |
| <b>PhysPBN</b> | 16.3 ± 18.0 (4)<br>22.5 (-10 – 30)<br>p = 0.168         | 18.8 ± 15.3 (8)<br>20 (0 – 50)<br><b>p = 0.010</b>     | 22.7 ± 16.9 (11)<br>20 (0 – 55)<br><b>p = 0.001</b>     | 20.7 ± 16.2 (29)<br>20 (-10 – 55)<br><b>p &lt; 0.001</b> | 0.763        |
| <b>EmoPBN</b>  | 26.3 ± 14.9 (4)<br>25 (10 – 45)<br><b>p = 0.039</b>     | 21.6 ± 8.4 (8)<br>25 (8 – 30)<br><b>p &lt; 0.001</b>   | 37.1 ± 16.7 (11)<br>30 (10 – 60)<br><b>p &lt; 0.001</b> | 31.1 ± 18.9 (29)<br>30 (5 – 80)<br><b>p &lt; 0.001</b>   | <b>0.075</b> |
| <b>Inatt</b>   | 15.3 ± 30.5 (4)<br>0 (0 – 61)<br>p = 0.391              | 0.9 ± 42.9 (8)<br>0 (-62 – 60)<br>p = 0.956            | 10.2 ± 13.5 (11)<br>8 (-7 – 39)<br><b>p = 0.031</b>     | 8.0 ± 27.8 (29)<br>0 (-62 – 61)<br>p = 0.134             | 0.687        |
| <b>Impls</b>   | 21.5 ± 32.1 (4)<br>22 (-18 – 60)<br>p = 0.273           | 15.5 ± 22.1 (8)<br>14.5 (-25 – 54)<br><b>p = 0.088</b> | 5.5 ± 14.2 (11)<br>4 (-14 – 30)<br>p = 0.233            | 11.9 ± 20.2 (29)<br>8 (-25 – 60)<br><b>p = 0.004</b>     | 0.357        |
| <b>RxTm</b>    | 2.3 ± 12.9 (4)<br>4.5 (-14 – 14)<br>p = 0.750           | -8.0 ± 16.5 (8)<br>-4 (-32 – 17)<br>p = 0.213          | 3.6 ± 17.4 (11)<br>8 (-20 – 29)<br>p = 0.505            | 3.5 ± 18.2 (29)<br>5 (-32 – 43)<br>p = 0.312             | 0.314        |

|       |                                                               |                                                        |                                                               |                                                               |              |
|-------|---------------------------------------------------------------|--------------------------------------------------------|---------------------------------------------------------------|---------------------------------------------------------------|--------------|
| TapD  | 4.8 ± 6.2 (4)<br>3 (0 – 13)<br>p = 0.222                      | 4.8 ± 7.5 (8)<br>6 (-11 – 13)<br>p = 0.115             | 5.3 ± 12.5 (11)<br>5 (-19 – 24)<br>p = 0.193                  | 6.4 ± 16.0 (29)<br>5 (-20 – 68)<br><b>p = 0.040</b>           | 0.992        |
| TapND | 3.3 ± 10.5 (4)<br>6.5 (-12 – 12)<br>p = 0.580                 | -0.1 ± 11.3 (8)<br>2 (-18 – 18)<br>p = 0.976           | 5.0 ± 10.5 (11)<br>1 (-7 – 30)<br>p = 0.147                   | 4.5 ± 14.7 (29)<br>1 (-18 – 57)<br>p = 0.111                  | 0.600        |
| PegD  | 13.3 ± 11.0 (4)<br>14 (0 – 25)<br><b>p = 0.096</b>            | 3.4 ± 14.5 (8)<br>1 (-14 – 33)<br>p = 0.532            | 14.1 ± 13.9 (11)<br>13 (-10 – 33)<br><b>p = 0.007</b>         | 11.2 ± 13.9 (29)<br>9 (-14 – 33)<br><b>p &lt; 0.001</b>       | 0.242        |
| PegND | 2.3 ± 3.3 (4)<br>1 (0 – 7)<br>p = 0.266                       | -4.5 ± 14.1 (8)<br>-3 (-30 – 13)<br>p = 0.396          | 11.0 ± 13.9 (11)<br>6 (-7 – 36)<br><b>p = 0.025</b>           | 4.2 ± 13.6 (29)<br>3 (-30 – 36)<br>p = 0.105                  | <b>0.054</b> |
| Parag | -2.3 ± 8.5 (4)<br>-0.5 (-14 – 6)<br>p = 0.633                 | -1.3 ± 2.8 (8)<br>-0.5 (-5 – 2)<br>p = 0.242           | -1.0 ± 5.1 (11)<br>-2 (-11 – 8)<br>p = 0.532                  | -0.9 ± 4.6 (29)<br>-1 (-14 – 8)<br>p = 0.324                  | 0.917        |
| RPCSQ | -12.3 ± 6.5 (4)<br>-14 (-18 – -3)<br><b>p = 0.033</b>         | -10.6 ± 6.5 (8)<br>-10.5 (-20 – 1)<br><b>p = 0.003</b> | -14.5 ± 13.4 (11)<br>-14 (-38 – 12)<br><b>p = 0.005</b>       | -13.5 ± 10.4 (29)<br>-13 (-38 – 12)<br><b>p &lt; 0.001</b>    | 0.736        |
| PCLM  | -15.0 ± 12.0 (4)<br>-14.5 (-30 – -1)<br><b>p = 0.088</b>      | -9.8 ± 9.5 (8)<br>-9 (-27 – 2)<br><b>p = 0.023</b>     | -19.7 ± 20.9 (11)<br>-23 (-54 – 10)<br><b>p = 0.011</b>       | -16.6 ± 16.2 (29)<br>-16 (-54 – 10)<br><b>p &lt; 0.001</b>    | 0.442        |
| LG030 | 0.00 ± 2.17 (4)<br>0.46 (-3.03 – 2.11)<br>p = 0.997           | -0.14 ± 2.02 (8)<br>0.22 (-3.96 – 2.5)<br>p = 0.856    | -0.55 ± 1.11 (11)<br>-0.68 (-2 – 1.86)<br>p = 0.135           | -0.39 ± 1.59 (29)<br>-0.14 (-3.96 – 2.5)<br>p = 0.198         | 0.799        |
| LG060 | -0.98 ± 1.11 (4)<br>-1.36 (-1.85 – 0.64)<br>p = 0.175         | 0.10 ± 1.48 (8)<br>0.36 (-2.29 – 2.27)<br>p = 0.856    | -1.10 ± 1.11 (11)<br>-1.19 (-2.7 – 0.44)<br><b>p = 0.008</b>  | -0.69 ± 1.23 (29)<br>-0.86 (-2.7 – 2.27)<br><b>p = 0.005</b>  | 0.127        |
| LG090 | -0.26 ± 0.39 (4)<br>-0.38 (-0.57 – 0.31)<br>p = 0.276         | 0.51 ± 2.65 (8)<br>0.96 (-3.71 – 3.66)<br>p = 0.603    | -0.41 ± 1.39 (11)<br>0 (-2.74 – 1.38)<br>p = 0.355            | -0.09 ± 1.75 (29)<br>0 (-3.71 – 3.66)<br>p = 0.779            | 0.563        |
| LG120 | -1.63 ± 0.63 (4)<br>-1.58 (-2.43 – -0.91)<br><b>p = 0.014</b> | 0.84 ± 1.51 (8)<br>0.7 (-0.99 – 3.46)<br>p = 0.157     | -0.77 ± 2.38 (11)<br>-1.43 (-3.33 – 2.7)<br>p = 0.311         | -0.27 ± 2.12 (29)<br>-0.8 (-3.33 – 4.54)<br>p = 0.491         | <b>0.093</b> |
| LG150 | -2.12 ± 2.30 (4)<br>-2.68 (-3.96 – 0.84)<br>p = 0.162         | 0.03 ± 2.16 (8)<br>0.32 (-3.34 – 3.08)<br>p = 0.969    | 0.02 ± 1.73 (11)<br>0.47 (-2.85 – 2.1)<br>p = 0.964           | -0.47 ± 2.21 (29)<br>0.19 (-4.6 – 3.55)<br>p = 0.265          | 0.169        |
| LGAll | -1.00 ± 0.89 (4)<br>-0.74 (-2.27 – -0.24)<br>p = 0.111        | 0.27 ± 0.93 (8)<br>0.31 (-1.04 – 1.66)<br>p = 0.440    | -0.56 ± 0.86 (11)<br>-0.61 (-1.77 – 0.73)<br><b>p = 0.057</b> | -0.38 ± 0.95 (29)<br>-0.57 (-2.27 – 1.66)<br><b>p = 0.039</b> | <b>0.058</b> |

|       |                                                       |                                                              |                                                               |                                                               |       |
|-------|-------------------------------------------------------|--------------------------------------------------------------|---------------------------------------------------------------|---------------------------------------------------------------|-------|
| LW060 | 0.08 ± 1.44 (4)<br>0.37 (-1.89 – 1.48)<br>p = 0.916   | -1.87 ± 3.39 (8)<br>-1 (-7.97 – 2.99)<br>p = 0.163           | -0.22 ± 2.79 (11)<br>-0.7 (-4.22 – 4.85)<br>p = 0.800         | -0.54 ± 2.75 (29)<br>-0.7 (-7.97 – 4.85)<br>p = 0.303         | 0.399 |
| LW120 | -1.68 ± 2.25 (4)<br>-1.28 (-4.45 – 0.31)<br>p = 0.233 | -1.66 ± 1.53 (8)<br>-2.12 (-3.09 – 1.67)<br><b>p = 0.018</b> | -0.89 ± 3.22 (11)<br>-0.43 (-6.12 – 3.81)<br>p = 0.383        | -1.06 ± 2.74 (29)<br>-0.87 (-6.12 – 4.88)<br><b>p = 0.046</b> | 0.775 |
| LWAll | -0.80 ± 0.80 (4)<br>-0.66 (-1.88 – 0.02)<br>p = 0.140 | -1.76 ± 2.03 (8)<br>-1.59 (-5.26 – 0.82)<br><b>p = 0.044</b> | -0.55 ± 2.61 (11)<br>-0.01 (-4.62 – 3.11)<br>p = 0.498        | -0.80 ± 2.23 (29)<br>-0.79 (-5.26 – 3.11)<br><b>p = 0.064</b> | 0.503 |
| RG030 | -0.38 ± 2.41 (4)<br>0.3 (-3.84 – 1.74)<br>p = 0.775   | 0.12 ± 1.16 (8)<br>0.1 (-1.6 – 1.81)<br>p = 0.770            | -0.75 ± 1.64 (11)<br>-1.28 (-2.32 – 3.19)<br>p = 0.160        | -0.28 ± 1.52 (29)<br>-0.57 (-3.84 – 3.19)<br>p = 0.333        | 0.528 |
| RG060 | 0.59 ± 2.54 (4)<br>0.66 (-2.37 – 3.38)<br>p = 0.675   | 0.06 ± 0.79 (8)<br>-0.08 (-1.27 – 1.4)<br>p = 0.827          | -0.79 ± 1.01 (11)<br>-1.05 (-1.97 – 1.49)<br><b>p = 0.026</b> | -0.40 ± 1.33 (29)<br>-0.51 (-2.7 – 3.38)<br>p = 0.114         | 0.159 |
| RG090 | 1.00 ± 1.64 (4)<br>0.49 (-0.32 – 3.35)<br>p = 0.308   | 0.10 ± 1.14 (8)<br>-0.23 (-0.86 – 2.37)<br>p = 0.807         | -0.38 ± 1.40 (11)<br>0.02 (-3.53 – 1.24)<br>p = 0.386         | 0.08 ± 1.32 (29)<br>0.04 (-3.53 – 3.35)<br>p = 0.736          | 0.236 |
| RG120 | 0.02 ± 0.61 (4)<br>0.1 (-0.75 – 0.61)<br>p = 0.960    | 0.28 ± 1.72 (8)<br>-0.13 (-2.29 – 2.58)<br>p = 0.662         | 0.09 ± 2.11 (11)<br>0.05 (-4.63 – 2.75)<br>p = 0.890          | -0.06 ± 1.80 (29)<br>0.05 (-4.63 – 2.75)<br>p = 0.851         | 0.964 |
| RG150 | -0.18 ± 1.76 (4)<br>-0.29 (-1.96 – 1.82)<br>p = 0.852 | -0.71 ± 1.64 (8)<br>-0.45 (-2.84 – 1.97)<br>p = 0.260        | -0.10 ± 1.37 (11)<br>-0.64 (-2.24 – 1.61)<br>p = 0.820        | -0.32 ± 1.35 (29)<br>-0.46 (-2.84 – 1.97)<br>p = 0.217        | 0.679 |
| RGAll | 0.21 ± 0.70 (4)<br>0.25 (-0.58 – 0.91)<br>p = 0.588   | -0.03 ± 0.59 (8)<br>0.26 (-1.25 – 0.41)<br>p = 0.896         | -0.39 ± 0.55 (11)<br>-0.42 (-0.97 – 0.62)<br><b>p = 0.041</b> | -0.20 ± 0.59 (29)<br>-0.3 (-1.25 – 0.91)<br><b>p = 0.087</b>  | 0.190 |
| RW060 | 0.09 ± 1.93 (4)<br>-0.06 (-2.02 – 2.5)<br>p = 0.932   | -1.61 ± 2.83 (8)<br>-1.01 (-6.92 – 3.01)<br>p = 0.151        | -1.46 ± 3.79 (11)<br>-1.71 (-6.58 – 5.58)<br>p = 0.229        | -1.19 ± 2.92 (29)<br>-1.25 (-6.92 – 5.58)<br><b>p = 0.037</b> | 0.666 |
| RW120 | 0.99 ± 4.10 (4)<br>1.63 (-4.34 – 5.06)<br>p = 0.661   | -0.07 ± 3.23 (8)<br>0.22 (-3.97 – 5.55)<br>p = 0.950         | -0.83 ± 2.38 (11)<br>0.76 (-4.6 – 1.33)<br>p = 0.274          | -0.42 ± 2.73 (29)<br>0.1 (-4.6 – 5.55)<br>p = 0.413           | 0.578 |
| RWAll | 0.54 ± 2.99 (4)<br>0.78 (-3.18 – 3.78)<br>p = 0.741   | -0.84 ± 2.69 (8)<br>-0.95 (-4.59 – 4.28)<br>p = 0.404        | -1.15 ± 2.24 (11)<br>-1.12 (-4.07 – 3.4)<br>p = 0.120         | -0.80 ± 2.30 (29)<br>-1.03 (-4.59 – 4.28)<br><b>p = 0.070</b> | 0.526 |

*Change in NeuroPsych and SPECT var's, by Post-HBOT Sleep Improvement*

| Variable | Improved Sleep                                       | No Change                                    | Total                                                 | P-val        |
|----------|------------------------------------------------------|----------------------------------------------|-------------------------------------------------------|--------------|
| Age      | 32.9 ± 8.7 (16)<br>31.5 (23 – 51)                    | 26.5 ± 3.4 (6)<br>26 (22 – 31)               | 30.4 ± 7.5 (29)<br>29 (21 – 51)                       | <b>0.099</b> |
| MoSvc    | 90 ± 89 (16)<br>51 (18 – 300)                        | 40 ± 41 (6)<br>28 (9 – 120)                  | 72 ± 73 (29)<br>42 (9 – 300)                          | 0.202        |
| PriorTBI | 0.94 ± 1.53 (16)<br>0.5 (0 – 6)                      | 1.17 ± 1.17 (6)<br>1 (0 – 3)                 | 1.28 ± 2.14 (29)<br>1 (0 – 10)                        | 0.744        |
| Blasts   | 3.2 ± 5.6 (16)<br>1 (1 – 23)                         | 8.2 ± 9.5 (6)<br>4.5 (1 – 25)                | 4.5 ± 6.3 (29)<br>2 (1 – 25)                          | 0.139        |
| Delay    | 3.25 ± 1.51 (16)<br>3.08 (1.25 – 5.83)               | 3.21 ± 0.70 (6)<br>3.08 (2.25 – 4.17)        | 3.35 ± 1.21 (29)<br>3.25 (1.25 – 5.83)                | 0.949        |
| Tobacco  | 0.21 ± 0.41 (16)<br>0 (0 – 1.5)                      | 0.17 ± 0.28 (6)<br>0 (0 – 0.67)              | 0.27 ± 0.50 (29)<br>0 (0 – 2)                         | 0.825        |
| Educ     | 13.50 ± 2.01 (16)<br>13.25 (11 – 19)                 | 11.75 ± 1.17 (6)<br>12 (10 – 13.5)           | 13.02 ± 2.01 (29)<br>12 (9 – 19)                      | <b>0.060</b> |
| HBOTn    | 39.81 ± 0.54 (16)<br>40 (38 – 40)                    | 39.67 ± 0.82 (6)<br>40 (38 – 40)             | 39.72 ± 0.65 (29)<br>40 (38 – 40)                     | 0.630        |
| HBOTd    | 30.1 ± 4.3 (16)<br>29.5 (23 – 44)                    | 30.0 ± 2.7 (6)<br>29 (28 – 35)               | 30.9 ± 4.5 (29)<br>30 (23 – 44)                       | 0.948        |
| GreenIR  | 86.8 ± 12.2 (16)<br>89 (60 – 100)                    | 91.5 ± 7.3 (6)<br>91.5 (80 – 100)            | 89.2 ± 12.1 (29)<br>90 (58 – 100)                     | 0.384        |
| GreenDR  | 87.6 ± 13.2 (16)<br>93 (60 – 100)                    | 87.3 ± 8.6 (6)<br>86.5 (75 – 100)            | 88.6 ± 11.6 (29)<br>93 (60 – 100)                     | 0.961        |
| GreenCNS | 82.4 ± 15.3 (16)<br>85 (55 – 100)                    | 87.7 ± 9.8 (6)<br>88 (75 – 100)              | 85.6 ± 13.8 (29)<br>88 (55 – 100)                     | 0.443        |
| GreenMC  | 74.8 ± 18.1 (16)<br>72.5 (40 – 100)                  | 77.5 ± 18.9 (6)<br>82.5 (50 – 100)           | 77.5 ± 18.1 (29)<br>85 (40 – 100)                     | 0.762        |
| GreenFR  | 57.1 ± 20.8 (16)<br>58 (25 – 100)                    | 44.3 ± 9.8 (6)<br>45 (33 – 60)               | 51.9 ± 21.9 (29)<br>48 (13 – 100)                     | 0.169        |
| AMI      | 4.9 ± 12.1 (13)<br>6 (-16 – 22)<br>p = 0.169         | -3.8 ± 14.7 (5)<br>-1 (-26 – 9)<br>p = 0.595 | 2.8 ± 11.9 (24)<br>5.5 (-26 – 22)<br>p = 0.264        | 0.214        |
| VMI      | 5.1 ± 15.9 (13)<br>4 (-30 – 30)<br>p = 0.272         | -3.8 ± 4.6 (5)<br>-3 (-11 – 1)<br>p = 0.139  | 3.9 ± 13.8 (24)<br>3 (-30 – 30)<br>p = 0.177          | 0.245        |
| VWMI     | 8.6 ± 12.5 (13)<br>12 (-18 – 25)<br><b>p = 0.029</b> | 2.8 ± 3.6 (5)<br>3 (-3 – 7)<br>p = 0.160     | 6.8 ± 10.0 (24)<br>7.5 (-18 – 25)<br><b>p = 0.003</b> | 0.330        |

|                |                                                           |                                                       |                                                          |       |
|----------------|-----------------------------------------------------------|-------------------------------------------------------|----------------------------------------------------------|-------|
| <b>DMI</b>     | 7.5 ± 13.5 (13)<br>13 (-16 – 26)<br><b>p = 0.069</b>      | -1.8 ± 10.9 (5)<br>2 (-21 – 6)<br>p = 0.730           | 5.7 ± 12.0 (24)<br>5.5 (-21 – 26)<br><b>p = 0.029</b>    | 0.191 |
| <b>IQ</b>      | 14.5 ± 13.0 (16)<br>15.5 (-9 – 47)<br><b>p &lt; 0.001</b> | 12.2 ± 6.4 (6)<br>13 (2 – 21)<br><b>p = 0.005</b>     | 14.2 ± 10.3 (29)<br>15 (-9 – 47)<br><b>p &lt; 0.001</b>  | 0.681 |
| <b>DeIWMS</b>  | 16.3 ± 14.0 (16)<br>20.5 (-4 – 36)<br><b>p &lt; 0.001</b> | 11.2 ± 8.7 (6)<br>14 (-6 – 18)<br><b>p = 0.025</b>    | 15.2 ± 13.9 (29)<br>17 (-19 – 38)<br><b>p &lt; 0.001</b> | 0.420 |
| <b>WrkWMS</b>  | 10.8 ± 12.3 (16)<br>10 (-15 – 29)<br><b>p = 0.003</b>     | 12.2 ± 11.3 (6)<br>9 (0 – 32)<br><b>p = 0.046</b>     | 11.3 ± 10.5 (29)<br>10 (-15 – 32)<br><b>p &lt; 0.001</b> | 0.817 |
| <b>Stroop</b>  | 11.1 ± 14.2 (16)<br>12 (-10 – 39)<br><b>p = 0.007</b>     | 10.7 ± 12.8 (6)<br>8.5 (-3 – 29)<br><b>p = 0.096</b>  | 10.9 ± 12.2 (29)<br>10 (-10 – 39)<br><b>p &lt; 0.001</b> | 0.953 |
| <b>TOVAVar</b> | 12.4 ± 20.7 (16)<br>5.5 (-30 – 48)<br><b>p = 0.030</b>    | 2.3 ± 40.1 (6)<br>6 (-70 – 45)<br>p = 0.892           | 8.6 ± 25.3 (29)<br>8 (-70 – 48)<br><b>p = 0.078</b>      | 0.445 |
| <b>QOL</b>     | 34 ± 36 (16)<br>26 (-37 – 96)<br><b>p = 0.002</b>         | 18 ± 20 (6)<br>20 (-12 – 40)<br><b>p = 0.077</b>      | 28 ± 32 (29)<br>24 (-37 – 96)<br><b>p &lt; 0.001</b>     | 0.318 |
| <b>PHQ9Dep</b> | -9.7 ± 7.0 (16)<br>-11.5 (-21 – 5)<br><b>p &lt; 0.001</b> | -8.2 ± 6.1 (6)<br>-8 (-19 – -2)<br><b>p = 0.022</b>   | -7.9 ± 6.8 (29)<br>-7 (-21 – 5)<br><b>p &lt; 0.001</b>   | 0.645 |
| <b>GAD7Anx</b> | -6.9 ± 6.2 (16)<br>-7 (-14 – 2)<br><b>p &lt; 0.001</b>    | -3.5 ± 5.2 (6)<br>-3.5 (-10 – 3)<br>p = 0.163         | -5.4 ± 5.9 (29)<br>-5 (-14 – 4)<br><b>p &lt; 0.001</b>   | 0.245 |
| <b>CogPBN</b>  | 23.9 ± 14.9 (16)<br>22.5 (5 – 50)<br><b>p &lt; 0.001</b>  | 12.5 ± 19.7 (6)<br>7.5 (-5 – 50)<br>p = 0.181         | 20.4 ± 17.4 (29)<br>15 (-10 – 50)<br><b>p &lt; 0.001</b> | 0.156 |
| <b>PhysPBN</b> | 20.3 ± 18.6 (16)<br>20 (-10 – 55)<br><b>p &lt; 0.001</b>  | 24.2 ± 13.6 (6)<br>20 (10 – 50)<br><b>p = 0.007</b>   | 20.7 ± 16.2 (29)<br>20 (-10 – 55)<br><b>p &lt; 0.001</b> | 0.650 |
| <b>EmoPBN</b>  | 29.8 ± 18.4 (16)<br>30 (5 – 60)<br><b>p &lt; 0.001</b>    | 29.2 ± 13.9 (6)<br>27.5 (10 – 45)<br><b>p = 0.004</b> | 31.1 ± 18.9 (29)<br>30 (5 – 80)<br><b>p &lt; 0.001</b>   | 0.945 |
| <b>Inatt</b>   | 14.7 ± 22.2 (16)<br>10.5 (-15 – 61)<br><b>p = 0.018</b>   | 1.2 ± 35.0 (6)<br>0 (-48 – 60)<br>p = 0.938           | 8.0 ± 27.8 (29)<br>0 (-62 – 61)<br>p = 0.134             | 0.290 |
| <b>Impls</b>   | 8.3 ± 22.6 (16)<br>2.5 (-25 – 60)<br>p = 0.162            | 21.8 ± 17.3 (6)<br>17 (8 – 54)<br><b>p = 0.027</b>    | 11.9 ± 20.2 (29)<br>8 (-25 – 60)<br><b>p = 0.004</b>     | 0.202 |
| <b>RxTm</b>    | 5.8 ± 15.8 (16)<br>8 (-20 – 35)<br>p = 0.161              | -3.7 ± 21.5 (6)<br>-3.5 (-32 – 23)<br>p = 0.694       | 3.5 ± 18.2 (29)<br>5 (-32 – 43)<br>p = 0.312             | 0.268 |

|            |                                                               |                                                            |                                                               |              |
|------------|---------------------------------------------------------------|------------------------------------------------------------|---------------------------------------------------------------|--------------|
| TapD       | 9.3 ± 20.5 (16)<br>6 (-20 – 68)<br><b>p = 0.090</b>           | 8.2 ± 3.2 (6)<br>7 (5 – 13)<br><b>p = 0.002</b>            | 6.4 ± 16.0 (29)<br>5 (-20 – 68)<br><b>p = 0.040</b>           | 0.895        |
| TapND      | 9.6 ± 15.9 (16)<br>4.5 (-5 – 57)<br><b>p = 0.029</b>          | 1.0 ± 12.2 (6)<br>3 (-18 – 18)<br>p = 0.849                | 4.5 ± 14.7 (29)<br>1 (-18 – 57)<br>p = 0.111                  | 0.249        |
| PegD       | 13.3 ± 13.8 (16)<br>11.5 (-7 – 33)<br><b>p = 0.002</b>        | 5.8 ± 17.8 (6)<br>3.5 (-14 – 33)<br>p = 0.459              | 11.2 ± 13.9 (29)<br>9 (-14 – 33)<br><b>p &lt; 0.001</b>       | 0.311        |
| PegND      | 4.8 ± 11.6 (16)<br>2.5 (-7 – 36)<br>p = 0.124                 | -3.5 ± 18.7 (6)<br>-3 (-30 – 20)<br>p = 0.666              | 4.2 ± 13.6 (29)<br>3 (-30 – 36)<br>p = 0.105                  | 0.225        |
| Parag      | 0.2 ± 4.7 (16)<br>0 (-11 – 8)<br>p = 0.876                    | -4.5 ± 5.1 (6)<br>-4 (-14 – 0)<br><b>p = 0.084</b>         | -0.9 ± 4.6 (29)<br>-1 (-14 – 8)<br>p = 0.324                  | <b>0.056</b> |
| RPCSQ      | -15.1 ± 12.9 (16)<br>-15 (-38 – 12)<br><b>p &lt; 0.001</b>    | -11.2 ± 3.7 (6)<br>-11.5 (-15 – -6)<br><b>p &lt; 0.001</b> | -13.5 ± 10.4 (29)<br>-13 (-38 – 12)<br><b>p &lt; 0.001</b>    | 0.474        |
| PCLM       | -18.0 ± 18.3 (16)<br>-21 (-54 – 10)<br><b>p = 0.001</b>       | -12.2 ± 4.4 (6)<br>-12.5 (-17 – -7)<br><b>p = 0.001</b>    | -16.6 ± 16.2 (29)<br>-16 (-54 – 10)<br><b>p &lt; 0.001</b>    | 0.456        |
| LG030 (CV) | -0.46 ± 1.38 (16)<br>-0.53 (-3.79 – 1.86)<br>p = 0.198        | -0.05 ± 2.46 (6)<br>0.4 (-3.96 – 2.5)<br>p = 0.961         | -0.39 ± 1.59 (29)<br>-0.14 (-3.96 – 2.5)<br>p = 0.198         | 0.620        |
| LG060      | -0.67 ± 1.31 (16)<br>-0.71 (-2.7 – 2.27)<br><b>p = 0.057</b>  | -0.33 ± 1.12 (6)<br>-0.66 (-1.4 – 1.14)<br>p = 0.503       | -0.69 ± 1.23 (29)<br>-0.86 (-2.7 – 2.27)<br><b>p = 0.005</b>  | 0.579        |
| LG090      | -0.46 ± 1.54 (16)<br>-0.13 (-3.71 – 1.78)<br>p = 0.249        | 0.34 ± 2.44 (6)<br>0.8 (-2.74 – 2.98)<br>p = 0.745         | -0.09 ± 1.75 (29)<br>0 (-3.71 – 3.66)<br>p = 0.779            | 0.364        |
| LG120      | -0.52 ± 1.94 (16)<br>-0.65 (-3.07 – 2.7)<br>p = 0.304         | 0.17 ± 1.97 (6)<br>-0.1 (-2.22 – 3.46)<br>p = 0.839        | -0.27 ± 2.12 (29)<br>-0.8 (-3.33 – 4.54)<br>p = 0.491         | 0.469        |
| LG150      | -0.35 ± 2.33 (16)<br>0.45 (-4.6 – 3.55)<br>p = 0.557          | -0.18 ± 2.33 (6)<br>-0.48 (-3.34 – 3.08)<br>p = 0.854      | -0.47 ± 2.21 (29)<br>0.19 (-4.6 – 3.55)<br>p = 0.265          | 0.884        |
| LGAI       | -0.49 ± 0.76 (16)<br>-0.61 (-1.93 – 0.73)<br><b>p = 0.020</b> | -0.01 ± 1.12 (6)<br>0.1 (-1.56 – 1.66)<br>p = 0.983        | -0.38 ± 0.95 (29)<br>-0.57 (-2.27 – 1.66)<br><b>p = 0.039</b> | 0.257        |
| LW060      | 0.40 ± 2.24 (16)<br>0.37 (-3.52 – 4.85)<br>p = 0.490          | -2.26 ± 3.27 (6)<br>-1 (-7.97 – 0.69)<br>p = 0.151         | -0.54 ± 2.75 (29)<br>-0.7 (-7.97 – 4.85)<br>p = 0.303         | <b>0.041</b> |
| LW120      | -0.98 ± 2.96 (16)<br>-1.21 (-6.12 – 4.88)<br>p = 0.204        | -1.50 ± 2.29 (6)<br>-2.14 (-4.45 – 1.67)<br>p = 0.170      | -1.06 ± 2.74 (29)<br>-0.87 (-6.12 – 4.88)<br><b>p = 0.046</b> | 0.706        |



|              |                                                              |                                                               |                                                               |              |
|--------------|--------------------------------------------------------------|---------------------------------------------------------------|---------------------------------------------------------------|--------------|
| <b>LWAI1</b> | -0.29 ± 2.22 (16)<br>0.11 (-4.62 – 3.11)<br>p = 0.605        | -1.88 ± 1.95 (6)<br>-1.73 (-5.26 – 0.82)<br><b>p = 0.064</b>  | -0.80 ± 2.23 (29)<br>-0.79 (-5.26 – 3.11)<br><b>p = 0.064</b> | 0.141        |
| <b>RG030</b> | -0.39 ± 1.48 (16)<br>-0.84 (-2.32 – 3.19)<br>p = 0.302       | 0.23 ± 1.36 (6)<br>0.1 (-1.6 – 1.81)<br>p = 0.697             | -0.28 ± 1.52 (29)<br>-0.57 (-3.84 – 3.19)<br>p = 0.333        | 0.380        |
| <b>RG060</b> | -0.66 ± 1.14 (16)<br>-0.59 (-2.7 – 1.84)<br><b>p = 0.036</b> | 0.43 ± 1.74 (6)<br>-0.11 (-1.62 – 3.38)<br>p = 0.573          | -0.40 ± 1.33 (29)<br>-0.51 (-2.7 – 3.38)<br>p = 0.114         | 0.101        |
| <b>RG090</b> | -0.43 ± 1.15 (16)<br>-0.14 (-3.53 – 1.24)<br>p = 0.158       | 0.64 ± 1.09 (6)<br>0.47 (-0.37 – 2.37)<br>p = 0.212           | 0.08 ± 1.32 (29)<br>0.04 (-3.53 – 3.35)<br>p = 0.736          | <b>0.064</b> |
| <b>RG120</b> | -0.28 ± 1.72 (16)<br>-0.17 (-4.63 – 2.75)<br>p = 0.521       | 0.88 ± 1.49 (6)<br>0.89 (-1.13 – 2.58)<br>p = 0.209           | -0.06 ± 1.80 (29)<br>0.05 (-4.63 – 2.75)<br>p = 0.851         | 0.161        |
| <b>RG150</b> | 0.19 ± 1.11 (16)<br>0.13 (-1.76 – 1.82)<br>p = 0.504         | -1.57 ± 1.04 (6)<br>-1.77 (-2.84 – -0.37)<br><b>p = 0.014</b> | -0.32 ± 1.35 (29)<br>-0.46 (-2.84 – 1.97)<br>p = 0.217        | <b>0.003</b> |
| <b>RGAI1</b> | -0.31 ± 0.58 (16)<br>-0.43 (-1 – 0.91)<br><b>p = 0.047</b>   | 0.12 ± 0.59 (6)<br>0.38 (-0.95 – 0.66)<br>p = 0.641           | -0.20 ± 0.59 (29)<br>-0.3 (-1.25 – 0.91)<br><b>p = 0.087</b>  | 0.136        |
| <b>RW060</b> | -1.72 ± 3.05 (16)<br>-1.9 (-6.58 – 5.58)<br><b>p = 0.039</b> | -0.29 ± 3.85 (6)<br>0.92 (-6.92 – 3.01)<br>p = 0.862          | -1.19 ± 2.92 (29)<br>-1.25 (-6.92 – 5.58)<br><b>p = 0.037</b> | 0.370        |
| <b>RW120</b> | -0.22 ± 2.07 (16)<br>0.76 (-4.25 – 3.15)<br>p = 0.683        | -0.67 ± 4.70 (6)<br>-3.04 (-4.6 – 5.55)<br>p = 0.740          | -0.42 ± 2.73 (29)<br>0.1 (-4.6 – 5.55)<br>p = 0.413           | 0.750        |
| <b>RWAI1</b> | -0.97 ± 2.03 (16)<br>-1.25 (-4.07 – 3.4)<br><b>p = 0.076</b> | -0.48 ± 3.68 (6)<br>-1.68 (-4.59 – 4.28)<br>p = 0.762         | -0.80 ± 2.30 (29)<br>-1.03 (-4.59 – 4.28)<br><b>p = 0.070</b> | 0.692        |

*Change in NeuroPsych and SPECT var's, by 6-month Sleep Improvement*

| Variable | Improved Sleep                                       | No Change                                | Worse Sleep                           | Total                                                 | P-val        |
|----------|------------------------------------------------------|------------------------------------------|---------------------------------------|-------------------------------------------------------|--------------|
| Age      | 31.6 ± 8.2 (18)<br>29.5 (22 – 51)                    | 25.3 ± 1.2 (3)<br>26 (24 – 26)           | 41.0 ± 0.0 (1)<br>41 (41 – 41)        | 30.4 ± 7.5 (29)<br>29 (21 – 51)                       | 0.217        |
| MoSvc    | 83 ± 87 (18)<br>44 (12 – 300)                        | 29 ± 18 (3)<br>35 (9 – 44)               | 100 ± 0 (1)<br>100 (100 – 100)        | 72 ± 73 (29)<br>42 (9 – 300)                          | 0.307        |
| PriorTBI | 1.00 ± 1.53 (18)<br>0.5 (0 – 6)                      | 1.00 ± 1.00 (3)<br>1 (0 – 2)             | 1.00 ± 0.00 (1)<br>1 (1 – 1)          | 1.28 ± 2.14 (29)<br>1 (0 – 10)                        | 1.000        |
| Blasts   | 3.7 ± 5.7 (18)<br>1 (1 – 23)                         | 11.0 ± 12.5 (3)<br>7 (1 – 25)            | 1.0 ± 0.0 (1)<br>1 (1 – 1)            | 4.5 ± 6.3 (29)<br>2 (1 – 25)                          | <b>0.098</b> |
| Delay    | 3.22 ± 1.42 (18)<br>3.04 (1.25 – 5.83)               | 3.11 ± 0.97 (3)<br>2.92 (2.25 – 4.17)    | 3.92 ± 0.00 (1)<br>3.92 (3.92 – 3.92) | 3.35 ± 1.21 (29)<br>3.25 (1.25 – 5.83)                | 0.899        |
| Tobacco  | 0.12 ± 0.22 (18)<br>0 (0 – 0.67)                     | 0.22 ± 0.38 (3)<br>0 (0 – 0.67)          | 1.50 ± 0.00 (1)<br>1.5 (1.5 – 1.5)    | 0.27 ± 0.50 (29)<br>0 (0 – 2)                         | 0.505        |
| Educ     | 13.28 ± 2.00 (18)<br>12.5 (11 – 19)                  | 11.83 ± 1.76 (3)<br>12 (10 – 13.5)       | 12.00 ± 0.00 (1)<br>12 (12 – 12)      | 13.02 ± 2.01 (29)<br>12 (9 – 19)                      | 0.256        |
| HBOTn    | 39.83 ± 0.51 (18)<br>40 (38 – 40)                    | 39.33 ± 1.15 (3)<br>40 (38 – 40)         | 40.00 ± 0.00 (1)<br>40 (40 – 40)      | 39.72 ± 0.65 (29)<br>40 (38 – 40)                     | 0.207        |
| HBOTd    | 29.1 ± 2.1 (18)<br>29 (23 – 33)                      | 31.3 ± 3.5 (3)<br>31 (28 – 35)           | 44.0 ± 0.0 (1)<br>44 (44 – 44)        | 30.9 ± 4.5 (29)<br>30 (23 – 44)                       | 0.138        |
| GreenIR  | 87.7 ± 11.8 (18)<br>90 (60 – 100)                    | 89.3 ± 10.1 (3)<br>88 (80 – 100)         | 90.0 ± 0.0 (1)<br>90 (90 – 90)        | 89.2 ± 12.1 (29)<br>90 (58 – 100)                     | 0.827        |
| GreenDR  | 86.9 ± 12.7 (18)<br>91.5 (60 – 100)                  | 89.3 ± 9.3 (3)<br>85 (83 – 100)          | 93.0 ± 0.0 (1)<br>93 (93 – 93)        | 88.6 ± 11.6 (29)<br>93 (60 – 100)                     | 0.761        |
| GreenCNS | 83.7 ± 14.9 (18)<br>86.5 (55 – 100)                  | 85.0 ± 13.2 (3)<br>80 (75 – 100)         | 83.0 ± 0.0 (1)<br>83 (83 – 83)        | 85.6 ± 13.8 (29)<br>88 (55 – 100)                     | 0.886        |
| GreenMC  | 74.3 ± 18.4 (18)<br>72.5 (40 – 100)                  | 80.0 ± 20.0 (3)<br>80 (60 – 100)         | 85.0 ± 0.0 (1)<br>85 (85 – 85)        | 77.5 ± 18.1 (29)<br>85 (40 – 100)                     | 0.627        |
| GreenFR  | 53.2 ± 20.7 (18)<br>46.5 (25 – 100)                  | 51.0 ± 7.9 (3)<br>48 (45 – 60)           | 68.0 ± 0.0 (1)<br>68 (68 – 68)        | 51.9 ± 21.9 (29)<br>48 (13 – 100)                     | 0.859        |
| AMI      | 2.0 ± 14.2 (15)<br>-1 (-26 – 22)<br>p = 0.594        | 4.0 ± 7.1 (2)<br>4 (-1 – 9)<br>p = 0.570 | 7.0 ± 0.0 (1)<br>7 (7 – 7)            | 2.8 ± 11.9 (24)<br>5.5 (-26 – 22)<br>p = 0.264        | 0.850        |
| VMI      | 2.6 ± 15.5 (15)<br>3 (-30 – 30)<br>p = 0.526         | 0.0 ± 1.4 (2)<br>0 (-1 – 1)<br>p = 1.000 | 8.0 ± 0.0 (1)<br>8 (8 – 8)            | 3.9 ± 13.8 (24)<br>3 (-30 – 30)<br>p = 0.177          | 0.821        |
| VWMI     | 7.0 ± 12.0 (15)<br>10 (-18 – 25)<br><b>p = 0.041</b> | 5.0 ± 2.8 (2)<br>5 (3 – 7)<br>p = 0.242  | 11.0 ± 0.0 (1)<br>11 (11 – 11)        | 6.8 ± 10.0 (24)<br>7.5 (-18 – 25)<br><b>p = 0.003</b> | 0.823        |

|                |                                                            |                                                    |                                    |                                                          |              |
|----------------|------------------------------------------------------------|----------------------------------------------------|------------------------------------|----------------------------------------------------------|--------------|
| <b>DMI</b>     | 4.7 ± 14.3 (15)<br>4 (-21 – 26)<br>p = 0.227               | 2.0 ± 0.0 (2)<br>2 (2 – 2)                         | 14.0 ± 0.0 (1)<br>14 (14 – 14)     | 5.7 ± 12.0 (24)<br>5.5 (-21 – 26)<br><b>p = 0.029</b>    | 0.801        |
| <b>IQ</b>      | 14.2 ± 12.4 (18)<br>13.5 (-9 – 47)<br><b>p &lt; 0.001</b>  | 10.3 ± 7.2 (3)<br>14 (2 – 15)<br>p = 0.132         | 18.0 ± 0.0 (1)<br>18 (18 – 18)     | 14.2 ± 10.3 (29)<br>15 (-9 – 47)<br><b>p &lt; 0.001</b>  | 0.607        |
| <b>DelWMS</b>  | 14.8 ± 14.1 (18)<br>17 (-6 – 36)<br><b>p &lt; 0.001</b>    | 13.3 ± 1.5 (3)<br>13 (12 – 15)<br><b>p = 0.004</b> | 21.0 ± 0.0 (1)<br>21 (21 – 21)     | 15.2 ± 13.9 (29)<br>17 (-19 – 38)<br><b>p &lt; 0.001</b> | 0.864        |
| <b>WrkWMS</b>  | 10.1 ± 11.9 (18)<br>8 (-15 – 29)<br><b>p = 0.002</b>       | 18.3 ± 13.1 (3)<br>17 (6 – 32)<br>p = 0.135        | 10.0 ± 0.0 (1)<br>10 (10 – 10)     | 11.3 ± 10.5 (29)<br>10 (-15 – 32)<br><b>p &lt; 0.001</b> | 0.283        |
| <b>Stroop</b>  | 9.6 ± 13.6 (18)<br>6 (-10 – 39)<br><b>p = 0.008</b>        | 14.3 ± 14.5 (3)<br>14 (0 – 29)<br>p = 0.229        | 25.0 ± 0.0 (1)<br>25 (25 – 25)     | 10.9 ± 12.2 (29)<br>10 (-10 – 39)<br><b>p &lt; 0.001</b> | 0.586        |
| <b>TOVAVar</b> | 13.8 ± 21.2 (18)<br>9 (-30 – 48)<br><b>p = 0.013</b>       | -12.0 ± 52.4 (3)<br>2 (-70 – 32)<br>p = 0.730      | 0.0 ± 0.0 (1)<br>0 (0 – 0)         | 8.6 ± 25.3 (29)<br>8 (-70 – 48)<br><b>p = 0.078</b>      | 0.132        |
| <b>QOL</b>     | 30 ± 37 (18)<br>24 (-37 – 96)<br><b>p = 0.003</b>          | 31 ± 13 (3)<br>37 (17 – 40)<br><b>p = 0.049</b>    | 32 ± 0 (1)<br>32 (32 – 32)         | 28 ± 32 (29)<br>24 (-37 – 96)<br><b>p &lt; 0.001</b>     | 0.938        |
| <b>PHQ9Dep</b> | -10.1 ± 7.0 (18)<br>-11.5 (-21 – 5)<br><b>p &lt; 0.001</b> | -6.0 ± 3.6 (3)<br>-7 (-9 – -2)<br>p = 0.102        | -4.0 ± 0.0 (1)<br>-4 (-4 – -4)     | -7.9 ± 6.8 (29)<br>-7 (-21 – 5)<br><b>p &lt; 0.001</b>   | 0.339        |
| <b>GAD7Anx</b> | -6.8 ± 6.2 (18)<br>-8 (-14 – 2)<br><b>p &lt; 0.001</b>     | -1.3 ± 4.5 (3)<br>-1 (-6 – 3)<br>p = 0.660         | -6.0 ± 0.0 (1)<br>-6 (-6 – -6)     | -5.4 ± 5.9 (29)<br>-5 (-14 – 4)<br><b>p &lt; 0.001</b>   | 0.165        |
| <b>CogPBN</b>  | 23.5 ± 16.1 (18)<br>17.5 (5 – 50)<br><b>p &lt; 0.001</b>   | 1.7 ± 7.6 (3)<br>0 (-5 – 10)<br>p = 0.742          | 30.0 ± 0.0 (1)<br>30 (30 – 30)     | 20.4 ± 17.4 (29)<br>15 (-10 – 50)<br><b>p &lt; 0.001</b> | <b>0.035</b> |
| <b>PhysPBN</b> | 23.3 ± 17.4 (18)<br>20 (0 – 55)<br><b>p &lt; 0.001</b>     | 20.0 ± 0.0 (3)<br>20 (20 – 20)                     | -10.0 ± 0.0 (1)<br>-10 (-10 – -10) | 20.7 ± 16.2 (29)<br>20 (-10 – 55)<br><b>p &lt; 0.001</b> | 0.748        |
| <b>EmoPBN</b>  | 30.1 ± 17.8 (18)<br>30 (5 – 60)<br><b>p &lt; 0.001</b>     | 26.7 ± 17.6 (3)<br>25 (10 – 45)<br>p = 0.119       | 30.0 ± 0.0 (1)<br>30 (30 – 30)     | 31.1 ± 18.9 (29)<br>30 (5 – 80)<br><b>p &lt; 0.001</b>   | 0.763        |
| <b>Inatt</b>   | 10.3 ± 25.6 (18)<br>3 (-48 – 60)<br>p = 0.104              | -1.7 ± 10.6 (3)<br>0 (-13 – 8)<br>p = 0.811        | 61.0 ± 0.0 (1)<br>61 (61 – 61)     | 8.0 ± 27.8 (29)<br>0 (-62 – 61)<br>p = 0.134             | 0.440        |
| <b>Impls</b>   | 6.9 ± 17.8 (18)<br>4.5 (-25 – 48)<br>p = 0.116             | 26.3 ± 24.4 (3)<br>17 (8 – 54)<br>p = 0.202        | 60.0 ± 0.0 (1)<br>60 (60 – 60)     | 11.9 ± 20.2 (29)<br>8 (-25 – 60)<br><b>p = 0.004</b>     | 0.111        |
| <b>RxTm</b>    | 5.5 ± 16.0 (18)<br>8 (-23 – 35)<br>p = 0.163               | -4.7 ± 27.5 (3)<br>-5 (-32 – 23)<br>p = 0.797      | -14.0 ± 0.0 (1)<br>-14 (-14 – -14) | 3.5 ± 18.2 (29)<br>5 (-32 – 43)<br>p = 0.312             | 0.365        |

|       |                                                               |                                                       |                                          |                                                               |       |
|-------|---------------------------------------------------------------|-------------------------------------------------------|------------------------------------------|---------------------------------------------------------------|-------|
| TapD  | 8.9 ± 19.3 (18)<br>6 (-20 – 68)<br><b>p = 0.066</b>           | 8.0 ± 3.0 (3)<br>8 (5 – 11)<br><b>p = 0.044</b>       | 13.0 ± 0.0 (1)<br>13 (13 – 13)           | 6.4 ± 16.0 (29)<br>5 (-20 – 68)<br><b>p = 0.040</b>           | 0.935 |
| TapND | 8.4 ± 15.4 (18)<br>4.5 (-6 – 57)<br><b>p = 0.033</b>          | 0.0 ± 18.0 (3)<br>0 (-18 – 18)<br>p = 1.000           | 7.0 ± 0.0 (1)<br>7 (7 – 7)               | 4.5 ± 14.7 (29)<br>1 (-18 – 57)<br>p = 0.111                  | 0.399 |
| PegD  | 10.7 ± 14.4 (18)<br>8.5 (-14 – 33)<br><b>p = 0.006</b>        | 10.0 ± 21.7 (3)<br>7 (-10 – 33)<br>p = 0.508          | 25.0 ± 0.0 (1)<br>25 (25 – 25)           | 11.2 ± 13.9 (29)<br>9 (-14 – 33)<br><b>p &lt; 0.001</b>       | 0.945 |
| PegND | 2.1 ± 13.8 (18)<br>0 (-30 – 36)<br>p = 0.526                  | 5.0 ± 20.2 (3)<br>13 (-18 – 20)<br>p = 0.710          | 2.0 ± 0.0 (1)<br>2 (2 – 2)               | 4.2 ± 13.6 (29)<br>3 (-30 – 36)<br>p = 0.105                  | 0.755 |
| Parag | -1.2 ± 5.3 (18)<br>-1 (-14 – 8)<br>p = 0.367                  | -3.0 ± 2.6 (3)<br>-4 (-5 – 0)<br>p = 0.189            | 6.0 ± 0.0 (1)<br>6 (6 – 6)               | -0.9 ± 4.6 (29)<br>-1 (-14 – 8)<br>p = 0.324                  | 0.573 |
| RPCSQ | -14.6 ± 12.3 (18)<br>-14.5 (-38 – 12)<br><b>p &lt; 0.001</b>  | -11.0 ± 4.6 (3)<br>-12 (-15 – -6)<br><b>p = 0.053</b> | -13.0 ± 0.0 (1)<br>-13 (-13 – -13)       | -13.5 ± 10.4 (29)<br>-13 (-38 – 12)<br><b>p &lt; 0.001</b>    | 0.627 |
| PCLM  | -18.0 ± 17.2 (18)<br>-19 (-54 – 10)<br><b>p &lt; 0.001</b>    | -8.3 ± 1.5 (3)<br>-8 (-10 – -7)<br><b>p = 0.011</b>   | -12.0 ± 0.0 (1)<br>-12 (-12 – -12)       | -16.6 ± 16.2 (29)<br>-16 (-54 – 10)<br><b>p &lt; 0.001</b>    | 0.352 |
| LG030 | -0.65 ± 1.67 (18)<br>-0.63 (-3.96 – 2.11)<br>p = 0.118        | 1.10 ± 1.29 (3)<br>0.83 (-0.04 – 2.5)<br>p = 0.278    | 0.61 ± 0.00 (1)<br>0.61 (0.61 – 0.61)    | -0.39 ± 1.59 (29)<br>-0.14 (-3.96 – 2.5)<br>p = 0.198         | 0.103 |
| LG060 | -0.72 ± 1.25 (18)<br>-1.01 (-2.7 – 2.27)<br><b>p = 0.026</b>  | -0.13 ± 1.27 (3)<br>-0.14 (-1.4 – 1.14)<br>p = 0.873  | 0.64 ± 0.00 (1)<br>0.64 (0.64 – 0.64)    | -0.69 ± 1.23 (29)<br>-0.86 (-2.7 – 2.27)<br><b>p = 0.005</b>  | 0.462 |
| LG090 | -0.34 ± 1.74 (18)<br>0.07 (-3.71 – 2.98)<br>p = 0.418         | 0.38 ± 2.78 (3)<br>1.28 (-2.74 – 2.59)<br>p = 0.836   | -0.34 ± 0.00 (1)<br>-0.34 (-0.34 – 0.34) | -0.09 ± 1.75 (29)<br>0 (-3.71 – 3.66)<br>p = 0.779            | 0.546 |
| LG120 | -0.42 ± 1.84 (18)<br>-0.58 (-3.07 – 2.7)<br>p = 0.345         | 0.62 ± 2.84 (3)<br>0.6 (-2.22 – 3.46)<br>p = 0.743    | -1.49 ± 0.00 (1)<br>-1.49 (-1.49 – 1.49) | -0.27 ± 2.12 (29)<br>-0.8 (-3.33 – 4.54)<br>p = 0.491         | 0.409 |
| LG150 | 0.02 ± 2.16 (18)<br>0.45 (-4.6 – 3.55)<br>p = 0.966           | -1.06 ± 2.46 (3)<br>-1.4 (-3.34 – 1.56)<br>p = 0.534  | -3.91 ± 0.00 (1)<br>-3.91 (-3.91 – 3.91) | -0.47 ± 2.21 (29)<br>0.19 (-4.6 – 3.55)<br>p = 0.265          | 0.439 |
| LGAI1 | -0.42 ± 0.74 (18)<br>-0.58 (-1.93 – 0.73)<br><b>p = 0.028</b> | 0.18 ± 1.62 (3)<br>0.44 (-1.56 – 1.66)<br>p = 0.866   | -0.90 ± 0.00 (1)<br>-0.9 (-0.9 – -0.9)   | -0.38 ± 0.95 (29)<br>-0.57 (-2.27 – 1.66)<br><b>p = 0.039</b> | 0.286 |

|       |                                                            |                                                             |                                          |                                                               |              |
|-------|------------------------------------------------------------|-------------------------------------------------------------|------------------------------------------|---------------------------------------------------------------|--------------|
| LW060 | 0.26 ± 2.10 (18)<br>0.11 (-3.52 – 4.85)<br>p = 0.603       | -4.47 ± 3.38 (3)<br>-4.22 (-7.97 – 1.23)<br>p = 0.149       | 1.48 ± 0.00 (1)<br>1.48 (1.48 – 1.48)    | -0.54 ± 2.75 (29)<br>-0.7 (-7.97 – 4.85)<br>p = 0.303         | <b>0.003</b> |
| LW120 | -1.03 ± 2.98 (18)<br>-1.21 (-6.12 – 4.88)<br>p = 0.160     | -1.19 ± 1.70 (3)<br>-1.73 (-2.55 – 0.72)<br>p = 0.350       | -2.56 ± 0.00 (1)<br>-2.56 (-2.56 – 2.56) | -1.06 ± 2.74 (29)<br>-0.87 (-6.12 – 4.88)<br><b>p = 0.046</b> | 0.932        |
| LWAll | -0.39 ± 2.16 (18)<br>0.11 (-4.62 – 3.11)<br>p = 0.461      | -2.83 ± 2.11 (3)<br>-1.75 (-5.26 – 1.48)<br>p = 0.146       | -0.54 ± 0.00 (1)<br>-0.54 (-0.54 – 0.54) | -0.80 ± 2.23 (29)<br>-0.79 (-5.26 – 3.11)<br><b>p = 0.064</b> | <b>0.085</b> |
| RG030 | -0.17 ± 1.55 (18)<br>-0.69 (-2.32 – 3.19)<br>p = 0.640     | -0.73 ± 0.90 (3)<br>-0.79 (-1.6 – 0.2)<br>p = 0.296         | 0.38 ± 0.00 (1)<br>0.38 (0.38 – 0.38)    | -0.28 ± 1.52 (29)<br>-0.57 (-3.84 – 3.19)<br>p = 0.333        | 0.559        |
| RG060 | -0.44 ± 1.40 (18)<br>-0.49 (-2.7 – 3.38)<br>p = 0.198      | -0.61 ± 0.88 (3)<br>-0.17 (-1.62 – 0.05)<br>p = 0.350       | 1.84 ± 0.00 (1)<br>1.84 (1.84 – 1.84)    | -0.40 ± 1.33 (29)<br>-0.51 (-2.7 – 3.38)<br>p = 0.114         | 0.841        |
| RG090 | -0.34 ± 1.14 (18)<br>-0.2 (-3.53 – 1.24)<br>p = 0.221      | 1.01 ± 1.37 (3)<br>1.03 (-0.37 – 2.37)<br>p = 0.330         | 0.12 ± 0.00 (1)<br>0.12 (0.12 – 0.12)    | 0.08 ± 1.32 (29)<br>0.04 (-3.53 – 3.35)<br>p = 0.736          | <b>0.079</b> |
| RG120 | -0.15 ± 1.72 (18)<br>-0.08 (-4.63 – 2.75)<br>p = 0.708     | 1.04 ± 1.93 (3)<br>1.66 (-1.13 – 2.58)<br>p = 0.451         | 0.41 ± 0.00 (1)<br>0.41 (0.41 – 0.41)    | -0.06 ± 1.80 (29)<br>0.05 (-4.63 – 2.75)<br>p = 0.851         | 0.287        |
| RG150 | -0.29 ± 1.31 (18)<br>-0.55 (-2.84 – 1.61)<br>p = 0.363     | -1.01 ± 1.06 (3)<br>-0.44 (-2.24 – 0.37)<br>p = 0.240       | 1.82 ± 0.00 (1)<br>1.82 (1.82 – 1.82)    | -0.32 ± 1.35 (29)<br>-0.46 (-2.84 – 1.97)<br>p = 0.217        | 0.377        |
| RGAll | -0.28 ± 0.54 (18)<br>-0.38 (-1 – 0.66)<br><b>p = 0.043</b> | -0.06 ± 0.77 (3)<br>0.36 (-0.95 – 0.4)<br>p = 0.903         | 0.91 ± 0.00 (1)<br>0.91 (0.91 – 0.91)    | -0.20 ± 0.59 (29)<br>-0.3 (-1.25 – 0.91)<br><b>p = 0.087</b>  | 0.547        |
| RW060 | -1.30 ± 3.18 (18)<br>-1.69 (-6.58 – 5.58)<br>p = 0.102     | -2.19 ± 4.73 (3)<br>-2.18 (-6.92 – 2.53)<br>p = 0.507       | 0.60 ± 0.00 (1)<br>0.6 (0.6 – 0.6)       | -1.19 ± 2.92 (29)<br>-1.25 (-6.92 – 5.58)<br><b>p = 0.037</b> | 0.677        |
| RW120 | 0.00 ± 2.74 (18)<br>0.76 (-4.25 – 5.55)<br>p = 0.998       | -3.56 ± 1.19 (3)<br>-3.82 (-4.6 – 2.26)<br><b>p = 0.035</b> | 3.15 ± 0.00 (1)<br>3.15 (3.15 – 3.15)    | -0.42 ± 2.73 (29)<br>0.1 (-4.6 – 5.55)<br>p = 0.413           | <b>0.042</b> |
| RWAll | -0.65 ± 2.47 (18)<br>-1.25 (-4.07 – 4.28)<br>p = 0.282     | -2.87 ± 1.78 (3)<br>-3 (-4.59 – -1.03)<br>p = 0.108         | 1.88 ± 0.00 (1)<br>1.88 (1.88 – 1.88)    | -0.80 ± 2.30 (29)<br>-1.03 (-4.59 – 4.28)<br><b>p = 0.070</b> | 0.155        |
