# Supplementary material for: Case control study: hyperbaric oxygen treatment of mild traumatic brain injury persistent post-concussion syndrome and post-traumatic stress disorder
Source: PubMed Central journal article supplement — Med Gas Res. 2017 Oct 17;7(3):156–74. doi: 10.4103/2045-9912.215745 (PMC5674654; doi:10.4103/2045-9912.215745), 2017-10-17
Supplement: MGR-7-156_Suppl4.pdf [file MGR-7-156_Suppl4.pdf]

### Additional File 3: Contribution of Moderate TBI to Composite Data.

#### Analysis of HBOT Data

This document presents the results of statistical analyses carried out on the final data set. All descriptive tables present summaries in the following formats:

for numerical variables:

Mean  $\pm$  Standard Deviation (Number of Subjects)

Median (Minimum – Maximum)

for numerical variables representing changes between two time points:

Mean Change  $\pm$  Standard Deviation of Changes (Number of Subjects)

Median Change (Minimum Change – Maximum Change)

p value for significance of change

for categorical variables:

Count (Percentage of Total)

The designation (**np**) appearing after or below a p value indicates that a non-parametric test (like the Mann-Whitney U test) was performed instead of the classical test (like the Student t test).

Nominally significant p values ( $p \leq 0.05$ ) are highlighted in **red** text;

p values approaching significance ( $p < 0.10$ ) are highlighted in **orange** text.

No adjustments for multiplicity were applied, so each p value has a 1-in-20 chance of being significant ( $p \leq 0.05$ ) purely from random fluctuations alone, in the absence of any real effect.

To conserve horizontal space in the tables, variables are identified by brief names.

#### Baseline / Demographics

The analytical population of 29 subjects was divided into two groups based on whether the severity of the injury was considered **Mild** (*up to 30 minutes* of unconsciousness) or **Moderate** (*30 or more minutes* of unconsciousness). The p value in the rightmost column of the table indicates whether the variable was significantly different between mildly injured and moderately injured patients.

| Variable                  | Mild                                       | Moderate                                  | Total                                      | P-val         |
|---------------------------|--------------------------------------------|-------------------------------------------|--------------------------------------------|---------------|
| <b>Age</b>                | 30.3 $\pm$ 7.8 (24)<br>29.5 (21 – 51)      | 31.0 $\pm$ 6.7 (5)<br>29 (24 – 39)        | 30.4 $\pm$ 7.5 (29)<br>29 (21 – 51)        | 0.664<br>(np) |
| <b>Sex</b>                |                                            |                                           |                                            |               |
| <b>Female</b>             | 2 (8%)                                     | 0 (0%)                                    | 2 (7%)                                     | 1.000         |
| <b>Male</b>               | 22 (92%)                                   | 5 (100%)                                  | 27 (93%)                                   |               |
| <b>Total</b>              | 24 (100%)                                  | 5 (100%)                                  | 29 (100%)                                  |               |
| <b>Delay to treatment</b> | 3.31 $\pm$ 1.20 (24)<br>3.38 (1.25 – 5.83) | 3.53 $\pm$ 1.39 (5)<br>2.92 (2.08 – 5.33) | 3.35 $\pm$ 1.21 (29)<br>3.25 (1.25 – 5.83) | 0.718         |

|                                  |                                  |                                |                                |               |
|----------------------------------|----------------------------------|--------------------------------|--------------------------------|---------------|
| <b>Unconc</b>                    |                                  |                                |                                |               |
| <1min                            | 10 (42%)                         | 0 (0%)                         | 10 (34%)                       |               |
| 1-2min                           | 5 (21%)                          | 0 (0%)                         | 5 (17%)                        |               |
| 1Hour                            | 0 (0%)                           | 1 (20%)                        | 1 (3%)                         |               |
| 1min                             | 7 (29%)                          | 0 (0%)                         | 7 (24%)                        |               |
| 1min?                            | 1 (4%)                           | 0 (0%)                         | 1 (3%)                         |               |
| 2-3min                           | 1 (4%)                           | 0 (0%)                         | 1 (3%)                         |               |
| 2Hour                            | 0 (0%)                           | 1 (20%)                        | 1 (3%)                         |               |
| 4-5Hours                         | 0 (0%)                           | 1 (20%)                        | 1 (3%)                         |               |
| 8-10Hour                         | 0 (0%)                           | 1 (20%)                        | 1 (3%)                         |               |
| 9Hours                           | 0 (0%)                           | 1 (20%)                        | 1 (3%)                         |               |
| <b>Total</b>                     | <b>24 (100%)</b>                 | <b>5 (100%)</b>                | <b>29 (100%)</b>               |               |
| <b>Service</b>                   |                                  |                                |                                |               |
| Army                             | 13 (54%)                         | 2 (40%)                        | 15 (52%)                       | 0.651         |
| Marine                           | 11 (46%)                         | 3 (60%)                        | 14 (48%)                       |               |
| <b>Total</b>                     | <b>24 (100%)</b>                 | <b>5 (100%)</b>                | <b>29 (100%)</b>               |               |
| <b>Duty</b>                      |                                  |                                |                                |               |
| Active                           | 7 (29%)                          | 4 (80%)                        | 11 (38%)                       | <b>0.054</b>  |
| Retired                          | 17 (71%)                         | 1 (20%)                        | 18 (62%)                       |               |
| <b>Total</b>                     | <b>24 (100%)</b>                 | <b>5 (100%)</b>                | <b>29 (100%)</b>               |               |
| <b>Months of Service</b>         | 70 ± 75 (24)<br>38 (9 – 300)     | 81 ± 68 (5)<br>60 (23 – 197)   | 72 ± 73 (29)<br>42 (9 – 300)   | 0.371<br>(np) |
| <b>Blasts (number)</b>           | 4.3 ± 5.7 (24)<br>2 (1 – 25)     | 5.6 ± 9.7 (5)<br>1 (1 – 23)    | 4.5 ± 6.3 (29)<br>2 (1 – 25)   | 0.667<br>(np) |
| <b>PriorTBI</b>                  | 1.33 ± 2.33 (24)<br>0.5 (0 – 10) | 1.00 ± 0.71 (5)<br>1 (0 – 2)   | 1.28 ± 2.14 (29)<br>1 (0 – 10) | 0.559<br>(np) |
| <b>Diagnosis:</b>                |                                  |                                |                                |               |
| TBI                              | 3 (12%)                          | 0 (0%)                         | 3 (10%)                        | 1.000         |
| TBI/PTSD                         | 21 (88%)                         | 5 (100%)                       | 26 (90%)                       |               |
| <b>Total</b>                     | <b>24 (100%)</b>                 | <b>5 (100%)</b>                | <b>29 (100%)</b>               |               |
| <b>PTSD</b>                      |                                  |                                |                                |               |
| No                               | 3 (12%)                          | 0 (0%)                         | 3 (10%)                        | 1.000         |
| Yes                              | 21 (88%)                         | 5 (100%)                       | 26 (90%)                       |               |
| <b>Total</b>                     | <b>24 (100%)</b>                 | <b>5 (100%)</b>                | <b>29 (100%)</b>               |               |
| <b>Tobacco-packs per day</b>     | 0.28 ± 0.53 (24)<br>0 (0 – 2)    | 0.20 ± 0.27 (5)<br>0 (0 – 0.5) | 0.27 ± 0.50 (29)<br>0 (0 – 2)  | 1.000<br>(np) |
| <b>Alcohol</b>                   |                                  |                                |                                |               |
| 0:None/Rare                      | 16 (67%)                         | 2 (40%)                        | 18 (62%)                       | 0.366         |
| 1: Occasional                    | 3 (12%)                          | 1 (20%)                        | 4 (14%)                        |               |
| 2: Modest                        | 4 (17%)                          | 1 (20%)                        | 5 (17%)                        |               |
| 3: Moderate                      | 1 (4%)                           | 1 (20%)                        | 2 (7%)                         |               |
| <b>Total</b>                     | <b>24 (100%)</b>                 | <b>5 (100%)</b>                | <b>29 (100%)</b>               |               |
| <b>Psycho-Active Medications</b> |                                  |                                |                                |               |
| No                               | 7 (29%)                          | 0 (0%)                         | 7 (24%)                        | 0.296         |
| Yes                              | 17 (71%)                         | 5 (100%)                       | 22 (76%)                       |               |
| <b>Total</b>                     | <b>24 (100%)</b>                 | <b>5 (100%)</b>                | <b>29 (100%)</b>               |               |

|                                    |                                    |                                  |                                   |               |
|------------------------------------|------------------------------------|----------------------------------|-----------------------------------|---------------|
| <b>HBOT (total number)</b>         | 39.75 ± 0.61 (24)<br>40 (38 – 40)  | 39.60 ± 0.89 (5)<br>40 (38 – 40) | 39.72 ± 0.65 (29)<br>40 (38 – 40) | 0.826<br>(np) |
| <b>HBOT (total calendar days)</b>  | 31.2 ± 4.9 (24)<br>30 (23 – 44)    | 29.2 ± 0.8 (5)<br>29 (28 – 30)   | 30.9 ± 4.5 (29)<br>30 (23 – 44)   | 0.483<br>(np) |
| <b>Imaging</b>                     |                                    |                                  |                                   |               |
| <b>Abnormal</b>                    | 6 (25%)                            | 2 (40%)                          | 8 (28%)                           | 0.597         |
| <b>Normal</b>                      | 18 (75%)                           | 3 (60%)                          | 21 (72%)                          |               |
| <b>Total</b>                       | 24 (100%)                          | 5 (100%)                         | 29 (100%)                         |               |
| <b>Psycho-Active Med Change</b>    |                                    |                                  |                                   |               |
| <b>Decr</b>                        | 8 (33%)                            | 1 (20%)                          | 9 (31%)                           | <b>0.008</b>  |
| <b>Incr</b>                        | 3 (12%)                            | 0 (0%)                           | 3 (10%)                           |               |
| <b>NoChg</b>                       | 13 (54%)                           | 1 (20%)                          | 14 (48%)                          |               |
| <b>Stop</b>                        | 0 (0%)                             | 3 (60%)                          | 3 (10%)                           |               |
| <b>Total</b>                       | 24 (100%)                          | 5 (100%)                         | 29 (100%)                         |               |
| <b>Middle Ear Barotrauma</b>       |                                    |                                  |                                   |               |
| <b>No</b>                          | 18 (75%)                           | 5 (100%)                         | 23 (79%)                          | 0.553         |
| <b>Yes</b>                         | 6 (25%)                            | 0 (0%)                           | 6 (21%)                           |               |
| <b>Total</b>                       | 24 (100%)                          | 5 (100%)                         | 29 (100%)                         |               |
| <b>Upper Respiratory Infection</b> |                                    |                                  |                                   |               |
| <b>No</b>                          | 18 (75%)                           | 5 (100%)                         | 23 (79%)                          | 0.553         |
| <b>Yes</b>                         | 6 (25%)                            | 0 (0%)                           | 6 (21%)                           |               |
| <b>Total</b>                       | 24 (100%)                          | 5 (100%)                         | 29 (100%)                         |               |
| <b>Symptom Change</b>              |                                    |                                  |                                   |               |
| <b>No</b>                          | 16 (67%)                           | 3 (60%)                          | 19 (66%)                          | 1.000         |
| <b>Yes</b>                         | 8 (33%)                            | 2 (40%)                          | 10 (34%)                          |               |
| <b>Total</b>                       | 24 (100%)                          | 5 (100%)                         | 29 (100%)                         |               |
| <b>RPCSQ-pre HBOT</b>              | 38.1 ± 7.9 (24)<br>39.5 (18 – 52)  | 32.0 ± 13.9 (5)<br>34 (14 – 47)  | 37.0 ± 9.2 (29)<br>39 (14 – 52)   | 0.184         |
| <b>RPCSQ-post HBOT</b>             | 24.7 ± 12.3 (24)<br>24.5 (0 – 49)  | 18.0 ± 10.3 (5)<br>21 (6 – 31)   | 23.5 ± 12.1 (29)<br>23 (0 – 49)   | 0.270         |
| <b>PCLM-pre HBOT</b>               | 64.0 ± 15.2 (24)<br>67 (21 – 84)   | 61.0 ± 20.8 (5)<br>68 (32 – 80)  | 63.4 ± 15.9 (29)<br>68 (21 – 84)  | 0.713         |
| <b>PCLM-post HBOT</b>              | 47.7 ± 16.4 (24)<br>45.5 (17 – 81) | 42.8 ± 18.4 (5)<br>47 (23 – 61)  | 46.8 ± 16.5 (29)<br>46 (17 – 81)  | 0.559         |
| <b>Combat Experience Scale</b>     | 29.4 ± 10.6 (24)<br>29 (9 – 58)    | 33.4 ± 5.8 (5)<br>35 (26 – 40)   | 30.1 ± 10.0 (29)<br>29 (9 – 58)   | 0.426         |
| <b>Education</b>                   | 13.13 ± 2.24 (24)<br>12.5 (9 – 19) | 12.90 ± 1.34 (5)<br>12 (12 – 15) | 13.09 ± 2.09 (29)<br>12 (9 – 19)  | 0.953<br>(np) |
| <b>Handed</b>                      |                                    |                                  |                                   |               |
| <b>Left</b>                        | 2 (8%)                             | 0 (0%)                           | 2 (7%)                            | 1.000         |
| <b>Right</b>                       | 22 (92%)                           | 5 (100%)                         | 27 (93%)                          |               |
| <b>Total</b>                       | 24 (100%)                          | 5 (100%)                         | 29 (100%)                         |               |

|                                        |                                  |                                  |                                  |               |
|----------------------------------------|----------------------------------|----------------------------------|----------------------------------|---------------|
| <b>Michigan Alcohol Screening Test</b> | 1.83 ± 1.66 (24)<br>1 (0 – 5)    | 2.00 ± 1.22 (5)<br>2 (0 – 3)     | 1.86 ± 1.57 (29)<br>2 (0 – 5)    | 0.702<br>(np) |
| <b>Drug Abuse Screening Test</b>       | 0.71 ± 0.91 (24)<br>0.5 (0 – 3)  | 0.60 ± 1.34 (5)<br>0 (0 – 3)     | 0.69 ± 0.97 (29)<br>0 (0 – 3)    | 0.420<br>(np) |
| <b>Disability Rating Scale</b>         | 1.58 ± 1.18 (24)<br>1.25 (0 – 3) | 1.80 ± 1.15 (5)<br>1.5 (0.5 – 3) | 1.62 ± 1.15 (29)<br>1.5 (0 – 3)  | 0.678<br>(np) |
| <b>Percent Back to Normal Rating</b>   | 128 ± 349 (24)<br>45 (0 – 1,750) | 74 ± 35 (5)<br>84 (21 – 107)     | 119 ± 318 (29)<br>50 (0 – 1,750) | 0.298<br>(np) |
| <b>Race</b>                            |                                  |                                  |                                  |               |
| <b>Asian</b>                           | 0 (0%)                           | 1 (20%)                          | 1 (3%)                           | <b>0.041</b>  |
| <b>Black</b>                           | 0 (0%)                           | 1 (20%)                          | 1 (3%)                           |               |
| <b>Hispanic</b>                        | 3 (12%)                          | 0 (0%)                           | 3 (10%)                          |               |
| <b>White</b>                           | 21 (88%)                         | 3 (60%)                          | 24 (83%)                         |               |
| <b>Total</b>                           | 24 (100%)                        | 5 (100%)                         | 29 (100%)                        |               |
