# Supplementary material for: Case control study: hyperbaric oxygen treatment of mild traumatic brain injury persistent post-concussion syndrome and post-traumatic stress disorder
Source: PubMed Central journal article supplement — Med Gas Res. 2017 Oct 17;7(3):156–74. doi: 10.4103/2045-9912.215745 (PMC5674654; doi:10.4103/2045-9912.215745), 2017-10-17
Supplement: MGR-7-156_Suppl5.pdf [file MGR-7-156_Suppl5.pdf]

## Additional File 4: Analysis of SPECT Data

The following analyses were carried out:

- Descriptive summaries and comparisons of pre-HBOT SPECT means (MCP), standard deviations (SD), and coefficients of variation (CV), by brain region (Left/Right, White/Gray, Angle), between 29 affected military subjects, and 29 matched normal controls.  
(Tables E.1, E.2, and E.3)
- Summary of SPECT MCP (E.4A), SD (E.4B), and CV (E.4C) at Pre-HBOT, 1-day Post-HBOT, 40-days Post-HBOT, by Region of Brain, in Military Subjects
- Analysis of changes in SPECT MCP (E.5A), SD (E.5B), and CV (E.5C) Between Pre-HBOT, 1-day Post-HBOT, 40-days Post-HBOT, by Region of Brain, in Military Subjects

All descriptive summary tables are in the format:

Mean  $\pm$  Standard Deviation

Median (Minimum – Maximum)

The changes between Pre-HBOT, 1 day Post-HBOT, and 40 days Post-HBOT in Table E.5.A, B, and C are summarized in the following format:

Mean Change  $\pm$  Standard Deviation of Changes

Median Change (Minimum Change – Maximum Change)

p value for significance of change

P values are calculated from the Student t test, and indicate whether the difference between military and control subjects, or the changes between time points are significant. Significant differences ( $p \leq 0.05$ ) are highlighted in red text, and near-significant differences ( $p < 0.10$ ) are highlighted in orange text.

**1. Summary of SPECT Mean Counts/Pixel (MCP) at Pre-HBOT  
(Comparison between Veterans and Normal Controls)**

| Section of Brain | Veterans (n=29)                      | Normals (n=29)                       | P-val        |
|------------------|--------------------------------------|--------------------------------------|--------------|
| Left Gray 030    | 1,543 ± 322<br>1,567 (923 – 2,294)   | 1,611 ± 245<br>1,574 (1,223 – 2,389) | 0.374        |
| Left Gray 060    | 1,575 ± 333<br>1,596 (950 – 2,302)   | 1,666 ± 259<br>1,654 (1,244 – 2,478) | 0.251        |
| Left Gray 090    | 1,555 ± 321<br>1,606 (957 – 2,214)   | 1,591 ± 252<br>1,602 (1,184 – 2,322) | 0.640        |
| Left Gray 120    | 1,572 ± 313<br>1,570 (966 – 2,331)   | 1,632 ± 273<br>1,614 (1,142 – 2,443) | 0.441        |
| Left Gray 150    | 1,682 ± 376<br>1,753 (671 – 2,258)   | 1,734 ± 292<br>1,734 (1,261 – 2,730) | 0.562        |
| Left Gray All    | 1,586 ± 322<br>1,625 (968 – 2,278)   | 1,647 ± 257<br>1,625 (1,243 – 2,472) | 0.428        |
| Left White 060   | 968 ± 238<br>912 (559 – 1,730)       | 1,071 ± 235<br>1,037 (646 – 1,619)   | 0.104        |
| Left White 120   | 933 ± 238<br>880 (556 – 1,641)       | 1,043 ± 224<br>1,008 (655 – 1,604)   | <b>0.074</b> |
| Left White All   | 951 ± 235<br>919 (558 – 1,686)       | 1,057 ± 225<br>1,033 (693 – 1,543)   | <b>0.083</b> |
| Right Gray 030   | 1,532 ± 319<br>1,547 (918 – 2,127)   | 1,590 ± 274<br>1,590 (1,212 – 2,480) | 0.457        |
| Right Gray 060   | 1,566 ± 323<br>1,535 (990 – 2,330)   | 1,689 ± 284<br>1,703 (1,255 – 2,587) | 0.128        |
| Right Gray 090   | 1,532 ± 307<br>1,530 (1,009 – 2,226) | 1,610 ± 274<br>1,563 (1,197 – 2,387) | 0.314        |
| Right Gray 120   | 1,543 ± 282<br>1,541 (939 – 2,160)   | 1,647 ± 282<br>1,626 (1,244 – 2,466) | 0.165        |
| Right Gray 150   | 1,668 ± 323<br>1,603 (948 – 2,457)   | 1,737 ± 264<br>1,681 (1,340 – 2,503) | 0.376        |
| Right Gray All   | 1,568 ± 302<br>1,564 (961 – 2,225)   | 1,655 ± 267<br>1,612 (1,266 – 2,485) | 0.253        |
| Right White 060  | 974 ± 220<br>937 (543 – 1,542)       | 1,084 ± 244<br>1,026 (686 – 1,664)   | <b>0.075</b> |
| Right White 120  | 901 ± 251<br>825 (508 – 1,790)       | 1,043 ± 223<br>993 (685 – 1,592)     | <b>0.027</b> |
| Right White All  | 938 ± 225<br>912 (526 – 1,666)       | 1,064 ± 225<br>1,015 (745 – 1,563)   | <b>0.037</b> |

## 2. Summary of SPECT Standard Deviations (SD) at Pre-HBOT (Comparison between Veterans and Normal Controls)

| Section of Brain | Veterans (n=29)                    | Normals (n=29)                     | p-val        |
|------------------|------------------------------------|------------------------------------|--------------|
| Left Gray 030    | 53.3 ± 20.3<br>46.2 (21.1 – 112.2) | 54.5 ± 17.6<br>52 (25.8 – 88.9)    | 0.812        |
| Left Gray 060    | 63.3 ± 21.9<br>60.8 (21.6 – 104.9) | 64.3 ± 21.4<br>61.7 (29.8 – 125.1) | 0.864        |
| Left Gray 090    | 56.4 ± 25.7<br>48.7 (18.7 – 119.1) | 64.7 ± 30.1<br>57.2 (29.3 – 172.7) | 0.264        |
| Left Gray 120    | 53.0 ± 21.3<br>49.8 (18.7 – 108)   | 56.2 ± 25.1<br>57.7 (8.7 – 106)    | 0.595        |
| Left Gray 150    | 69 ± 37<br>58 (22 – 165)           | 56 ± 28<br>53 (24 – 144)           | 0.150        |
| Left Gray All    | 58.9 ± 16.2<br>56.9 (35.2 – 88.4)  | 59.2 ± 15.9<br>56.4 (26.8 – 91.1)  | 0.951        |
| Left White 060   | 55.7 ± 26.3<br>50.3 (19.3 – 115.3) | 54.4 ± 21.4<br>48.5 (26.9 – 113.7) | 0.836        |
| Left White 120   | 53.9 ± 21.7<br>47.8 (28.8 – 98.4)  | 46.2 ± 18.2<br>39.6 (21.6 – 79.3)  | 0.151        |
| Left White All   | 54.8 ± 18.7<br>50.5 (26.6 – 88.3)  | 50.3 ± 13.7<br>49 (28 – 96.5)      | 0.302        |
| Right Gray 030   | 48.6 ± 18.7<br>46.8 (20 – 83.4)    | 49.1 ± 16.9<br>50.2 (15.6 – 82.7)  | 0.918        |
| Right Gray 060   | 54.5 ± 18.7<br>53.2 (26.5 – 104.4) | 58.9 ± 22.5<br>58.6 (20.6 – 113.1) | 0.421        |
| Right Gray 090   | 59.9 ± 20.4<br>60.1 (15.1 – 98.8)  | 55.2 ± 18.6<br>52.3 (23.6 – 103.5) | 0.364        |
| Right Gray 120   | 53.7 ± 23.9<br>51 (20.7 – 128)     | 49.6 ± 18.6<br>45.8 (20.9 – 98.7)  | 0.471        |
| Right Gray 150   | 60.0 ± 24.2<br>59.3 (18.7 – 116.5) | 47.9 ± 18.6<br>44.3 (25 – 99)      | <b>0.037</b> |
| Right Gray All   | 55.4 ± 12.6<br>56.1 (32.2 – 82)    | 52.2 ± 8.8<br>52.8 (36.8 – 71.4)   | 0.266        |
| Right White 060  | 63.2 ± 26.3<br>58.5 (22.5 – 113.8) | 52.6 ± 21.4<br>48.3 (15.8 – 103.6) | 0.098        |
| Right White 120  | 50.8 ± 18.4<br>52.9 (17.2 – 100.6) | 43.1 ± 19.7<br>38.1 (15.9 – 87.5)  | 0.130        |
| Right White All  | 57.0 ± 17.8<br>55.9 (29.3 – 89.7)  | 47.9 ± 13.3<br>45.6 (24 – 68.3)    | <b>0.030</b> |

### 3. Summary of SPECT Coefficient of Variation (CV) (100×SD/Mean) at Pre-HBOT. Comparison between Veterans and Normal Controls

| Section of Brain | Veterans (n=29)                    | Normals (n=29)                     | p-val             |
|------------------|------------------------------------|------------------------------------|-------------------|
| Left Gray 030    | 3.55 ± 1.49<br>3.24 (1.71 – 8.77)  | 3.39 ± 1.01<br>3.41 (1.8 – 5.39)   | 0.647             |
| Left Gray 060    | 4.04 ± 1.16<br>4.27 (1.36 – 6.01)  | 3.91 ± 1.37<br>3.47 (1.88 – 7.05)  | 0.708             |
| Left Gray 090    | 3.64 ± 1.60<br>3.12 (1.49 – 8)     | 4.09 ± 1.73<br>3.72 (1.84 – 10.1)  | 0.310             |
| Left Gray 120    | 3.33 ± 1.03<br>3.49 (1.48 – 5.09)  | 3.42 ± 1.48<br>3.44 (0.76 – 6.2)   | 0.783             |
| Left Gray 150    | 4.00 ± 1.61<br>4.22 (1.22 – 7.31)  | 3.20 ± 1.28<br>2.93 (1.38 – 6.48)  | <b>0.041</b>      |
| Left Gray All    | 3.71 ± 0.65<br>3.57 (2.41 – 5.34)  | 3.60 ± 0.87<br>3.65 (2.14 – 5.25)  | 0.594             |
| Left White 060   | 5.85 ± 2.69<br>6.21 (2.24 – 12.53) | 5.32 ± 2.36<br>4.71 (1.92 – 11.49) | 0.427             |
| Left White 120   | 5.87 ± 2.12<br>5.2 (2.72 – 11)     | 4.55 ± 1.80<br>3.89 (1.83 – 7.82)  | <b>0.013</b>      |
| Left White All   | 5.86 ± 1.86<br>5.72 (3.14 – 10.22) | 4.94 ± 1.53<br>4.9 (1.92 – 9.66)   | <b>0.043</b>      |
| Right Gray 030   | 3.15 ± 0.99<br>3.1 (1.7 – 5.63)    | 3.11 ± 1.05<br>3.13 (1.06 – 5.55)  | 0.891             |
| Right Gray 060   | 3.51 ± 1.02<br>3.41 (1.46 – 5.39)  | 3.53 ± 1.37<br>3.53 (1.12 – 8.04)  | 0.959             |
| Right Gray 090   | 3.92 ± 1.19<br>3.97 (1.06 – 6.73)  | 3.50 ± 1.25<br>3.15 (1.88 – 6.63)  | 0.190             |
| Right Gray 120   | 3.48 ± 1.38<br>3.33 (1.36 – 7.86)  | 3.04 ± 1.04<br>2.69 (0.91 – 6.03)  | 0.175             |
| Right Gray 150   | 3.65 ± 1.43<br>3.34 (1.01 – 7.24)  | 2.74 ± 0.85<br>2.55 (1.34 – 4.31)  | <b>0.005</b>      |
| Right Gray All   | 3.54 ± 0.59<br>3.56 (2.13 – 4.94)  | 3.18 ± 0.45<br>3.23 (2.07 – 4.17)  | <b>0.012</b>      |
| Right White 060  | 6.52 ± 2.24<br>6.45 (2.63 – 10.19) | 4.99 ± 2.10<br>4.77 (1.97 – 10.81) | <b>0.010</b>      |
| Right White 120  | 5.76 ± 1.89<br>5.67 (2.74 – 9.33)  | 4.18 ± 1.79<br>3.81 (1.44 – 8.06)  | <b>0.002</b>      |
| Right White All  | 6.14 ± 1.52<br>6.11 (2.8 – 9.23)   | 4.59 ± 1.19<br>4.34 (2.24 – 7.31)  | <b>&lt; 0.001</b> |

**4A. Summary of SPECT MCP by Region of Brain, in Military Subjects  
at Pre-HBOT, 1-day Post-HBOT, 40-days Post-HBOT**

| Section of Brain       | Pre-HBOT                                  | 1 day Post-HBOT                           | 40 days Post-HBOT                       |
|------------------------|-------------------------------------------|-------------------------------------------|-----------------------------------------|
| <b>Left Gray 030</b>   | 1,543 ± 322 (29)<br>1,567 (923 – 2,294)   | 1,590 ± 302 (29)<br>1,600 (891 – 2,354)   | 1,507 ± 325 (29)<br>1,502 (933 – 2,160) |
| <b>Left Gray 060</b>   | 1,575 ± 333 (29)<br>1,596 (950 – 2,302)   | 1,617 ± 282 (29)<br>1,569 (970 – 2,251)   | 1,547 ± 335 (29)<br>1,507 (943 – 2,339) |
| <b>Left Gray 090</b>   | 1,555 ± 321 (29)<br>1,606 (957 – 2,214)   | 1,625 ± 284 (29)<br>1,558 (893 – 2,196)   | 1,555 ± 351 (29)<br>1,608 (927 – 2,312) |
| <b>Left Gray 120</b>   | 1,572 ± 313 (29)<br>1,570 (966 – 2,331)   | 1,652 ± 285 (29)<br>1,645 (922 – 2,085)   | 1,545 ± 324 (29)<br>1,507 (971 – 2,265) |
| <b>Left Gray 150</b>   | 1,682 ± 376 (29)<br>1,753 (671 – 2,258)   | 1,744 ± 281 (29)<br>1,726 (990 – 2,222)   | 1,678 ± 344 (29)<br>1,676 (911 – 2,237) |
| <b>Left Gray All</b>   | 1,586 ± 322 (29)<br>1,625 (968 – 2,278)   | 1,646 ± 276 (29)<br>1,616 (933 – 2,177)   | 1,566 ± 329 (29)<br>1,558 (937 – 2,263) |
| <b>Left White 060</b>  | 968 ± 238 (29)<br>912 (559 – 1,730)       | 1,120 ± 217 (29)<br>1,147 (574 – 1,617)   | 1,007 ± 270 (29)<br>905 (611 – 1,609)   |
| <b>Left White 120</b>  | 933 ± 238 (29)<br>880 (556 – 1,641)       | 1,064 ± 192 (29)<br>1,073 (508 – 1,383)   | 949 ± 263 (29)<br>865 (579 – 1,550)     |
| <b>Left White All</b>  | 951 ± 235 (29)<br>919 (558 – 1,686)       | 1,092 ± 197 (29)<br>1,105 (541 – 1,463)   | 978 ± 260 (29)<br>905 (595 – 1,521)     |
| <b>Right Gray 030</b>  | 1,532 ± 319 (29)<br>1,547 (918 – 2,127)   | 1,564 ± 291 (29)<br>1,558 (955 – 2,352)   | 1,489 ± 344 (29)<br>1,474 (868 – 2,128) |
| <b>Right Gray 060</b>  | 1,566 ± 323 (29)<br>1,535 (990 – 2,330)   | 1,623 ± 264 (29)<br>1,644 (954 – 2,142)   | 1,535 ± 334 (29)<br>1,503 (953 – 2,212) |
| <b>Right Gray 090</b>  | 1,532 ± 307 (29)<br>1,530 (1,009 – 2,226) | 1,591 ± 250 (29)<br>1,623 (980 – 1,980)   | 1,529 ± 352 (29)<br>1,549 (870 – 2,161) |
| <b>Right Gray 120</b>  | 1,543 ± 282 (29)<br>1,541 (939 – 2,160)   | 1,622 ± 264 (29)<br>1,614 (897 – 2,087)   | 1,553 ± 355 (29)<br>1,510 (899 – 2,393) |
| <b>Right Gray 150</b>  | 1,668 ± 323 (29)<br>1,603 (948 – 2,457)   | 1,705 ± 305 (29)<br>1,667 (1,004 – 2,301) | 1,680 ± 375 (29)<br>1,666 (958 – 2,587) |
| <b>Right Gray All</b>  | 1,568 ± 302 (29)<br>1,564 (961 – 2,225)   | 1,621 ± 264 (29)<br>1,639 (958 – 2,092)   | 1,557 ± 345 (29)<br>1,581 (909 – 2,296) |
| <b>Right White 060</b> | 974 ± 220 (29)<br>937 (543 – 1,542)       | 1,078 ± 210 (29)<br>1,088 (585 – 1,459)   | 976 ± 247 (29)<br>886 (573 – 1,457)     |
| <b>Right White 120</b> | 901 ± 251 (29)<br>825 (508 – 1,790)       | 1,029 ± 202 (29)<br>1,053 (500 – 1,347)   | 922 ± 267 (29)<br>856 (484 – 1,499)     |
| <b>Right White All</b> | 938 ± 225 (29)<br>912 (526 – 1,666)       | 1,053 ± 198 (29)<br>1,067 (543 – 1,378)   | 949 ± 253 (29)<br>899 (529 – 1,462)     |

**4B. Summary of SPECT SD by Region of Brain, in Military Subjects  
at Pre-HBOT, 1-day Post-HBOT, 40-days Post-HBOT**

| Section of Brain       | Pre-HBOT            | 1 day Post-HBOT     | 40 days Post-HBOT   |
|------------------------|---------------------|---------------------|---------------------|
| <b>Left Gray 030</b>   | 53.3 ± 20.3 (29)    | 46.6 ± 21.5 (29)    | 46.8 ± 20.4 (29)    |
|                        | 46.2 (21.1 – 112.2) | 40.2 (14.2 – 96.6)  | 39.9 (15.5 – 93.8)  |
| <b>Left Gray 060</b>   | 63.3 ± 21.9 (29)    | 57.0 ± 24.2 (29)    | 52.3 ± 19.8 (29)    |
|                        | 60.8 (21.6 – 104.9) | 50.1 (28.6 – 111.2) | 51.3 (20.5 – 95)    |
| <b>Left Gray 090</b>   | 56.4 ± 25.7 (29)    | 52.4 ± 25.6 (29)    | 54.0 ± 18.3 (29)    |
|                        | 48.7 (18.7 – 119.1) | 46 (19.6 – 131.2)   | 54.1 (13.5 – 101.3) |
| <b>Left Gray 120</b>   | 53.0 ± 21.3 (29)    | 47.8 ± 21.3 (29)    | 46.9 ± 24.7 (29)    |
|                        | 49.8 (18.7 – 108)   | 47.3 (12.3 – 92.7)  | 45.1 (15.6 – 95.7)  |
| <b>Left Gray 150</b>   | 69 ± 37 (29)        | 55.6 ± 21.3 (29)    | 57.9 ± 28.1 (29)    |
|                        | 58 (22 – 165)       | 49.6 (23.3 – 112)   | 58.1 (13.9 – 126.9) |
| <b>Left Gray All</b>   | 58.9 ± 16.2 (29)    | 51.9 ± 16.5 (29)    | 51.6 ± 12.9 (29)    |
|                        | 56.9 (35.2 – 88.4)  | 48.9 (26 – 88.6)    | 48.9 (26.8 – 80)    |
| <b>Left White 060</b>  | 55.7 ± 26.3 (29)    | 59.4 ± 25.4 (29)    | 54 ± 31 (29)        |
|                        | 50.3 (19.3 – 115.3) | 56.8 (27.8 – 122.5) | 50 (16 – 168)       |
| <b>Left White 120</b>  | 53.9 ± 21.7 (29)    | 52.5 ± 19.8 (29)    | 45.8 ± 26.9 (29)    |
|                        | 47.8 (28.8 – 98.4)  | 50.8 (20.6 – 98.6)  | 37 (14.1 – 127.8)   |
| <b>Left White All</b>  | 54.8 ± 18.7 (29)    | 56.0 ± 15.3 (29)    | 49.9 ± 23.6 (29)    |
|                        | 50.5 (26.6 – 88.3)  | 56.6 (29.5 – 89.9)  | 46.6 (14.9 – 129.7) |
| <b>Right Gray 030</b>  | 48.6 ± 18.7 (29)    | 44.3 ± 17.5 (29)    | 42.4 ± 16.1 (29)    |
|                        | 46.8 (20 – 83.4)    | 41 (15.5 – 89)      | 41.5 (17.8 – 78.5)  |
| <b>Right Gray 060</b>  | 54.5 ± 18.7 (29)    | 50.8 ± 21.4 (29)    | 47.1 ± 14.6 (29)    |
|                        | 53.2 (26.5 – 104.4) | 44.3 (17.1 – 108.5) | 45.4 (19.9 – 80.3)  |
| <b>Right Gray 090</b>  | 59.9 ± 20.4 (29)    | 57.1 ± 21.2 (29)    | 61.8 ± 25.7 (29)    |
|                        | 60.1 (15.1 – 98.8)  | 56.5 (23.5 – 93.3)  | 56.3 (28 – 114.4)   |
| <b>Right Gray 120</b>  | 53.7 ± 23.9 (29)    | 50.0 ± 26.4 (29)    | 53.8 ± 23.8 (29)    |
|                        | 51 (20.7 – 128)     | 49.8 (9.6 – 96.9)   | 47.4 (25.5 – 117.3) |
| <b>Right Gray 150</b>  | 60.0 ± 24.2 (29)    | 58.1 ± 24.5 (29)    | 54.4 ± 19.7 (29)    |
|                        | 59.3 (18.7 – 116.5) | 52.7 (29.2 – 143.8) | 44.9 (25 – 95.3)    |
| <b>Right Gray All</b>  | 55.4 ± 12.6 (29)    | 52.1 ± 15.1 (29)    | 51.9 ± 14.2 (29)    |
|                        | 56.1 (32.2 – 82)    | 51.4 (30.6 – 84.9)  | 50.2 (28.4 – 78.9)  |
| <b>Right White 060</b> | 63.2 ± 26.3 (29)    | 58.2 ± 28.5 (29)    | 50.0 ± 19.1 (29)    |
|                        | 58.5 (22.5 – 113.8) | 49.9 (13.8 – 124)   | 49.4 (14.9 – 79.8)  |
| <b>Right White 120</b> | 50.8 ± 18.4 (29)    | 51.0 ± 20.5 (29)    | 46.8 ± 17.6 (29)    |
|                        | 52.9 (17.2 – 100.6) | 51.5 (20.3 – 90.9)  | 47 (14.9 – 83.8)    |
| <b>Right White All</b> | 57.0 ± 17.8 (29)    | 54.6 ± 19.8 (29)    | 48.4 ± 14.9 (29)    |
|                        | 55.9 (29.3 – 89.7)  | 50.2 (26.1 – 102.8) | 49.5 (20.1 – 72.9)  |

**4C. Summary of SPECT CV by Region of Brain, in Military Subjects  
at Pre-HBOT, 1-day Post-HBOT, 40-days Post-HBOT**

| Section of Brain       | Pre-HBOT            | 1 day Post-HBOT     | 40 days Post-HBOT   |
|------------------------|---------------------|---------------------|---------------------|
| <b>Left Gray 030</b>   | 3.55 ± 1.49 (29)    | 2.90 ± 1.13 (29)    | 3.16 ± 1.30 (29)    |
|                        | 3.24 (1.71 – 8.77)  | 2.54 (1.3 – 5.73)   | 2.86 (0.92 – 6.55)  |
| <b>Left Gray 060</b>   | 4.04 ± 1.16 (29)    | 3.50 ± 1.21 (29)    | 3.35 ± 0.93 (29)    |
|                        | 4.27 (1.36 – 6.01)  | 3.23 (1.92 – 5.59)  | 3.29 (1.46 – 5.33)  |
| <b>Left Gray 090</b>   | 3.64 ± 1.60 (29)    | 3.19 ± 1.20 (29)    | 3.55 ± 1.23 (29)    |
|                        | 3.12 (1.49 – 8)     | 3.07 (1.16 – 6.39)  | 3.25 (1.1 – 6.1)    |
| <b>Left Gray 120</b>   | 3.33 ± 1.03 (29)    | 2.89 ± 1.20 (29)    | 3.05 ± 1.47 (29)    |
|                        | 3.49 (1.48 – 5.09)  | 3.03 (0.85 – 5.92)  | 2.72 (0.99 – 6.34)  |
| <b>Left Gray 150</b>   | 4.00 ± 1.61 (29)    | 3.22 ± 1.19 (29)    | 3.54 ± 1.85 (29)    |
|                        | 4.22 (1.22 – 7.31)  | 2.85 (1.62 – 6.11)  | 3.04 (1.13 – 8.32)  |
| <b>Left Gray All</b>   | 3.71 ± 0.65 (29)    | 3.14 ± 0.76 (29)    | 3.33 ± 0.67 (29)    |
|                        | 3.57 (2.41 – 5.34)  | 2.94 (1.84 – 4.66)  | 3.19 (2.07 – 4.91)  |
| <b>Left White 060</b>  | 5.85 ± 2.69 (29)    | 5.43 ± 2.36 (29)    | 5.32 ± 2.50 (29)    |
|                        | 6.21 (2.24 – 12.53) | 5.19 (1.93 – 12.28) | 5.36 (1.71 – 13.51) |
| <b>Left White 120</b>  | 5.87 ± 2.12 (29)    | 4.98 ± 1.68 (29)    | 4.81 ± 2.31 (29)    |
|                        | 5.2 (2.72 – 11)     | 4.92 (1.82 – 8.33)  | 4.23 (1.82 – 11.16) |
| <b>Left White All</b>  | 5.86 ± 1.86 (29)    | 5.21 ± 1.33 (29)    | 5.06 ± 1.81 (29)    |
|                        | 5.72 (3.14 – 10.22) | 5.34 (3.11 – 8.06)  | 4.91 (2.16 – 10.54) |
| <b>Right Gray 030</b>  | 3.15 ± 0.99 (29)    | 2.83 ± 0.96 (29)    | 2.87 ± 0.97 (29)    |
|                        | 3.1 (1.7 – 5.63)    | 2.79 (1.39 – 5.22)  | 2.78 (1.5 – 5.24)   |
| <b>Right Gray 060</b>  | 3.51 ± 1.02 (29)    | 3.08 ± 0.96 (29)    | 3.11 ± 0.90 (29)    |
|                        | 3.41 (1.46 – 5.39)  | 2.87 (1.15 – 5.06)  | 3.09 (1.46 – 5.79)  |
| <b>Right Gray 090</b>  | 3.92 ± 1.19 (29)    | 3.62 ± 1.30 (29)    | 4.01 ± 1.21 (29)    |
|                        | 3.97 (1.06 – 6.73)  | 3.64 (1.41 – 6.51)  | 3.97 (1.99 – 6.45)  |
| <b>Right Gray 120</b>  | 3.48 ± 1.38 (29)    | 3.02 ± 1.48 (29)    | 3.42 ± 1.10 (29)    |
|                        | 3.33 (1.36 – 7.86)  | 2.96 (0.63 – 6.01)  | 3.4 (1.67 – 6.61)   |
| <b>Right Gray 150</b>  | 3.65 ± 1.43 (29)    | 3.44 ± 1.33 (29)    | 3.33 ± 1.32 (29)    |
|                        | 3.34 (1.01 – 7.24)  | 3.11 (1.79 – 6.78)  | 2.82 (1.78 – 6.58)  |
| <b>Right Gray All</b>  | 3.54 ± 0.59 (29)    | 3.20 ± 0.73 (29)    | 3.35 ± 0.60 (29)    |
|                        | 3.56 (2.13 – 4.94)  | 3.25 (2 – 4.89)     | 3.4 (2.21 – 4.28)   |
| <b>Right White 060</b> | 6.52 ± 2.24 (29)    | 5.53 ± 2.79 (29)    | 5.34 ± 2.34 (29)    |
|                        | 6.45 (2.63 – 10.19) | 5.15 (1.13 – 13.81) | 4.95 (1.76 – 10.6)  |
| <b>Right White 120</b> | 5.76 ± 1.89 (29)    | 4.91 ± 1.67 (29)    | 5.34 ± 2.15 (29)    |
|                        | 5.67 (2.74 – 9.33)  | 4.66 (2.17 – 8.88)  | 5 (1.64 – 9.85)     |
| <b>Right White All</b> | 6.14 ± 1.52 (29)    | 5.22 ± 1.73 (29)    | 5.34 ± 1.98 (29)    |
|                        | 6.11 (2.8 – 9.23)   | 4.91 (2.17 – 8.49)  | 5.02 (2.64 – 10.22) |

**5A. Summary of SPECT MCP by Region of Brain, in Military Subjects  
Changes Between Pre-HBOT, 1-day Post-HBOT, 40-days Post-HBOT**

| Section of Brain      | Pre to 1 day Post                                      | Pre to 40 days Post                                 | 1 day to 40 days Post                                    |
|-----------------------|--------------------------------------------------------|-----------------------------------------------------|----------------------------------------------------------|
| <b>Left Gray 030</b>  | 47 ± 328 (29)<br>1 (-701 – 650)<br>p = 0.450           | -37 ± 454 (29)<br>-116 (-824 – 1,132)<br>p = 0.667  | -83 ± 421 (29)<br>-38 (-856 – 1,165)<br>p = 0.295        |
| <b>Left Gray 060</b>  | 42 ± 353 (29)<br>22 (-725 – 747)<br>p = 0.531          | -29 ± 492 (29)<br>-67 (-1,029 – 1,133)<br>p = 0.756 | -70 ± 406 (29)<br>-79 (-844 – 1,113)<br>p = 0.359        |
| <b>Left Gray 090</b>  | 70 ± 343 (29)<br>69 (-561 – 774)<br>p = 0.282          | -0 ± 487 (29)<br>-36 (-815 – 1,102)<br>p = 1.000    | -70 ± 394 (29)<br>-37 (-839 – 941)<br>p = 0.347          |
| <b>Left Gray 120</b>  | 80 ± 342 (29)<br>51 (-811 – 787)<br>p = 0.218          | -27 ± 455 (29)<br>-115 (-792 – 923)<br>p = 0.749    | -107 ± 417 (29)<br>-56 (-806 – 946)<br>p = 0.177         |
| <b>Left Gray 150</b>  | 62 ± 388 (29)<br>56 (-603 – 959)<br>p = 0.396          | -4 ± 506 (29)<br>-104 (-876 – 1,017)<br>p = 0.966   | -66 ± 419 (29)<br>-122 (-781 – 1,069)<br>p = 0.404       |
| <b>Left Gray All</b>  | 60 ± 337 (29)<br>20 (-652 – 676)<br>p = 0.346          | -19 ± 470 (29)<br>-67 (-845 – 1,012)<br>p = 0.826   | -79 ± 403 (29)<br>-36 (-791 – 1,047)<br>p = 0.298        |
| <b>Left White 060</b> | 152 ± 239 (29)<br>188 (-384 – 637)<br><b>p = 0.002</b> | 38 ± 343 (29)<br>-27 (-680 – 691)<br>p = 0.553      | -114 ± 281 (29)<br>-109 (-583 – 638)<br><b>p = 0.038</b> |
| <b>Left White 120</b> | 131 ± 206 (29)<br>197 (-367 – 430)<br><b>p = 0.002</b> | 16 ± 318 (29)<br>-27 (-560 – 731)<br>p = 0.784      | -114 ± 277 (29)<br>-76 (-594 – 439)<br><b>p = 0.034</b>  |
| <b>Left White All</b> | 141 ± 215 (29)<br>170 (-376 – 504)<br><b>p = 0.001</b> | 27 ± 326 (29)<br>-37 (-620 – 711)<br>p = 0.656      | -114 ± 272 (29)<br>-71 (-566 – 531)<br><b>p = 0.032</b>  |
| <b>Right Gray 030</b> | 32 ± 319 (29)<br>-8 (-591 – 739)<br>p = 0.591          | -43 ± 464 (29)<br>-92 (-883 – 1,126)<br>p = 0.622   | -75 ± 413 (29)<br>-61 (-955 – 1,089)<br>p = 0.335        |
| <b>Right Gray 060</b> | 57 ± 332 (29)<br>8 (-666 – 727)<br>p = 0.361           | -30 ± 461 (29)<br>-123 (-764 – 887)<br>p = 0.725    | -88 ± 382 (29)<br>-65 (-716 – 857)<br>p = 0.227          |
| <b>Right Gray 090</b> | 59 ± 310 (29)<br>46 (-575 – 722)<br>p = 0.318          | -4 ± 475 (29)<br>-29 (-793 – 1,001)<br>p = 0.969    | -62 ± 412 (29)<br>-23 (-835 – 1,030)<br>p = 0.424        |
| <b>Right Gray 120</b> | 79 ± 288 (29)<br>56 (-667 – 605)<br>p = 0.153          | 10 ± 455 (29)<br>4 (-812 – 1,061)<br>p = 0.906      | -69 ± 389 (29)<br>-76 (-794 – 893)<br>p = 0.350          |
| <b>Right Gray 150</b> | 37 ± 380 (29)<br>55 (-908 – 795)<br>p = 0.608          | 12 ± 518 (29)<br>-8 (-1,024 – 1,160)<br>p = 0.898   | -24 ± 434 (29)<br>-1 (-942 – 999)<br>p = 0.766           |



| Section of Brain       | Pre to 1 day Post                                      | Pre to 40 days Post                             | 1 day to 40 days Post                                   |
|------------------------|--------------------------------------------------------|-------------------------------------------------|---------------------------------------------------------|
| <b>Right Gray All</b>  | 53 ± 312 (29)<br>19 (-671 – 689)<br>p = 0.372          | -11 ± 467 (29)<br>-31 (-796 – 971)<br>p = 0.901 | -64 ± 397 (29)<br>-54 (-782 – 974)<br>p = 0.396         |
| <b>Right White 060</b> | 104 ± 185 (29)<br>134 (-320 – 428)<br><b>p = 0.005</b> | 3 ± 324 (29)<br>9 (-765 – 677)<br>p = 0.966     | -102 ± 268 (29)<br>-71 (-568 – 543)<br><b>p = 0.050</b> |
| <b>Right White 120</b> | 127 ± 216 (29)<br>158 (-596 – 558)<br><b>p = 0.004</b> | 21 ± 316 (29)<br>-11 (-670 – 571)<br>p = 0.726  | -107 ± 286 (29)<br>-88 (-723 – 486)<br><b>p = 0.054</b> |
| <b>Right White All</b> | 116 ± 192 (29)<br>156 (-458 – 429)<br><b>p = 0.003</b> | 12 ± 311 (29)<br>18 (-717 – 607)<br>p = 0.842   | -104 ± 270 (29)<br>-77 (-622 – 514)<br><b>p = 0.047</b> |

**5B. Summary of SPECT SD by Region of Brain, in Military Subjects  
Changes Between Pre-HBOT, 1-day Post-HBOT, 40-days Post-HBOT**

| Section of Brain      | Pre to 1 day Post                                    | Pre to 40 days Post                                           | 1 day to 40 days Post                                 |
|-----------------------|------------------------------------------------------|---------------------------------------------------------------|-------------------------------------------------------|
| <b>Left Gray 030</b>  | -6.8 ± 28.4 (29)<br>-10 (-46.5 – 56)<br>p = 0.210    | -6.6 ± 27.4 (29)<br>-8.7 (-69.4 – 37)<br>p = 0.207            | 0.2 ± 24.1 (29)<br>1.7 (-61.3 – 58)<br>p = 0.965      |
| <b>Left Gray 060</b>  | -6 ± 33 (29)<br>-7 (-60 – 50)<br>p = 0.309           | -11.0 ± 26.3 (29)<br>-11.6 (-61.6 – 37.9)<br><b>p = 0.033</b> | -4.7 ± 26.6 (29)<br>-6.4 (-75.9 – 44.9)<br>p = 0.353  |
| <b>Left Gray 090</b>  | -4 ± 39 (29)<br>1 (-69 – 81)<br>p = 0.579            | -2.4 ± 27.5 (29)<br>7.2 (-51.4 – 37.2)<br>p = 0.643           | 2 ± 31 (29)<br>1 (-77 – 51)<br>p = 0.773              |
| <b>Left Gray 120</b>  | -5.1 ± 26.3 (29)<br>-2.3 (-58.7 – 56.7)<br>p = 0.301 | -6 ± 37 (29)<br>-7 (-83 – 77)<br>p = 0.382                    | -0.9 ± 28.2 (29)<br>-2.2 (-41.9 – 60.8)<br>p = 0.865  |
| <b>Left Gray 150</b>  | -13 ± 39 (29)<br>-9 (-107 – 78)<br><b>p = 0.083</b>  | -11 ± 48 (29)<br>-3 (-122 – 81)<br>p = 0.240                  | 2.3 ± 28.1 (29)<br>-1 (-62.3 – 57)<br>p = 0.666       |
| <b>Left Gray All</b>  | -7.0 ± 23.8 (29)<br>-13.6 (-50.2 – 48)<br>p = 0.123  | -7.3 ± 22.5 (29)<br>-9.3 (-48.1 – 41.3)<br><b>p = 0.090</b>   | -0.3 ± 17.0 (29)<br>-0.2 (-37.6 – 29.7)<br>p = 0.928  |
| <b>Left White 060</b> | 4 ± 36 (29)<br>5 (-78 – 78)<br>p = 0.575             | -1.8 ± 27.7 (29)<br>-6.5 (-58.6 – 81.8)<br>p = 0.730          | -6 ± 39 (29)<br>-11 (-86 – 83)<br>p = 0.448           |
| <b>Left White 120</b> | -1.4 ± 28.0 (29)<br>2.8 (-71.9 – 46.6)<br>p = 0.796  | -8.0 ± 30.0 (29)<br>-11.7 (-62.5 – 45)<br>p = 0.161           | -6.7 ± 28.7 (29)<br>-12.3 (-67.5 – 63.8)<br>p = 0.222 |
| <b>Left White All</b> | 1.2 ± 23.0 (29)<br>-1.7 (-35.7 – 47.7)<br>p = 0.779  | -4.9 ± 24.8 (29)<br>-6.6 (-49.4 – 60.5)<br>p = 0.296          | -6.1 ± 25.2 (29)<br>-8.2 (-40.5 – 72.9)<br>p = 0.203  |
| <b>Right Gray 030</b> | -4.3 ± 24.3 (29)<br>-5.3 (-54.4 – 49.7)<br>p = 0.345 | -6.3 ± 22.8 (29)<br>-6.1 (-53.8 – 25.6)<br>p = 0.151          | -1.9 ± 19.2 (29)<br>-0.8 (-38.4 – 39.5)<br>p = 0.594  |
| <b>Right Gray 060</b> | -3.7 ± 23.6 (29)<br>-2.2 (-45.2 – 51.7)<br>p = 0.405 | -7.5 ± 20.2 (29)<br>-6.2 (-59.1 – 40.5)<br><b>p = 0.057</b>   | -3.7 ± 18.9 (29)<br>-2.2 (-37.9 – 31.1)<br>p = 0.295  |
| <b>Right Gray 090</b> | -3 ± 30 (29)<br>1 (-67 – 74)<br>p = 0.625            | 2 ± 30 (29)<br>-6 (-46 – 63)<br>p = 0.737                     | 4.7 ± 28.9 (29)<br>-3.6 (-48.6 – 55.4)<br>p = 0.391   |
| <b>Right Gray 120</b> | -4 ± 33 (29)<br>-7 (-102 – 52)<br>p = 0.542          | 0 ± 35 (29)<br>-4 (-99 – 64)<br>p = 0.996                     | 4 ± 35 (29)<br>3 (-66 – 93)<br>p = 0.564              |
| <b>Right Gray 150</b> | -1.9 ± 28.2 (29)<br>-7.6 (-44.9 – 83.6)<br>p = 0.714 | -5.7 ± 23.9 (29)<br>-11.8 (-36.9 – 49.1)<br>p = 0.213         | -4 ± 31 (29)<br>-3 (-85 – 66)<br>p = 0.524            |

|                        |                                                      |                                                             |                                                      |
|------------------------|------------------------------------------------------|-------------------------------------------------------------|------------------------------------------------------|
| <b>Right Gray All</b>  | -3.3 ± 17.8 (29)<br>-2.7 (-35.5 – 36.6)<br>p = 0.325 | -3.5 ± 15.9 (29)<br>-6.2 (-45.9 – 30.6)<br>p = 0.249        | -0.2 ± 18.2 (29)<br>-2.2 (-29.3 – 47.1)<br>p = 0.958 |
| <b>Right White 060</b> | -5 ± 36 (29)<br>-5 (-75 – 77)<br>p = 0.451           | -13 ± 33 (29)<br>-7 (-92 – 42)<br><b>p = 0.037</b>          | -8 ± 33 (29)<br>-6 (-68 – 61)<br>p = 0.186           |
| <b>Right White 120</b> | 0.1 ± 21.0 (29)<br>-5.2 (-29.7 – 45.1)<br>p = 0.972  | -4.1 ± 22.1 (29)<br>-4.7 (-47.1 – 30.8)<br>p = 0.331        | -4.2 ± 24.2 (29)<br>-3.5 (-58.4 – 41.7)<br>p = 0.358 |
| <b>Right White All</b> | -2.5 ± 23.1 (29)<br>-7.1 (-43.1 – 45.1)<br>p = 0.572 | -8.6 ± 21.8 (29)<br>-5.6 (-64.6 – 30.9)<br><b>p = 0.042</b> | -6.2 ± 23.1 (29)<br>-5.5 (-57.4 – 33.1)<br>p = 0.161 |

**5C. Summary of SPECT CV by Region of Brain, in Military Subjects  
Changes Between Pre-HBOT, 1-day Post-HBOT, 40-days Post-HBOT**

| Section of Brain      | Pre to 1 day Post                                             | Pre to 40 days Post                                           | 1 day to 40 days Post                                  |
|-----------------------|---------------------------------------------------------------|---------------------------------------------------------------|--------------------------------------------------------|
| <b>Left Gray 030</b>  | -0.65 ± 1.71 (29)<br>-0.53 (-4.4 – 3.32)<br><b>p = 0.050</b>  | -0.39 ± 1.59 (29)<br>-0.14 (-3.96 – 2.5)<br>p = 0.198         | 0.26 ± 1.40 (29)<br>0.25 (-3.25 – 4.06)<br>p = 0.329   |
| <b>Left Gray 060</b>  | -0.54 ± 1.61 (29)<br>-0.61 (-3.25 – 2.24)<br><b>p = 0.080</b> | -0.69 ± 1.23 (29)<br>-0.86 (-2.7 – 2.27)<br><b>p = 0.005</b>  | -0.15 ± 1.31 (29)<br>-0.1 (-2.82 – 1.92)<br>p = 0.544  |
| <b>Left Gray 090</b>  | -0.45 ± 1.95 (29)<br>-0.51 (-4.8 – 3.19)<br>p = 0.225         | -0.09 ± 1.75 (29)<br>0 (-3.71 – 3.66)<br>p = 0.779            | 0.36 ± 1.72 (29)<br>0.31 (-3.45 – 3.13)<br>p = 0.272   |
| <b>Left Gray 120</b>  | -0.44 ± 1.41 (29)<br>-0.44 (-3.04 – 2.76)<br>p = 0.107        | -0.27 ± 2.12 (29)<br>-0.8 (-3.33 – 4.54)<br>p = 0.491         | 0.16 ± 1.69 (29)<br>-0.03 (-3.41 – 3.42)<br>p = 0.609  |
| <b>Left Gray 150</b>  | -0.79 ± 1.78 (29)<br>-0.47 (-3.95 – 3.38)<br><b>p = 0.024</b> | -0.47 ± 2.21 (29)<br>0.19 (-4.6 – 3.55)<br>p = 0.265          | 0.32 ± 1.97 (29)<br>0.26 (-4.11 – 4.71)<br>p = 0.389   |
| <b>Left Gray All</b>  | -0.57 ± 1.01 (29)<br>-0.82 (-2.17 – 1.34)<br><b>p = 0.005</b> | -0.38 ± 0.95 (29)<br>-0.57 (-2.27 – 1.66)<br><b>p = 0.039</b> | 0.19 ± 0.93 (29)<br>0.31 (-2.13 – 1.84)<br>p = 0.282   |
| <b>Left White 060</b> | -0.4 ± 3.6 (29)<br>-0.2 (-10.1 – 6.1)<br>p = 0.526            | -0.54 ± 2.75 (29)<br>-0.7 (-7.97 – 4.85)<br>p = 0.303         | -0.1 ± 3.3 (29)<br>0.4 (-6.1 – 6.6)<br>p = 0.861       |
| <b>Left White 120</b> | -0.89 ± 2.81 (29)<br>-0.28 (-7.88 – 3.36)<br>p = 0.100        | -1.06 ± 2.74 (29)<br>-0.87 (-6.12 – 4.88)<br><b>p = 0.046</b> | -0.18 ± 2.78 (29)<br>-0.29 (-6 – 5.82)<br>p = 0.736    |
| <b>Left White All</b> | -0.66 ± 2.27 (29)<br>-0.38 (-6.48 – 2.72)<br>p = 0.130        | -0.80 ± 2.23 (29)<br>-0.79 (-5.26 – 3.11)<br><b>p = 0.064</b> | -0.14 ± 2.05 (29)<br>-0.25 (-3.75 – 5.87)<br>p = 0.711 |
| <b>Right Gray 030</b> | -0.32 ± 1.45 (29)<br>-0.02 (-3.62 – 2.3)<br>p = 0.245         | -0.28 ± 1.52 (29)<br>-0.57 (-3.84 – 3.19)<br>p = 0.333        | 0.04 ± 1.34 (29)<br>-0.08 (-2.69 – 2.57)<br>p = 0.869  |
| <b>Right Gray 060</b> | -0.44 ± 1.18 (29)<br>-0.43 (-2.86 – 2.11)<br><b>p = 0.055</b> | -0.40 ± 1.33 (29)<br>-0.51 (-2.7 – 3.38)<br>p = 0.114         | 0.04 ± 1.04 (29)<br>0.29 (-2.37 – 2.35)<br>p = 0.856   |
| <b>Right Gray 090</b> | -0.30 ± 1.80 (29)<br>-0.16 (-4.61 – 5.23)<br>p = 0.370        | 0.08 ± 1.32 (29)<br>0.04 (-3.53 – 3.35)<br>p = 0.736          | 0.39 ± 1.47 (29)<br>0.19 (-2.14 – 3.39)<br>p = 0.165   |
| <b>Right Gray 120</b> | -0.46 ± 1.90 (29)<br>-0.8 (-6.34 – 2.3)<br>p = 0.204          | -0.06 ± 1.80 (29)<br>0.05 (-4.63 – 2.75)<br>p = 0.851         | 0.40 ± 1.95 (29)<br>0.35 (-3.81 – 5.12)<br>p = 0.285   |
| <b>Right Gray 150</b> | -0.20 ± 1.33 (29)<br>-0.17 (-2.36 – 2.41)<br>p = 0.415        | -0.32 ± 1.35 (29)<br>-0.46 (-2.84 – 1.97)<br>p = 0.217        | -0.11 ± 1.87 (29)<br>0.11 (-4.38 – 3.46)<br>p = 0.745  |

|                        |                                                               |                                                               |                                                       |
|------------------------|---------------------------------------------------------------|---------------------------------------------------------------|-------------------------------------------------------|
| <b>Right Gray All</b>  | -0.34 ± 0.83 (29)<br>-0.19 (-2.42 – 1.34)<br><b>p = 0.033</b> | -0.20 ± 0.59 (29)<br>-0.3 (-1.25 – 0.91)<br><b>p = 0.087</b>  | 0.15 ± 0.94 (29)<br>0.14 (-2.59 – 2.08)<br>p = 0.398  |
| <b>Right White 060</b> | -1.0 ± 3.4 (29)<br>-1.6 (-6.6 – 6.8)<br>p = 0.127             | -1.19 ± 2.92 (29)<br>-1.25 (-6.92 – 5.58)<br><b>p = 0.037</b> | -0.2 ± 3.2 (29)<br>0 (-6.6 – 7)<br>p = 0.742          |
| <b>Right White 120</b> | -0.85 ± 1.95 (29)<br>-0.94 (-5.04 – 2.98)<br><b>p = 0.027</b> | -0.42 ± 2.73 (29)<br>0.1 (-4.6 – 5.55)<br>p = 0.413           | 0.43 ± 2.54 (29)<br>-0.06 (-5.24 – 5.19)<br>p = 0.373 |
| <b>Right White All</b> | -0.92 ± 2.07 (29)<br>-1.44 (-4.15 – 3.62)<br><b>p = 0.024</b> | -0.80 ± 2.30 (29)<br>-1.03 (-4.59 – 4.28)<br><b>p = 0.070</b> | 0.12 ± 2.26 (29)<br>0.01 (-4.76 – 5.32)<br>p = 0.786  |
